# Supplementary material for: Luteolin Potentially Treating Prostate Cancer and COVID-19 Analyzed by the Bioinformatics Approach: Clinical Findings and Drug Targets
Source: Front Endocrinol (Lausanne). 2022 Feb 1;12:802447. doi: 10.3389/fendo.2021.802447 (PMC8844187; doi:10.3389/fendo.2021.802447)
Supplement: Supplementary file 4 [file Table_4.xlsx]

## Sheet: GeneCards-COVID-19
Gene Symbol	Description	Category	Gifts	GC Id	Relevance score	GeneCards Link
ACE2	Angiotensin Converting Enzyme 2	Protein Coding	48	GC0XM015494	28.8124	https://www.genecards.org/cgi-bin/carddisp.pl?gene=ACE2
TLR7	Toll Like Receptor 7	Protein Coding	46	GC0XP012867	22.6098	https://www.genecards.org/cgi-bin/carddisp.pl?gene=TLR7
TMPRSS2	Transmembrane Serine Protease 2	Protein Coding	44	GC21M041464	18.4644	https://www.genecards.org/cgi-bin/carddisp.pl?gene=TMPRSS2
IL6	Interleukin 6	Protein Coding	48	GC07P022725	17.5609	https://www.genecards.org/cgi-bin/carddisp.pl?gene=IL6
TNF	Tumor Necrosis Factor	Protein Coding	49	GC06P061170	13.996	https://www.genecards.org/cgi-bin/carddisp.pl?gene=TNF
DPP4	Dipeptidyl Peptidase 4	Protein Coding	48	GC02M161992	12.736	https://www.genecards.org/cgi-bin/carddisp.pl?gene=DPP4
ACE	Angiotensin I Converting Enzyme	Protein Coding	49	GC17P063477	12.4768	https://www.genecards.org/cgi-bin/carddisp.pl?gene=ACE
TLR4	Toll Like Receptor 4	Protein Coding	50	GC09P117704	12.2235	https://www.genecards.org/cgi-bin/carddisp.pl?gene=TLR4
NRP1	Neuropilin 1	Protein Coding	45	GC10M033177	12.2063	https://www.genecards.org/cgi-bin/carddisp.pl?gene=NRP1
HLA-A	Major Histocompatibility Complex, Class I, A	Protein Coding	46	GC06P061131	12.1613	https://www.genecards.org/cgi-bin/carddisp.pl?gene=HLA-A
TNNI3	Troponin I3, Cardiac Type	Protein Coding	48	GC19M055151	11.6176	https://www.genecards.org/cgi-bin/carddisp.pl?gene=TNNI3
IL1B	Interleukin 1 Beta	Protein Coding	47	GC02M112829	11.4292	https://www.genecards.org/cgi-bin/carddisp.pl?gene=IL1B
HLA-C	Major Histocompatibility Complex, Class I, C	Protein Coding	44	GC06M051344	11.0744	https://www.genecards.org/cgi-bin/carddisp.pl?gene=HLA-C
IFNA2	Interferon Alpha 2	Protein Coding	41	GC09M021384	11.0579	https://www.genecards.org/cgi-bin/carddisp.pl?gene=IFNA2
EGFR	Epidermal Growth Factor Receptor	Protein Coding	52	GC07P055019	10.9761	https://www.genecards.org/cgi-bin/carddisp.pl?gene=EGFR
IL2RA	Interleukin 2 Receptor Subunit Alpha	Protein Coding	49	GC10M006010	10.6552	https://www.genecards.org/cgi-bin/carddisp.pl?gene=IL2RA
IL4	Interleukin 4	Protein Coding	44	GC05P132673	10.4772	https://www.genecards.org/cgi-bin/carddisp.pl?gene=IL4
NPPB	Natriuretic Peptide B	Protein Coding	43	GC01M011858	10.3245	https://www.genecards.org/cgi-bin/carddisp.pl?gene=NPPB
CXCL10	C-X-C Motif Chemokine Ligand 10	Protein Coding	43	GC04M076021	10.2454	https://www.genecards.org/cgi-bin/carddisp.pl?gene=CXCL10
F3	Coagulation Factor III, Tissue Factor	Protein Coding	44	GC01M094530	10.1419	https://www.genecards.org/cgi-bin/carddisp.pl?gene=F3
CXCL8	C-X-C Motif Chemokine Ligand 8	Protein Coding	40	GC04P073740	9.94384	https://www.genecards.org/cgi-bin/carddisp.pl?gene=CXCL8
CCL2	C-C Motif Chemokine Ligand 2	Protein Coding	48	GC17P034255	9.90709	https://www.genecards.org/cgi-bin/carddisp.pl?gene=CCL2
ADAM17	ADAM Metallopeptidase Domain 17	Protein Coding	50	GC02M009488	9.44347	https://www.genecards.org/cgi-bin/carddisp.pl?gene=ADAM17
JAK1	Janus Kinase 1	Protein Coding	52	GC01M064833	9.22425	https://www.genecards.org/cgi-bin/carddisp.pl?gene=JAK1
VWF	Von Willebrand Factor	Protein Coding	48	GC12M005917	9.16426	https://www.genecards.org/cgi-bin/carddisp.pl?gene=VWF
IFNB1	Interferon Beta 1	Protein Coding	40	GC09M021077	9.08649	https://www.genecards.org/cgi-bin/carddisp.pl?gene=IFNB1
IFNA1	Interferon Alpha 1	Protein Coding	38	GC09P021543	8.44084	https://www.genecards.org/cgi-bin/carddisp.pl?gene=IFNA1
NLRP3	NLR Family Pyrin Domain Containing 3	Protein Coding	46	GC01P247415	8.35474	https://www.genecards.org/cgi-bin/carddisp.pl?gene=NLRP3
F2	Coagulation Factor II, Thrombin	Protein Coding	47	GC11P046720	8.32726	https://www.genecards.org/cgi-bin/carddisp.pl?gene=F2
CSF2	Colony Stimulating Factor 2	Protein Coding	42	GC05P132073	8.0885	https://www.genecards.org/cgi-bin/carddisp.pl?gene=CSF2
CRP	C-Reactive Protein	Protein Coding	45	GC01M159721	6.76401	https://www.genecards.org/cgi-bin/carddisp.pl?gene=CRP
INS	Insulin	Protein Coding	46	GC11M002159	6.65683	https://www.genecards.org/cgi-bin/carddisp.pl?gene=INS
ABO	ABO, Alpha 1-3-N-Acetylgalactosaminyltransferase And Alpha 1-3-Galactosyltransferase	Protein Coding	35	GC09M133250	6.48222	https://www.genecards.org/cgi-bin/carddisp.pl?gene=ABO
IFNAR2	Interferon Alpha And Beta Receptor Subunit 2	Protein Coding	48	GC21P033229	6.10242	https://www.genecards.org/cgi-bin/carddisp.pl?gene=IFNAR2
IL10	Interleukin 10	Protein Coding	46	GC01M206767	6.05379	https://www.genecards.org/cgi-bin/carddisp.pl?gene=IL10
TNFRSF1A	TNF Receptor Superfamily Member 1A	Protein Coding	48	GC12M006328	5.91732	https://www.genecards.org/cgi-bin/carddisp.pl?gene=TNFRSF1A
AR	Androgen Receptor	Protein Coding	52	GC0XP067544	5.45301	https://www.genecards.org/cgi-bin/carddisp.pl?gene=AR
OAS1	2'-5'-Oligoadenylate Synthetase 1	Protein Coding	44	GC12P112918	5.23932	https://www.genecards.org/cgi-bin/carddisp.pl?gene=OAS1
PMS2	PMS1 Homolog 2, Mismatch Repair System Component	Protein Coding	48	GC07M005973	5.18065	https://www.genecards.org/cgi-bin/carddisp.pl?gene=PMS2
CHAT	Choline O-Acetyltransferase	Protein Coding	46	GC10P049609	5.18065	https://www.genecards.org/cgi-bin/carddisp.pl?gene=CHAT
MTM1	Myotubularin 1	Protein Coding	44	GC0XP150562	5.18065	https://www.genecards.org/cgi-bin/carddisp.pl?gene=MTM1
CLCN6	Chloride Voltage-Gated Channel 6	Protein Coding	42	GC01P011806	5.18065	https://www.genecards.org/cgi-bin/carddisp.pl?gene=CLCN6
INPP5E	Inositol Polyphosphate-5-Phosphatase E	Protein Coding	41	GC09M136428	5.18065	https://www.genecards.org/cgi-bin/carddisp.pl?gene=INPP5E
MUC1	Mucin 1, Cell Surface Associated	Protein Coding	46	GC01M155185	5.05645	https://www.genecards.org/cgi-bin/carddisp.pl?gene=MUC1
FURIN	Furin, Paired Basic Amino Acid Cleaving Enzyme	Protein Coding	45	GC15P090868	5.01331	https://www.genecards.org/cgi-bin/carddisp.pl?gene=FURIN
SLC6A20	Solute Carrier Family 6 Member 20	Protein Coding	41	GC03M045755	4.96911	https://www.genecards.org/cgi-bin/carddisp.pl?gene=SLC6A20
LOC117134593	ACE2 Promoter Region	Biological Region	1	GC0XP015600	4.7341	https://www.genecards.org/cgi-bin/carddisp.pl?gene=LOC117134593
HLA-B	Major Histocompatibility Complex, Class I, B	Protein Coding	46	GC06M051345	4.72231	https://www.genecards.org/cgi-bin/carddisp.pl?gene=HLA-B
TBK1	TANK Binding Kinase 1	Protein Coding	48	GC12P064451	4.63991	https://www.genecards.org/cgi-bin/carddisp.pl?gene=TBK1
TLR3	Toll Like Receptor 3	Protein Coding	50	GC04P186059	4.63579	https://www.genecards.org/cgi-bin/carddisp.pl?gene=TLR3
BSG	Basigin (Ok Blood Group)	Protein Coding	42	GC19P000571	4.42463	https://www.genecards.org/cgi-bin/carddisp.pl?gene=BSG
IRF3	Interferon Regulatory Factor 3	Protein Coding	45	GC19M049659	4.41148	https://www.genecards.org/cgi-bin/carddisp.pl?gene=IRF3
CXCR6	C-X-C Motif Chemokine Receptor 6	Protein Coding	40	GC03P045982	4.4027	https://www.genecards.org/cgi-bin/carddisp.pl?gene=CXCR6
TNFRSF1B	TNF Receptor Superfamily Member 1B	Protein Coding	46	GC01P012167	4.39338	https://www.genecards.org/cgi-bin/carddisp.pl?gene=TNFRSF1B
IFNG	Interferon Gamma	Protein Coding	46	GC12M068154	4.30698	https://www.genecards.org/cgi-bin/carddisp.pl?gene=IFNG
IL17A	Interleukin 17A	Protein Coding	41	GC06P052186	4.27791	https://www.genecards.org/cgi-bin/carddisp.pl?gene=IL17A
FYCO1	FYVE And Coiled-Coil Domain Autophagy Adaptor 1	Protein Coding	40	GC03M045917	4.18937	https://www.genecards.org/cgi-bin/carddisp.pl?gene=FYCO1
CCR9	C-C Motif Chemokine Receptor 9	Protein Coding	40	GC03P045903	4.07805	https://www.genecards.org/cgi-bin/carddisp.pl?gene=CCR9
IFIH1	Interferon Induced With Helicase C Domain 1	Protein Coding	46	GC02M162267	3.97207	https://www.genecards.org/cgi-bin/carddisp.pl?gene=IFIH1
LOC117134604	TMPRSS2 Promoter Region	Biological Region	1	GC21P041507	3.96828	https://www.genecards.org/cgi-bin/carddisp.pl?gene=LOC117134604
LOC117135106	TMPRSS2 Androgen Receptor-Responsive -60 Kb Enhancer	Biological Region	1	GC21P041568	3.94894	https://www.genecards.org/cgi-bin/carddisp.pl?gene=LOC117135106
LOC117134608	TMPRSS2 Androgen Receptor-Responsive -13 Kb Enhancer	Biological Region	1	GC21P041519	3.94894	https://www.genecards.org/cgi-bin/carddisp.pl?gene=LOC117134608
LOC112679198	ABO +5.8 Intron 1 Enhancer	Biological Region	1	GC09P133267	3.86318	https://www.genecards.org/cgi-bin/carddisp.pl?gene=LOC112679198
LOC119086083	CCR9 Promoter Region	Biological Region	1	GC03P045885	3.86318	https://www.genecards.org/cgi-bin/carddisp.pl?gene=LOC119086083
SERPINA1	Serpin Family A Member 1	Protein Coding	48	GC14M094376	3.78063	https://www.genecards.org/cgi-bin/carddisp.pl?gene=SERPINA1
ADM	Adrenomedullin	Protein Coding	44	GC11P010304	3.75369	https://www.genecards.org/cgi-bin/carddisp.pl?gene=ADM
IL7	Interleukin 7	Protein Coding	41	GC08M078689	3.73452	https://www.genecards.org/cgi-bin/carddisp.pl?gene=IL7
IFNAR1	Interferon Alpha And Beta Receptor Subunit 1	Protein Coding	44	GC21P033324	3.70029	https://www.genecards.org/cgi-bin/carddisp.pl?gene=IFNAR1
ALB	Albumin	Protein Coding	48	GC04P073397	3.69419	https://www.genecards.org/cgi-bin/carddisp.pl?gene=ALB
CTSL	Cathepsin L	Protein Coding	45	GC09P087725	3.68281	https://www.genecards.org/cgi-bin/carddisp.pl?gene=CTSL
IL2	Interleukin 2	Protein Coding	44	GC04M122451	3.67715	https://www.genecards.org/cgi-bin/carddisp.pl?gene=IL2
HMOX1	Heme Oxygenase 1	Protein Coding	51	GC22P035380	3.66601	https://www.genecards.org/cgi-bin/carddisp.pl?gene=HMOX1
APOE	Apolipoprotein E	Protein Coding	49	GC19P044906	3.65077	https://www.genecards.org/cgi-bin/carddisp.pl?gene=APOE
MBL2	Mannose Binding Lectin 2	Protein Coding	46	GC10M052760	3.64633	https://www.genecards.org/cgi-bin/carddisp.pl?gene=MBL2
STAT1	Signal Transducer And Activator Of Transcription 1	Protein Coding	52	GC02M190908	3.61282	https://www.genecards.org/cgi-bin/carddisp.pl?gene=STAT1
HSPA5	Heat Shock Protein Family A (Hsp70) Member 5	Protein Coding	46	GC09M125234	3.61277	https://www.genecards.org/cgi-bin/carddisp.pl?gene=HSPA5
IFITM3	Interferon Induced Transmembrane Protein 3	Protein Coding	41	GC11M000319	3.59882	https://www.genecards.org/cgi-bin/carddisp.pl?gene=IFITM3
STAT3	Signal Transducer And Activator Of Transcription 3	Protein Coding	51	GC17M042313	3.59423	https://www.genecards.org/cgi-bin/carddisp.pl?gene=STAT3
RPL36	Ribosomal Protein L36	Protein Coding	39	GC19P005674	3.53223	https://www.genecards.org/cgi-bin/carddisp.pl?gene=RPL36
XCR1	X-C Motif Chemokine Receptor 1	Protein Coding	39	GC03M046016	3.51165	https://www.genecards.org/cgi-bin/carddisp.pl?gene=XCR1
LZTFL1	Leucine Zipper Transcription Factor Like 1	Protein Coding	38	GC03M045823	3.51165	https://www.genecards.org/cgi-bin/carddisp.pl?gene=LZTFL1
AGT	Angiotensinogen	Protein Coding	48	GC01M230702	3.44956	https://www.genecards.org/cgi-bin/carddisp.pl?gene=AGT
LOC117135105	TMPRSS2 E4 Enhancer	Biological Region	1	GC21P041535	3.38253	https://www.genecards.org/cgi-bin/carddisp.pl?gene=LOC117135105
LOC117134606	TMPRSS2 Repressive Element NBS2	Biological Region	1	GC21P041511	3.38253	https://www.genecards.org/cgi-bin/carddisp.pl?gene=LOC117134606
LOC117134607	TMPRSS2 Repressive Element NBS4	Biological Region	1	GC21P041518	3.38253	https://www.genecards.org/cgi-bin/carddisp.pl?gene=LOC117134607
LOC117134611	TMPRSS2 -17 Kb Enhancer	Biological Region	1	GC21P041525	3.38253	https://www.genecards.org/cgi-bin/carddisp.pl?gene=LOC117134611
LOC117135104	TMPRSS2 E3 Enhancer	Biological Region	1	GC21P041529	3.38253	https://www.genecards.org/cgi-bin/carddisp.pl?gene=LOC117135104
LOC117134605	TMPRSS2 Repressive Element NBS1	Biological Region	1	GC21P041510	3.38253	https://www.genecards.org/cgi-bin/carddisp.pl?gene=LOC117134605
CCR5	C-C Motif Chemokine Receptor 5	Protein Coding	45	GC03P046383	3.35592	https://www.genecards.org/cgi-bin/carddisp.pl?gene=CCR5
PRF1	Perforin 1	Protein Coding	44	GC10M070597	3.35592	https://www.genecards.org/cgi-bin/carddisp.pl?gene=PRF1
AAK1	AP2 Associated Kinase 1	Protein Coding	40	GC02M069459	3.26483	https://www.genecards.org/cgi-bin/carddisp.pl?gene=AAK1
S100A8	S100 Calcium Binding Protein A8	Protein Coding	41	GC01M153391	3.2314	https://www.genecards.org/cgi-bin/carddisp.pl?gene=S100A8
CD14	CD14 Molecule	Protein Coding	44	GC05M140631	3.21794	https://www.genecards.org/cgi-bin/carddisp.pl?gene=CD14
ADAMTS13	ADAM Metallopeptidase With Thrombospondin Type 1 Motif 13	Protein Coding	45	GC09P133414	3.19917	https://www.genecards.org/cgi-bin/carddisp.pl?gene=ADAMTS13
PTX3	Pentraxin 3	Protein Coding	41	GC03P157436	3.176	https://www.genecards.org/cgi-bin/carddisp.pl?gene=PTX3
HMGB1	High Mobility Group Box 1	Protein Coding	44	GC13M030456	3.16254	https://www.genecards.org/cgi-bin/carddisp.pl?gene=HMGB1
CD209	CD209 Molecule	Protein Coding	42	GC19M007739	3.13893	https://www.genecards.org/cgi-bin/carddisp.pl?gene=CD209
CALCA	Calcitonin Related Polypeptide Alpha	Protein Coding	42	GC11M014945	3.05289	https://www.genecards.org/cgi-bin/carddisp.pl?gene=CALCA
AVP	Arginine Vasopressin	Protein Coding	45	GC20M003082	3.04549	https://www.genecards.org/cgi-bin/carddisp.pl?gene=AVP
S100A9	S100 Calcium Binding Protein A9	Protein Coding	41	GC01P153357	2.99588	https://www.genecards.org/cgi-bin/carddisp.pl?gene=S100A9
STING1	Stimulator Of Interferon Response CGAMP Interactor 1	Protein Coding	33	GC05M139476	2.96542	https://www.genecards.org/cgi-bin/carddisp.pl?gene=STING1
CCL3	C-C Motif Chemokine Ligand 3	Protein Coding	38	GC17M036088	2.94161	https://www.genecards.org/cgi-bin/carddisp.pl?gene=CCL3
SLC6A19	Solute Carrier Family 6 Member 19	Protein Coding	44	GC05P001201	2.91699	https://www.genecards.org/cgi-bin/carddisp.pl?gene=SLC6A19
IL18	Interleukin 18	Protein Coding	42	GC11M112143	2.90566	https://www.genecards.org/cgi-bin/carddisp.pl?gene=IL18
VPS39	VPS39 Subunit Of HOPS Complex	Protein Coding	38	GC15M042159	2.86081	https://www.genecards.org/cgi-bin/carddisp.pl?gene=VPS39
MAVS	Mitochondrial Antiviral Signaling Protein	Protein Coding	39	GC20P003850	2.83825	https://www.genecards.org/cgi-bin/carddisp.pl?gene=MAVS
MAS1	MAS1 Proto-Oncogene, G Protein-Coupled Receptor	Protein Coding	39	GC06P159937	2.83534	https://www.genecards.org/cgi-bin/carddisp.pl?gene=MAS1
LOC118966792	DACE2 Interferon-Inducible Promoter Region	Biological Region	1	GC0XP015580	2.79422	https://www.genecards.org/cgi-bin/carddisp.pl?gene=LOC118966792
C5	Complement C5	Protein Coding	45	GC09M120952	2.79327	https://www.genecards.org/cgi-bin/carddisp.pl?gene=C5
C5AR1	Complement C5a Receptor 1	Protein Coding	43	GC19P047290	2.79327	https://www.genecards.org/cgi-bin/carddisp.pl?gene=C5AR1
CCR6	C-C Motif Chemokine Receptor 6	Protein Coding	44	GC06P167111	2.78459	https://www.genecards.org/cgi-bin/carddisp.pl?gene=CCR6
IFNL1	Interferon Lambda 1	Protein Coding	34	GC19P039296	2.76023	https://www.genecards.org/cgi-bin/carddisp.pl?gene=IFNL1
LOC117600004	CTSL Promoter Region	Biological Region	1	GC09P087724	2.75149	https://www.genecards.org/cgi-bin/carddisp.pl?gene=LOC117600004
DDX58	DExD/H-Box Helicase 58	Protein Coding	46	GC09M032455	2.72265	https://www.genecards.org/cgi-bin/carddisp.pl?gene=DDX58
MMP3	Matrix Metallopeptidase 3	Protein Coding	50	GC11M102835	2.72177	https://www.genecards.org/cgi-bin/carddisp.pl?gene=MMP3
SELP	Selectin P	Protein Coding	44	GC01M169558	2.72177	https://www.genecards.org/cgi-bin/carddisp.pl?gene=SELP
ADIPOQ	Adiponectin, C1Q And Collagen Domain Containing	Protein Coding	44	GC03P186842	2.7026	https://www.genecards.org/cgi-bin/carddisp.pl?gene=ADIPOQ
IRF7	Interferon Regulatory Factor 7	Protein Coding	46	GC11M000612	2.69706	https://www.genecards.org/cgi-bin/carddisp.pl?gene=IRF7
SERPINC1	Serpin Family C Member 1	Protein Coding	47	GC01M174312	2.69283	https://www.genecards.org/cgi-bin/carddisp.pl?gene=SERPINC1
TGFB1	Transforming Growth Factor Beta 1	Protein Coding	50	GC19M041301	2.69081	https://www.genecards.org/cgi-bin/carddisp.pl?gene=TGFB1
ISG15	ISG15 Ubiquitin Like Modifier	Protein Coding	45	GC01P001001	2.68058	https://www.genecards.org/cgi-bin/carddisp.pl?gene=ISG15
EDN1	Endothelin 1	Protein Coding	46	GC06P012256	2.67392	https://www.genecards.org/cgi-bin/carddisp.pl?gene=EDN1
TYK2	Tyrosine Kinase 2	Protein Coding	52	GC19M010350	2.6668	https://www.genecards.org/cgi-bin/carddisp.pl?gene=TYK2
OAS3	2'-5'-Oligoadenylate Synthetase 3	Protein Coding	40	GC12P112938	2.6668	https://www.genecards.org/cgi-bin/carddisp.pl?gene=OAS3
GPT	Glutamic--Pyruvic Transaminase	Protein Coding	41	GC08P144502	2.6485	https://www.genecards.org/cgi-bin/carddisp.pl?gene=GPT
KNG1	Kininogen 1	Protein Coding	44	GC03P186717	2.64042	https://www.genecards.org/cgi-bin/carddisp.pl?gene=KNG1
FAS	Fas Cell Surface Death Receptor	Protein Coding	49	GC10P088969	2.63119	https://www.genecards.org/cgi-bin/carddisp.pl?gene=FAS
CCL17	C-C Motif Chemokine Ligand 17	Protein Coding	37	GC16P057407	2.62757	https://www.genecards.org/cgi-bin/carddisp.pl?gene=CCL17
ANGPT2	Angiopoietin 2	Protein Coding	44	GC08M006499	2.60959	https://www.genecards.org/cgi-bin/carddisp.pl?gene=ANGPT2
SELL	Selectin L	Protein Coding	42	GC01M169690	2.57252	https://www.genecards.org/cgi-bin/carddisp.pl?gene=SELL
CLEC4M	C-Type Lectin Domain Family 4 Member M	Protein Coding	40	GC19P007763	2.57252	https://www.genecards.org/cgi-bin/carddisp.pl?gene=CLEC4M
CCL4	C-C Motif Chemokine Ligand 4	Protein Coding	39	GC17P036103	2.57252	https://www.genecards.org/cgi-bin/carddisp.pl?gene=CCL4
TTR	Transthyretin	Protein Coding	48	GC18P031557	2.53045	https://www.genecards.org/cgi-bin/carddisp.pl?gene=TTR
SIGLEC1	Sialic Acid Binding Ig Like Lectin 1	Protein Coding	40	GC20M003686	2.49355	https://www.genecards.org/cgi-bin/carddisp.pl?gene=SIGLEC1
CXCL1	C-X-C Motif Chemokine Ligand 1	Protein Coding	42	GC04P073869	2.48054	https://www.genecards.org/cgi-bin/carddisp.pl?gene=CXCL1
IL1A	Interleukin 1 Alpha	Protein Coding	42	GC02M112773	2.48054	https://www.genecards.org/cgi-bin/carddisp.pl?gene=IL1A
CXCL2	C-X-C Motif Chemokine Ligand 2	Protein Coding	39	GC04M074097	2.48054	https://www.genecards.org/cgi-bin/carddisp.pl?gene=CXCL2
IRF9	Interferon Regulatory Factor 9	Protein Coding	44	GC14P024161	2.48003	https://www.genecards.org/cgi-bin/carddisp.pl?gene=IRF9
F11	Coagulation Factor XI	Protein Coding	45	GC04P186265	2.44634	https://www.genecards.org/cgi-bin/carddisp.pl?gene=F11
AGTR2	Angiotensin II Receptor Type 2	Protein Coding	42	GC0XP116170	2.43405	https://www.genecards.org/cgi-bin/carddisp.pl?gene=AGTR2
VAMP8	Vesicle Associated Membrane Protein 8	Protein Coding	40	GC02P085561	2.43405	https://www.genecards.org/cgi-bin/carddisp.pl?gene=VAMP8
HIF1A	Hypoxia Inducible Factor 1 Subunit Alpha	Protein Coding	46	GC14P061695	2.43332	https://www.genecards.org/cgi-bin/carddisp.pl?gene=HIF1A
REN	Renin	Protein Coding	46	GC01M204154	2.4155	https://www.genecards.org/cgi-bin/carddisp.pl?gene=REN
FGA	Fibrinogen Alpha Chain	Protein Coding	46	GC04M154583	2.41499	https://www.genecards.org/cgi-bin/carddisp.pl?gene=FGA
PLAUR	Plasminogen Activator, Urokinase Receptor	Protein Coding	43	GC19M043646	2.40913	https://www.genecards.org/cgi-bin/carddisp.pl?gene=PLAUR
NEU1	Neuraminidase 1	Protein Coding	43	GC06M031857	2.40878	https://www.genecards.org/cgi-bin/carddisp.pl?gene=NEU1
VPS41	VPS41 Subunit Of HOPS Complex	Protein Coding	38	GC07M038854	2.40054	https://www.genecards.org/cgi-bin/carddisp.pl?gene=VPS41
ENPEP	Glutamyl Aminopeptidase	Protein Coding	44	GC04P110365	2.37879	https://www.genecards.org/cgi-bin/carddisp.pl?gene=ENPEP
BECN1	Beclin 1	Protein Coding	45	GC17M042810	2.37795	https://www.genecards.org/cgi-bin/carddisp.pl?gene=BECN1
IL6R	Interleukin 6 Receptor	Protein Coding	48	GC01P154405	2.37066	https://www.genecards.org/cgi-bin/carddisp.pl?gene=IL6R
SAA1	Serum Amyloid A1	Protein Coding	41	GC11P018294	2.34927	https://www.genecards.org/cgi-bin/carddisp.pl?gene=SAA1
SIGMAR1	Sigma Non-Opioid Intracellular Receptor 1	Protein Coding	46	GC09M034634	2.33925	https://www.genecards.org/cgi-bin/carddisp.pl?gene=SIGMAR1
TLR2	Toll Like Receptor 2	Protein Coding	50	GC04P153684	2.26337	https://www.genecards.org/cgi-bin/carddisp.pl?gene=TLR2
MUC5AC	Mucin 5AC, Oligomeric Mucus/Gel-Forming	Protein Coding	37	GC11P001165	2.25848	https://www.genecards.org/cgi-bin/carddisp.pl?gene=MUC5AC
GPHN	Gephyrin	Protein Coding	47	GC14P066507	2.24931	https://www.genecards.org/cgi-bin/carddisp.pl?gene=GPHN
CCHCR1	Coiled-Coil Alpha-Helical Rod Protein 1	Protein Coding	37	GC06M051336	2.24931	https://www.genecards.org/cgi-bin/carddisp.pl?gene=CCHCR1
SNAP29	Synaptosome Associated Protein 29	Protein Coding	42	GC22P020859	2.24788	https://www.genecards.org/cgi-bin/carddisp.pl?gene=SNAP29
STX17	Syntaxin 17	Protein Coding	34	GC09P099906	2.24788	https://www.genecards.org/cgi-bin/carddisp.pl?gene=STX17
TNNT2	Troponin T2, Cardiac Type	Protein Coding	48	GC01M201359	2.2058	https://www.genecards.org/cgi-bin/carddisp.pl?gene=TNNT2
IL33	Interleukin 33	Protein Coding	38	GC09P006206	2.2058	https://www.genecards.org/cgi-bin/carddisp.pl?gene=IL33
NFE2L2	Nuclear Factor, Erythroid 2 Like 2	Protein Coding	48	GC02M177227	2.20217	https://www.genecards.org/cgi-bin/carddisp.pl?gene=NFE2L2
PTPRS	Protein Tyrosine Phosphatase Receptor Type S	Protein Coding	44	GC19M005157	2.18427	https://www.genecards.org/cgi-bin/carddisp.pl?gene=PTPRS
MYD88	MYD88 Innate Immune Signal Transduction Adaptor	Protein Coding	48	GC03P038139	2.16625	https://www.genecards.org/cgi-bin/carddisp.pl?gene=MYD88
VKORC1	Vitamin K Epoxide Reductase Complex Subunit 1	Protein Coding	46	GC16M032437	2.15444	https://www.genecards.org/cgi-bin/carddisp.pl?gene=VKORC1
TLR8	Toll Like Receptor 8	Protein Coding	47	GC0XP012924	2.11635	https://www.genecards.org/cgi-bin/carddisp.pl?gene=TLR8
CCL5	C-C Motif Chemokine Ligand 5	Protein Coding	42	GC17M035871	2.06406	https://www.genecards.org/cgi-bin/carddisp.pl?gene=CCL5
NCAM1	Neural Cell Adhesion Molecule 1	Protein Coding	45	GC11P112961	2.0151	https://www.genecards.org/cgi-bin/carddisp.pl?gene=NCAM1
TH2-LCR	Th2 Cytokine Locus Control Region	Biological Region	2	GC05P132629	2.0151	https://www.genecards.org/cgi-bin/carddisp.pl?gene=TH2-LCR
LOC106699567	CD8A Intronic Regulatory Region	Biological Region	1	GC02P086786	2.0151	https://www.genecards.org/cgi-bin/carddisp.pl?gene=LOC106699567
LOC112590816	Sharpr-MPRA Regulatory Region 6411	Biological Region	1	GC01P064917	2.0151	https://www.genecards.org/cgi-bin/carddisp.pl?gene=LOC112590816
LOC112590817	Sharpr-MPRA Regulatory Region 2453	Biological Region	1	GC01P064934	2.0151	https://www.genecards.org/cgi-bin/carddisp.pl?gene=LOC112590817
LOC117152610	DPP4 Promoter Region	Biological Region	1	GC02P162076	2.0151	https://www.genecards.org/cgi-bin/carddisp.pl?gene=LOC117152610
LOC117152611	DPP4 -4.2 Kb Glucocorticoid Response Element	Biological Region	1	GC02P162078	2.0151	https://www.genecards.org/cgi-bin/carddisp.pl?gene=LOC117152611
LOC117204000	ANPEP Distal Promoter	Biological Region	1	GC15P089814	2.0151	https://www.genecards.org/cgi-bin/carddisp.pl?gene=LOC117204000
LOC116158495	CRISPRi-Validated Cis-Regulatory Element Chr4.1814	Biological Region	1	GC04P074057	2.0151	https://www.genecards.org/cgi-bin/carddisp.pl?gene=LOC116158495
LOC116183086	CRISPRi-Validated Cis-Regulatory Element Chr7.1154	Biological Region	1	GC07P022680	2.0151	https://www.genecards.org/cgi-bin/carddisp.pl?gene=LOC116183086
LOC116183087	CRISPRi-Validated Cis-Regulatory Element Chr7.1155	Biological Region	1	GC07P022681	2.0151	https://www.genecards.org/cgi-bin/carddisp.pl?gene=LOC116183087
LOC119230225	IFNAR1 Promoter Region	Biological Region	1	GC21P033323	2.0151	https://www.genecards.org/cgi-bin/carddisp.pl?gene=LOC119230225
LOC119266102	IFNGR2 Promoter Region	Biological Region	1	GC21P033403	2.0151	https://www.genecards.org/cgi-bin/carddisp.pl?gene=LOC119266102
LOC111832671	Albumin (ALB) 5' Regulatory Region	Biological Region	1	GC04P073399	2.0151	https://www.genecards.org/cgi-bin/carddisp.pl?gene=LOC111832671
LOC116158494	CRISPRi-Validated Cis-Regulatory Element Chr4.1813	Biological Region	1	GC04P074056	2.0151	https://www.genecards.org/cgi-bin/carddisp.pl?gene=LOC116158494
LOC117204001	ANPEP Proximal Promoter	Biological Region	1	GC15P089806	2.0151	https://www.genecards.org/cgi-bin/carddisp.pl?gene=LOC117204001
LOC117693187	CTSL 3' Regulatory Element	Biological Region	1	GC09P087731	2.0151	https://www.genecards.org/cgi-bin/carddisp.pl?gene=LOC117693187
LGALS3	Galectin 3	Protein Coding	43	GC14P055124	2.01461	https://www.genecards.org/cgi-bin/carddisp.pl?gene=LGALS3
AHR	Aryl Hydrocarbon Receptor	Protein Coding	48	GC07P016916	1.9477	https://www.genecards.org/cgi-bin/carddisp.pl?gene=AHR
GZMA	Granzyme A	Protein Coding	42	GC05P055102	1.93351	https://www.genecards.org/cgi-bin/carddisp.pl?gene=GZMA
SERPING1	Serpin Family G Member 1	Protein Coding	45	GC11P057597	1.90269	https://www.genecards.org/cgi-bin/carddisp.pl?gene=SERPING1
IL10RB	Interleukin 10 Receptor Subunit Beta	Protein Coding	43	GC21P033266	1.90269	https://www.genecards.org/cgi-bin/carddisp.pl?gene=IL10RB
JUN	Jun Proto-Oncogene, AP-1 Transcription Factor Subunit	Protein Coding	48	GC01M058780	1.89429	https://www.genecards.org/cgi-bin/carddisp.pl?gene=JUN
STAT2	Signal Transducer And Activator Of Transcription 2	Protein Coding	47	GC12M056341	1.89429	https://www.genecards.org/cgi-bin/carddisp.pl?gene=STAT2
EIF2AK2	Eukaryotic Translation Initiation Factor 2 Alpha Kinase 2	Protein Coding	46	GC02M037099	1.89429	https://www.genecards.org/cgi-bin/carddisp.pl?gene=EIF2AK2
IKBKE	Inhibitor Of Nuclear Factor Kappa B Kinase Subunit Epsilon	Protein Coding	45	GC01P206470	1.89429	https://www.genecards.org/cgi-bin/carddisp.pl?gene=IKBKE
MX1	MX Dynamin Like GTPase 1	Protein Coding	41	GC21P041420	1.89429	https://www.genecards.org/cgi-bin/carddisp.pl?gene=MX1
CSF3	Colony Stimulating Factor 3	Protein Coding	38	GC17P040015	1.89429	https://www.genecards.org/cgi-bin/carddisp.pl?gene=CSF3
PLA2G7	Phospholipase A2 Group VII	Protein Coding	48	GC06M051706	1.8882	https://www.genecards.org/cgi-bin/carddisp.pl?gene=PLA2G7
TRPV1	Transient Receptor Potential Cation Channel Subfamily V Member 1	Protein Coding	45	GC17M003565	1.86918	https://www.genecards.org/cgi-bin/carddisp.pl?gene=TRPV1
TRPA1	Transient Receptor Potential Cation Channel Subfamily A Member 1	Protein Coding	45	GC08M072019	1.86918	https://www.genecards.org/cgi-bin/carddisp.pl?gene=TRPA1
IFNL2	Interferon Lambda 2	Protein Coding	35	GC19P039268	1.86918	https://www.genecards.org/cgi-bin/carddisp.pl?gene=IFNL2
CD163	CD163 Molecule	Protein Coding	41	GC12M007471	1.86397	https://www.genecards.org/cgi-bin/carddisp.pl?gene=CD163
CD8A	CD8a Molecule	Protein Coding	45	GC02M086784	1.83849	https://www.genecards.org/cgi-bin/carddisp.pl?gene=CD8A
CHRFAM7A	CHRNA7 (Exons 5-10) And FAM7A (Exons A-E) Fusion	Protein Coding	33	GC15M030360	1.83849	https://www.genecards.org/cgi-bin/carddisp.pl?gene=CHRFAM7A
SMN1	Survival Of Motor Neuron 1, Telomeric	Protein Coding	41	GC05P070924	1.81155	https://www.genecards.org/cgi-bin/carddisp.pl?gene=SMN1
S100A12	S100 Calcium Binding Protein A12	Protein Coding	38	GC01M153373	1.81155	https://www.genecards.org/cgi-bin/carddisp.pl?gene=S100A12
TICAM1	Toll Like Receptor Adaptor Molecule 1	Protein Coding	44	GC19M004815	1.806	https://www.genecards.org/cgi-bin/carddisp.pl?gene=TICAM1
FCGR1A	Fc Fragment Of IgG Receptor Ia	Protein Coding	40	GC01P149754	1.79068	https://www.genecards.org/cgi-bin/carddisp.pl?gene=FCGR1A
RB1CC1	RB1 Inducible Coiled-Coil 1	Protein Coding	42	GC08M052622	1.79004	https://www.genecards.org/cgi-bin/carddisp.pl?gene=RB1CC1
STX7	Syntaxin 7	Protein Coding	40	GC06M132445	1.79004	https://www.genecards.org/cgi-bin/carddisp.pl?gene=STX7
STX6	Syntaxin 6	Protein Coding	39	GC01M180972	1.79004	https://www.genecards.org/cgi-bin/carddisp.pl?gene=STX6
VPS16	VPS16 Core Subunit Of CORVET And HOPS Complexes	Protein Coding	36	GC20P002840	1.79004	https://www.genecards.org/cgi-bin/carddisp.pl?gene=VPS16
VPS18	VPS18 Core Subunit Of CORVET And HOPS Complexes	Protein Coding	35	GC15P040894	1.79004	https://www.genecards.org/cgi-bin/carddisp.pl?gene=VPS18
FTL	Ferritin Light Chain	Protein Coding	46	GC19P048965	1.78286	https://www.genecards.org/cgi-bin/carddisp.pl?gene=FTL
MAF	MAF BZIP Transcription Factor	Protein Coding	44	GC16M079204	1.78286	https://www.genecards.org/cgi-bin/carddisp.pl?gene=MAF
HAVCR2	Hepatitis A Virus Cellular Receptor 2	Protein Coding	42	GC05M157063	1.78286	https://www.genecards.org/cgi-bin/carddisp.pl?gene=HAVCR2
MAFB	MAF BZIP Transcription Factor B	Protein Coding	42	GC20M040685	1.78286	https://www.genecards.org/cgi-bin/carddisp.pl?gene=MAFB
FABP2	Fatty Acid Binding Protein 2	Protein Coding	41	GC04M119317	1.78286	https://www.genecards.org/cgi-bin/carddisp.pl?gene=FABP2
LAG3	Lymphocyte Activating 3	Protein Coding	36	GC12P014206	1.78286	https://www.genecards.org/cgi-bin/carddisp.pl?gene=LAG3
MIR10B	MicroRNA 10b	RNA Gene	21	GC02P176150	1.78286	https://www.genecards.org/cgi-bin/carddisp.pl?gene=MIR10B
NOS3	Nitric Oxide Synthase 3	Protein Coding	50	GC07P150990	1.75205	https://www.genecards.org/cgi-bin/carddisp.pl?gene=NOS3
G6PD	Glucose-6-Phosphate Dehydrogenase	Protein Coding	49	GC0XM154531	1.75205	https://www.genecards.org/cgi-bin/carddisp.pl?gene=G6PD
APOL1	Apolipoprotein L1	Protein Coding	43	GC22P036253	1.75205	https://www.genecards.org/cgi-bin/carddisp.pl?gene=APOL1
P2RY14	Purinergic Receptor P2Y14	Protein Coding	42	GC03M151212	1.75205	https://www.genecards.org/cgi-bin/carddisp.pl?gene=P2RY14
SREBF2	Sterol Regulatory Element Binding Transcription Factor 2	Protein Coding	42	GC22P041833	1.75205	https://www.genecards.org/cgi-bin/carddisp.pl?gene=SREBF2
LPA	Lipoprotein(A)	Protein Coding	41	GC06M160531	1.75205	https://www.genecards.org/cgi-bin/carddisp.pl?gene=LPA
TMPRSS4	Transmembrane Serine Protease 4	Protein Coding	40	GC11P118077	1.75205	https://www.genecards.org/cgi-bin/carddisp.pl?gene=TMPRSS4
PSME3	Proteasome Activator Subunit 3	Protein Coding	41	GC17P042824	1.74013	https://www.genecards.org/cgi-bin/carddisp.pl?gene=PSME3
PALS1	Protein Associated With LIN7 1, MAGUK Family Member	Protein Coding	32	GC14P067240	1.74013	https://www.genecards.org/cgi-bin/carddisp.pl?gene=PALS1
AGTR1	Angiotensin II Receptor Type 1	Protein Coding	50	GC03P148697	1.73962	https://www.genecards.org/cgi-bin/carddisp.pl?gene=AGTR1
AGER	Advanced Glycosylation End-Product Specific Receptor	Protein Coding	44	GC06M032180	1.71853	https://www.genecards.org/cgi-bin/carddisp.pl?gene=AGER
LCN2	Lipocalin 2	Protein Coding	42	GC09P128149	1.71853	https://www.genecards.org/cgi-bin/carddisp.pl?gene=LCN2
ELAVL2	ELAV Like RNA Binding Protein 2	Protein Coding	41	GC09M023690	1.71853	https://www.genecards.org/cgi-bin/carddisp.pl?gene=ELAVL2
PTGDR2	Prostaglandin D2 Receptor 2	Protein Coding	41	GC11M060850	1.71853	https://www.genecards.org/cgi-bin/carddisp.pl?gene=PTGDR2
TNFSF14	TNF Superfamily Member 14	Protein Coding	40	GC19M006663	1.71853	https://www.genecards.org/cgi-bin/carddisp.pl?gene=TNFSF14
UBE2L6	Ubiquitin Conjugating Enzyme E2 L6	Protein Coding	39	GC11M074111	1.71853	https://www.genecards.org/cgi-bin/carddisp.pl?gene=UBE2L6
KLRC2	Killer Cell Lectin Like Receptor C2	Protein Coding	36	GC12M016941	1.71853	https://www.genecards.org/cgi-bin/carddisp.pl?gene=KLRC2
TAS2R38	Taste 2 Receptor Member 38	Protein Coding	35	GC07M141972	1.71853	https://www.genecards.org/cgi-bin/carddisp.pl?gene=TAS2R38
BTK	Bruton Tyrosine Kinase	Protein Coding	52	GC0XM101349	1.68147	https://www.genecards.org/cgi-bin/carddisp.pl?gene=BTK
ITK	IL2 Inducible T Cell Kinase	Protein Coding	51	GC05P157158	1.68147	https://www.genecards.org/cgi-bin/carddisp.pl?gene=ITK
CAT	Catalase	Protein Coding	48	GC11P034460	1.68147	https://www.genecards.org/cgi-bin/carddisp.pl?gene=CAT
MIF	Macrophage Migration Inhibitory Factor	Protein Coding	48	GC22P023894	1.68147	https://www.genecards.org/cgi-bin/carddisp.pl?gene=MIF
VEGFA	Vascular Endothelial Growth Factor A	Protein Coding	47	GC06P043770	1.68147	https://www.genecards.org/cgi-bin/carddisp.pl?gene=VEGFA
PAFAH1B1	Platelet Activating Factor Acetylhydrolase 1b Regulatory Subunit 1	Protein Coding	45	GC17P002593	1.68147	https://www.genecards.org/cgi-bin/carddisp.pl?gene=PAFAH1B1
CCR1	C-C Motif Chemokine Receptor 1	Protein Coding	44	GC03M046218	1.68147	https://www.genecards.org/cgi-bin/carddisp.pl?gene=CCR1
ULK1	Unc-51 Like Autophagy Activating Kinase 1	Protein Coding	44	GC12P131894	1.68147	https://www.genecards.org/cgi-bin/carddisp.pl?gene=ULK1
FCGR3A	Fc Fragment Of IgG Receptor IIIa	Protein Coding	43	GC01M161541	1.68147	https://www.genecards.org/cgi-bin/carddisp.pl?gene=FCGR3A
ATG13	Autophagy Related 13	Protein Coding	37	GC11P046634	1.68147	https://www.genecards.org/cgi-bin/carddisp.pl?gene=ATG13
DICER1	Dicer 1, Ribonuclease III	Protein Coding	47	GC14M095086	1.67735	https://www.genecards.org/cgi-bin/carddisp.pl?gene=DICER1
SOCS1	Suppressor Of Cytokine Signaling 1	Protein Coding	42	GC16M011255	1.67509	https://www.genecards.org/cgi-bin/carddisp.pl?gene=SOCS1
KDM4B	Lysine Demethylase 4B	Protein Coding	44	GC19P004969	1.66357	https://www.genecards.org/cgi-bin/carddisp.pl?gene=KDM4B
SH3GL1	SH3 Domain Containing GRB2 Like 1, Endophilin A2	Protein Coding	42	GC19M004360	1.66357	https://www.genecards.org/cgi-bin/carddisp.pl?gene=SH3GL1
DPP9	Dipeptidyl Peptidase 9	Protein Coding	41	GC19M004675	1.66357	https://www.genecards.org/cgi-bin/carddisp.pl?gene=DPP9
ATP6V1D	ATPase H+ Transporting V1 Subunit D	Protein Coding	40	GC14M067294	1.66357	https://www.genecards.org/cgi-bin/carddisp.pl?gene=ATP6V1D
APBA3	Amyloid Beta Precursor Protein Binding Family A Member 3	Protein Coding	38	GC19M003750	1.66357	https://www.genecards.org/cgi-bin/carddisp.pl?gene=APBA3
SAFB	Scaffold Attachment Factor B	Protein Coding	38	GC19P005623	1.66357	https://www.genecards.org/cgi-bin/carddisp.pl?gene=SAFB
SAFB2	Scaffold Attachment Factor B2	Protein Coding	36	GC19M005587	1.66357	https://www.genecards.org/cgi-bin/carddisp.pl?gene=SAFB2
RAVER1	Ribonucleoprotein, PTB Binding 1	Protein Coding	33	GC19M010316	1.66357	https://www.genecards.org/cgi-bin/carddisp.pl?gene=RAVER1
MYDGF	Myeloid Derived Growth Factor	Protein Coding	32	GC19M004641	1.66357	https://www.genecards.org/cgi-bin/carddisp.pl?gene=MYDGF
HSD11B1L	Hydroxysteroid 11-Beta Dehydrogenase 1 Like	Protein Coding	31	GC19P005680	1.66357	https://www.genecards.org/cgi-bin/carddisp.pl?gene=HSD11B1L
FAM71D	Family With Sequence Similarity 71 Member D	Protein Coding	30	GC14P067189	1.66357	https://www.genecards.org/cgi-bin/carddisp.pl?gene=FAM71D
LCE2B	Late Cornified Envelope 2B	Protein Coding	26	GC01P152686	1.66357	https://www.genecards.org/cgi-bin/carddisp.pl?gene=LCE2B
LCE2A	Late Cornified Envelope 2A	Protein Coding	24	GC01P152698	1.66357	https://www.genecards.org/cgi-bin/carddisp.pl?gene=LCE2A
YJU2	YJU2 Splicing Factor Homolog	Protein Coding	23	GC19P004253	1.66357	https://www.genecards.org/cgi-bin/carddisp.pl?gene=YJU2
DPP9-AS1	DPP9 Antisense RNA 1	RNA Gene	12	GC19P004681	1.66357	https://www.genecards.org/cgi-bin/carddisp.pl?gene=DPP9-AS1
SDHDP4	Succinate Dehydrogenase Complex Subunit D Pseudogene 4	Pseudogene	8	GC03M045882	1.66357	https://www.genecards.org/cgi-bin/carddisp.pl?gene=SDHDP4
SNRPEP4	SNRPE Pseudogene 4	Pseudogene	7	GC19M005579	1.66357	https://www.genecards.org/cgi-bin/carddisp.pl?gene=SNRPEP4
ENSG00000268670	Novel Transcript, Sense Intronic To ZBTB7A	RNA Gene	7	GC19M004062	1.66357	https://www.genecards.org/cgi-bin/carddisp.pl?gene=ENSG00000268670
ENSG00000269807	Novel Transcript, Antisense To MPND	RNA Gene	7	GC19M004348	1.66357	https://www.genecards.org/cgi-bin/carddisp.pl?gene=ENSG00000269807
ENSG00000267030	Novel Transcript, Antisense To UBXN6	RNA Gene	7	GC19P004447	1.66357	https://www.genecards.org/cgi-bin/carddisp.pl?gene=ENSG00000267030
ENSG00000267255	Novel Transcript, Antisense To CHAF1A	RNA Gene	7	GC19M004429	1.66357	https://www.genecards.org/cgi-bin/carddisp.pl?gene=ENSG00000267255
ENSG00000257452	Novel Transcript, Antisense To OAS1, OAS2 And OAS3	RNA Gene	7	GC12M112907	1.66357	https://www.genecards.org/cgi-bin/carddisp.pl?gene=ENSG00000257452
ENSG00000267769	Novel Transcript, Antisense To UBX6	RNA Gene	6	GC19P004454	1.66357	https://www.genecards.org/cgi-bin/carddisp.pl?gene=ENSG00000267769
ENSG00000267303	Novel Transcript	Protein Coding	6	GC19M010315	1.66357	https://www.genecards.org/cgi-bin/carddisp.pl?gene=ENSG00000267303
ENSG00000288720	Novel Transcript	RNA Gene	4	GC03P045795	1.66357	https://www.genecards.org/cgi-bin/carddisp.pl?gene=ENSG00000288720
ENSG00000285788	Novel Transcript	RNA Gene	4	GC03P045842	1.66357	https://www.genecards.org/cgi-bin/carddisp.pl?gene=ENSG00000285788
lnc-FYCO1-5		RNA Gene	4	GC03M045835	1.66357	https://www.genecards.org/cgi-bin/carddisp.pl?gene=lnc-FYCO1-5
HSALNG0123410		RNA Gene	4	GC19M004676	1.66357	https://www.genecards.org/cgi-bin/carddisp.pl?gene=HSALNG0123410
lnc-MYDGF-2		RNA Gene	3	GC19M004714	1.66357	https://www.genecards.org/cgi-bin/carddisp.pl?gene=lnc-MYDGF-2
HSALNG0123412		RNA Gene	3	GC19P004847	1.66357	https://www.genecards.org/cgi-bin/carddisp.pl?gene=HSALNG0123412
lnc-SLC6A20-4		RNA Gene	3	GC03M045827	1.66357	https://www.genecards.org/cgi-bin/carddisp.pl?gene=lnc-SLC6A20-4
HSALNG0123411		RNA Gene	2	GC19P004705	1.66357	https://www.genecards.org/cgi-bin/carddisp.pl?gene=HSALNG0123411
MK280073-186		RNA Gene	2	GC14M066585	1.66357	https://www.genecards.org/cgi-bin/carddisp.pl?gene=MK280073-186
NONHSAG012343.2		RNA Gene	2	GC12P112919	1.66357	https://www.genecards.org/cgi-bin/carddisp.pl?gene=NONHSAG012343.2
piR-32810-041		RNA Gene	2	GC14P066703	1.66357	https://www.genecards.org/cgi-bin/carddisp.pl?gene=piR-32810-041
piR-50968-032		RNA Gene	2	GC12P112927	1.66357	https://www.genecards.org/cgi-bin/carddisp.pl?gene=piR-50968-032
P2RX7	Purinergic Receptor P2X 7	Protein Coding	45	GC12P124172	1.63939	https://www.genecards.org/cgi-bin/carddisp.pl?gene=P2RX7
SPP1	Secreted Phosphoprotein 1	Protein Coding	45	GC04P087975	1.63939	https://www.genecards.org/cgi-bin/carddisp.pl?gene=SPP1
BDKRB1	Bradykinin Receptor B1	Protein Coding	42	GC14P096278	1.63939	https://www.genecards.org/cgi-bin/carddisp.pl?gene=BDKRB1
LGALS9	Galectin 9	Protein Coding	38	GC17P027629	1.63939	https://www.genecards.org/cgi-bin/carddisp.pl?gene=LGALS9
TRAF3	TNF Receptor Associated Factor 3	Protein Coding	46	GC14P107001	1.63888	https://www.genecards.org/cgi-bin/carddisp.pl?gene=TRAF3
ELANE	Elastase, Neutrophil Expressed	Protein Coding	45	GC19P000889	1.62383	https://www.genecards.org/cgi-bin/carddisp.pl?gene=ELANE
PDCD1	Programmed Cell Death 1	Protein Coding	46	GC02M241849	1.60584	https://www.genecards.org/cgi-bin/carddisp.pl?gene=PDCD1
CTLA4	Cytotoxic T-Lymphocyte Associated Protein 4	Protein Coding	44	GC02P203867	1.60584	https://www.genecards.org/cgi-bin/carddisp.pl?gene=CTLA4
CD274	CD274 Molecule	Protein Coding	43	GC09P005450	1.60584	https://www.genecards.org/cgi-bin/carddisp.pl?gene=CD274
PIK3C3	Phosphatidylinositol 3-Kinase Catalytic Subunit Type 3	Protein Coding	48	GC18P041955	1.58949	https://www.genecards.org/cgi-bin/carddisp.pl?gene=PIK3C3
FPR1	Formyl Peptide Receptor 1	Protein Coding	47	GC19M051745	1.58949	https://www.genecards.org/cgi-bin/carddisp.pl?gene=FPR1
ATF4	Activating Transcription Factor 4	Protein Coding	45	GC22P039565	1.58949	https://www.genecards.org/cgi-bin/carddisp.pl?gene=ATF4
IDO1	Indoleamine 2,3-Dioxygenase 1	Protein Coding	44	GC08P039891	1.58949	https://www.genecards.org/cgi-bin/carddisp.pl?gene=IDO1
SOD3	Superoxide Dismutase 3	Protein Coding	40	GC04P024798	1.58949	https://www.genecards.org/cgi-bin/carddisp.pl?gene=SOD3
VPS33A	VPS33A Core Subunit Of CORVET And HOPS Complexes	Protein Coding	40	GC12M122229	1.58949	https://www.genecards.org/cgi-bin/carddisp.pl?gene=VPS33A
CXCL3	C-X-C Motif Chemokine Ligand 3	Protein Coding	37	GC04M074036	1.58949	https://www.genecards.org/cgi-bin/carddisp.pl?gene=CXCL3
ATG14	Autophagy Related 14	Protein Coding	36	GC14M055366	1.58949	https://www.genecards.org/cgi-bin/carddisp.pl?gene=ATG14
FNDC5	Fibronectin Type III Domain Containing 5	Protein Coding	33	GC01M032886	1.58949	https://www.genecards.org/cgi-bin/carddisp.pl?gene=FNDC5
OR51E2	Olfactory Receptor Family 51 Subfamily E Member 2	Protein Coding	33	GC11M004680	1.58949	https://www.genecards.org/cgi-bin/carddisp.pl?gene=OR51E2
MIR146A	MicroRNA 146a	RNA Gene	22	GC05P160485	1.58949	https://www.genecards.org/cgi-bin/carddisp.pl?gene=MIR146A
MIR1207	MicroRNA 1207	RNA Gene	14	GC08P128049	1.58949	https://www.genecards.org/cgi-bin/carddisp.pl?gene=MIR1207
MAPK1	Mitogen-Activated Protein Kinase 1	Protein Coding	51	GC22M021759	1.58898	https://www.genecards.org/cgi-bin/carddisp.pl?gene=MAPK1
MAPK3	Mitogen-Activated Protein Kinase 3	Protein Coding	48	GC16M032181	1.58898	https://www.genecards.org/cgi-bin/carddisp.pl?gene=MAPK3
RSL24D1	Ribosomal L24 Domain Containing 1	Protein Coding	37	GC15M055180	1.58898	https://www.genecards.org/cgi-bin/carddisp.pl?gene=RSL24D1
CXCL5	C-X-C Motif Chemokine Ligand 5	Protein Coding	40	GC04M073995	1.5624	https://www.genecards.org/cgi-bin/carddisp.pl?gene=CXCL5
IL13	Interleukin 13	Protein Coding	43	GC05P132656	1.54335	https://www.genecards.org/cgi-bin/carddisp.pl?gene=IL13
AKT1	AKT Serine/Threonine Kinase 1	Protein Coding	52	GC14M104769	1.52445	https://www.genecards.org/cgi-bin/carddisp.pl?gene=AKT1
MTHFR	Methylenetetrahydrofolate Reductase	Protein Coding	48	GC01M011785	1.52445	https://www.genecards.org/cgi-bin/carddisp.pl?gene=MTHFR
SOCS3	Suppressor Of Cytokine Signaling 3	Protein Coding	43	GC17M078356	1.52445	https://www.genecards.org/cgi-bin/carddisp.pl?gene=SOCS3
CCL20	C-C Motif Chemokine Ligand 20	Protein Coding	42	GC02P227823	1.52445	https://www.genecards.org/cgi-bin/carddisp.pl?gene=CCL20
PSMD1	Proteasome 26S Subunit, Non-ATPase 1	Protein Coding	39	GC02P231056	1.52445	https://www.genecards.org/cgi-bin/carddisp.pl?gene=PSMD1
SLCO4C1	Solute Carrier Organic Anion Transporter Family Member 4C1	Protein Coding	36	GC05M102233	1.52445	https://www.genecards.org/cgi-bin/carddisp.pl?gene=SLCO4C1
IRAK1	Interleukin 1 Receptor Associated Kinase 1	Protein Coding	49	GC0XM154010	1.52394	https://www.genecards.org/cgi-bin/carddisp.pl?gene=IRAK1
IL6ST	Interleukin 6 Cytokine Family Signal Transducer	Protein Coding	46	GC05M055935	1.52394	https://www.genecards.org/cgi-bin/carddisp.pl?gene=IL6ST
FGB	Fibrinogen Beta Chain	Protein Coding	45	GC04P154578	1.52394	https://www.genecards.org/cgi-bin/carddisp.pl?gene=FGB
RPL39	Ribosomal Protein L39	Protein Coding	33	GC0XM119786	1.52394	https://www.genecards.org/cgi-bin/carddisp.pl?gene=RPL39
ITGB3	Integrin Subunit Beta 3	Protein Coding	49	GC17P047261	1.52098	https://www.genecards.org/cgi-bin/carddisp.pl?gene=ITGB3
KLRC1	Killer Cell Lectin Like Receptor C1	Protein Coding	40	GC12M016942	1.51807	https://www.genecards.org/cgi-bin/carddisp.pl?gene=KLRC1
ITGAM	Integrin Subunit Alpha M	Protein Coding	46	GC16P034583	1.4768	https://www.genecards.org/cgi-bin/carddisp.pl?gene=ITGAM
IGHMBP2	Immunoglobulin Mu DNA Binding Protein 2	Protein Coding	41	GC11P068903	1.4768	https://www.genecards.org/cgi-bin/carddisp.pl?gene=IGHMBP2
TRIP4	Thyroid Hormone Receptor Interactor 4	Protein Coding	40	GC15P080587	1.4768	https://www.genecards.org/cgi-bin/carddisp.pl?gene=TRIP4
TK2	Thymidine Kinase 2	Protein Coding	40	GC16M066508	1.4768	https://www.genecards.org/cgi-bin/carddisp.pl?gene=TK2
SFTPD	Surfactant Protein D	Protein Coding	42	GC10M079937	1.41716	https://www.genecards.org/cgi-bin/carddisp.pl?gene=SFTPD
B2M	Beta-2-Microglobulin	Protein Coding	47	GC15P044711	1.41176	https://www.genecards.org/cgi-bin/carddisp.pl?gene=B2M
ANXA5	Annexin A5	Protein Coding	45	GC04M121667	1.41176	https://www.genecards.org/cgi-bin/carddisp.pl?gene=ANXA5
CD81	CD81 Molecule	Protein Coding	45	GC11P002454	1.41176	https://www.genecards.org/cgi-bin/carddisp.pl?gene=CD81
FKRP	Fukutin Related Protein	Protein Coding	40	GC19P046746	1.41176	https://www.genecards.org/cgi-bin/carddisp.pl?gene=FKRP
ERG	ETS Transcription Factor ERG	Protein Coding	45	GC21M038367	1.36743	https://www.genecards.org/cgi-bin/carddisp.pl?gene=ERG
CCL7	C-C Motif Chemokine Ligand 7	Protein Coding	41	GC17P034270	1.36743	https://www.genecards.org/cgi-bin/carddisp.pl?gene=CCL7
PNPLA3	Patatin Like Phospholipase Domain Containing 3	Protein Coding	40	GC22P043923	1.36743	https://www.genecards.org/cgi-bin/carddisp.pl?gene=PNPLA3
TNNI1	Troponin I1, Slow Skeletal Type	Protein Coding	39	GC01M201404	1.36743	https://www.genecards.org/cgi-bin/carddisp.pl?gene=TNNI1
ESM1	Endothelial Cell Specific Molecule 1	Protein Coding	38	GC05M054977	1.36743	https://www.genecards.org/cgi-bin/carddisp.pl?gene=ESM1
PARP14	Poly(ADP-Ribose) Polymerase Family Member 14	Protein Coding	36	GC03P122680	1.36743	https://www.genecards.org/cgi-bin/carddisp.pl?gene=PARP14
TAS2R1	Taste 2 Receptor Member 1	Protein Coding	36	GC05M009630	1.36743	https://www.genecards.org/cgi-bin/carddisp.pl?gene=TAS2R1
GSTT1	Glutathione S-Transferase Theta 1	Protein Coding	32	GC22Mi00270	1.36743	https://www.genecards.org/cgi-bin/carddisp.pl?gene=GSTT1
MIR451A	MicroRNA 451a	RNA Gene	18	GC17M028861	1.36743	https://www.genecards.org/cgi-bin/carddisp.pl?gene=MIR451A
RELA	RELA Proto-Oncogene, NF-KB Subunit	Protein Coding	50	GC11M065653	1.36692	https://www.genecards.org/cgi-bin/carddisp.pl?gene=RELA
DCTN1	Dynactin Subunit 1	Protein Coding	46	GC02M074361	1.27567	https://www.genecards.org/cgi-bin/carddisp.pl?gene=DCTN1
CFTR	CF Transmembrane Conductance Regulator	Protein Coding	50	GC07P117287	1.26014	https://www.genecards.org/cgi-bin/carddisp.pl?gene=CFTR
MPO	Myeloperoxidase	Protein Coding	49	GC17M058269	1.26014	https://www.genecards.org/cgi-bin/carddisp.pl?gene=MPO
CD4	CD4 Molecule	Protein Coding	48	GC12P006786	1.26014	https://www.genecards.org/cgi-bin/carddisp.pl?gene=CD4
CD40LG	CD40 Ligand	Protein Coding	46	GC0XP136649	1.26014	https://www.genecards.org/cgi-bin/carddisp.pl?gene=CD40LG
PIK3C2A	Phosphatidylinositol-4-Phosphate 3-Kinase Catalytic Subunit Type 2 Alpha	Protein Coding	46	GC11M017336	1.26014	https://www.genecards.org/cgi-bin/carddisp.pl?gene=PIK3C2A
IL5	Interleukin 5	Protein Coding	43	GC05M132541	1.26014	https://www.genecards.org/cgi-bin/carddisp.pl?gene=IL5
SFTPB	Surfactant Protein B	Protein Coding	43	GC02M085657	1.26014	https://www.genecards.org/cgi-bin/carddisp.pl?gene=SFTPB
SFTPC	Surfactant Protein C	Protein Coding	43	GC08P022156	1.26014	https://www.genecards.org/cgi-bin/carddisp.pl?gene=SFTPC
CCL11	C-C Motif Chemokine Ligand 11	Protein Coding	42	GC17P034285	1.26014	https://www.genecards.org/cgi-bin/carddisp.pl?gene=CCL11
SCGB1A1	Secretoglobin Family 1A Member 1	Protein Coding	39	GC11P062405	1.26014	https://www.genecards.org/cgi-bin/carddisp.pl?gene=SCGB1A1
H2AC18	H2A Clustered Histone 18	Protein Coding	26	GC01M150279	1.26014	https://www.genecards.org/cgi-bin/carddisp.pl?gene=H2AC18
RAB7A	RAB7A, Member RAS Oncogene Family	Protein Coding	47	GC03P132071	1.25734	https://www.genecards.org/cgi-bin/carddisp.pl?gene=RAB7A
TOMM70	Translocase Of Outer Mitochondrial Membrane 70	Protein Coding	30	GC03M100364	1.25734	https://www.genecards.org/cgi-bin/carddisp.pl?gene=TOMM70
ANPEP	Alanyl Aminopeptidase, Membrane	Protein Coding	49	GC15M089784	1.25474	https://www.genecards.org/cgi-bin/carddisp.pl?gene=ANPEP
MMP12	Matrix Metallopeptidase 12	Protein Coding	44	GC11M102862	1.25474	https://www.genecards.org/cgi-bin/carddisp.pl?gene=MMP12
IL17RA	Interleukin 17 Receptor A	Protein Coding	43	GC22P017154	1.23805	https://www.genecards.org/cgi-bin/carddisp.pl?gene=IL17RA
TARS2	Threonyl-TRNA Synthetase 2, Mitochondrial	Protein Coding	42	GC01P150511	1.17385	https://www.genecards.org/cgi-bin/carddisp.pl?gene=TARS2
GTF2F2	General Transcription Factor IIF Subunit 2	Protein Coding	41	GC13P045120	1.17385	https://www.genecards.org/cgi-bin/carddisp.pl?gene=GTF2F2
RAP1GDS1	Rap1 GTPase-GDP Dissociation Stimulator 1	Protein Coding	41	GC04P098261	1.17385	https://www.genecards.org/cgi-bin/carddisp.pl?gene=RAP1GDS1
RAB14	RAB14, Member RAS Oncogene Family	Protein Coding	40	GC09M121178	1.17385	https://www.genecards.org/cgi-bin/carddisp.pl?gene=RAB14
RAE1	Ribonucleic Acid Export 1	Protein Coding	40	GC20P057351	1.17385	https://www.genecards.org/cgi-bin/carddisp.pl?gene=RAE1
REEP5	Receptor Accessory Protein 5	Protein Coding	40	GC05M112876	1.17385	https://www.genecards.org/cgi-bin/carddisp.pl?gene=REEP5
GIGYF2	GRB10 Interacting GYF Protein 2	Protein Coding	39	GC02P232698	1.17385	https://www.genecards.org/cgi-bin/carddisp.pl?gene=GIGYF2
G3BP1	G3BP Stress Granule Assembly Factor 1	Protein Coding	39	GC05P151771	1.17385	https://www.genecards.org/cgi-bin/carddisp.pl?gene=G3BP1
ALG5	ALG5 Dolichyl-Phosphate Beta-Glucosyltransferase	Protein Coding	38	GC13M036949	1.17385	https://www.genecards.org/cgi-bin/carddisp.pl?gene=ALG5
CLCC1	Chloride Channel CLIC Like 1	Protein Coding	38	GC01M108958	1.17385	https://www.genecards.org/cgi-bin/carddisp.pl?gene=CLCC1
UGGT2	UDP-Glucose Glycoprotein Glucosyltransferase 2	Protein Coding	37	GC13M095801	1.17385	https://www.genecards.org/cgi-bin/carddisp.pl?gene=UGGT2
G3BP2	G3BP Stress Granule Assembly Factor 2	Protein Coding	36	GC04M075642	1.17385	https://www.genecards.org/cgi-bin/carddisp.pl?gene=G3BP2
GOLGB1	Golgin B1	Protein Coding	36	GC03M121663	1.17385	https://www.genecards.org/cgi-bin/carddisp.pl?gene=GOLGB1
TRIM59	Tripartite Motif Containing 59	Protein Coding	34	GC03M160432	1.17385	https://www.genecards.org/cgi-bin/carddisp.pl?gene=TRIM59
CFD	Complement Factor D	Protein Coding	44	GC19P000859	1.16025	https://www.genecards.org/cgi-bin/carddisp.pl?gene=CFD
CGAS	Cyclic GMP-AMP Synthase	Protein Coding	29	GC06M073414	1.16025	https://www.genecards.org/cgi-bin/carddisp.pl?gene=CGAS
AP2M1	Adaptor Related Protein Complex 2 Subunit Mu 1	Protein Coding	44	GC03P184174	1.11199	https://www.genecards.org/cgi-bin/carddisp.pl?gene=AP2M1
USP13	Ubiquitin Specific Peptidase 13	Protein Coding	44	GC03P179652	1.11199	https://www.genecards.org/cgi-bin/carddisp.pl?gene=USP13
PABPC4	Poly(A) Binding Protein Cytoplasmic 4	Protein Coding	41	GC01M039560	1.10098	https://www.genecards.org/cgi-bin/carddisp.pl?gene=PABPC4
KPNA2	Karyopherin Subunit Alpha 2	Protein Coding	44	GC17P068035	1.07848	https://www.genecards.org/cgi-bin/carddisp.pl?gene=KPNA2
ATP1B1	ATPase Na+/K+ Transporting Subunit Beta 1	Protein Coding	46	GC01P169105	1.0351	https://www.genecards.org/cgi-bin/carddisp.pl?gene=ATP1B1
PLOD2	Procollagen-Lysine,2-Oxoglutarate 5-Dioxygenase 2	Protein Coding	45	GC03M146069	1.0351	https://www.genecards.org/cgi-bin/carddisp.pl?gene=PLOD2
SIRT5	Sirtuin 5	Protein Coding	44	GC06P013574	1.0351	https://www.genecards.org/cgi-bin/carddisp.pl?gene=SIRT5
HYOU1	Hypoxia Up-Regulated 1	Protein Coding	43	GC11M119053	1.0351	https://www.genecards.org/cgi-bin/carddisp.pl?gene=HYOU1
NUP214	Nucleoporin 214	Protein Coding	43	GC09P131125	1.0351	https://www.genecards.org/cgi-bin/carddisp.pl?gene=NUP214
EIF4H	Eukaryotic Translation Initiation Factor 4H	Protein Coding	41	GC07P074174	1.0351	https://www.genecards.org/cgi-bin/carddisp.pl?gene=EIF4H
ERC1	ELKS/RAB6-Interacting/CAST Family Member 1	Protein Coding	41	GC12P000972	1.0351	https://www.genecards.org/cgi-bin/carddisp.pl?gene=ERC1
NIN	Ninein	Protein Coding	41	GC14M050719	1.0351	https://www.genecards.org/cgi-bin/carddisp.pl?gene=NIN
PCNT	Pericentrin	Protein Coding	41	GC21P046324	1.0351	https://www.genecards.org/cgi-bin/carddisp.pl?gene=PCNT
ERP44	Endoplasmic Reticulum Protein 44	Protein Coding	40	GC09M099979	1.0351	https://www.genecards.org/cgi-bin/carddisp.pl?gene=ERP44
FKBP10	FKBP Prolyl Isomerase 10	Protein Coding	40	GC17P041812	1.0351	https://www.genecards.org/cgi-bin/carddisp.pl?gene=FKBP10
SIL1	SIL1 Nucleotide Exchange Factor	Protein Coding	40	GC05M138957	1.0351	https://www.genecards.org/cgi-bin/carddisp.pl?gene=SIL1
CEP250	Centrosomal Protein 250	Protein Coding	38	GC20P035455	1.0351	https://www.genecards.org/cgi-bin/carddisp.pl?gene=CEP250
CEP135	Centrosomal Protein 135	Protein Coding	38	GC04P055948	1.0351	https://www.genecards.org/cgi-bin/carddisp.pl?gene=CEP135
HECTD1	HECT Domain E3 Ubiquitin Protein Ligase 1	Protein Coding	38	GC14M031100	1.0351	https://www.genecards.org/cgi-bin/carddisp.pl?gene=HECTD1
MYCBP2	MYC Binding Protein 2	Protein Coding	37	GC13M077044	1.0351	https://www.genecards.org/cgi-bin/carddisp.pl?gene=MYCBP2
CHPF2	Chondroitin Polymerizing Factor 2	Protein Coding	36	GC07P151232	1.0351	https://www.genecards.org/cgi-bin/carddisp.pl?gene=CHPF2
CNTRL	Centriolin	Protein Coding	36	GC09P121074	1.0351	https://www.genecards.org/cgi-bin/carddisp.pl?gene=CNTRL
ERLEC1	Endoplasmic Reticulum Lectin 1	Protein Coding	36	GC02P053786	1.0351	https://www.genecards.org/cgi-bin/carddisp.pl?gene=ERLEC1
AKAP8L	A-Kinase Anchoring Protein 8 Like	Protein Coding	35	GC19M015380	1.0351	https://www.genecards.org/cgi-bin/carddisp.pl?gene=AKAP8L
GOLGA3	Golgin A3	Protein Coding	35	GC12M132768	1.0351	https://www.genecards.org/cgi-bin/carddisp.pl?gene=GOLGA3
DNAJC11	DnaJ Heat Shock Protein Family (Hsp40) Member C11	Protein Coding	34	GC01M006634	1.0351	https://www.genecards.org/cgi-bin/carddisp.pl?gene=DNAJC11
EDEM3	ER Degradation Enhancing Alpha-Mannosidase Like Protein 3	Protein Coding	34	GC01M184690	1.0351	https://www.genecards.org/cgi-bin/carddisp.pl?gene=EDEM3
ARL6IP6	ADP Ribosylation Factor Like GTPase 6 Interacting Protein 6	Protein Coding	34	GC02P152717	1.0351	https://www.genecards.org/cgi-bin/carddisp.pl?gene=ARL6IP6
CCDC86	Coiled-Coil Domain Containing 86	Protein Coding	33	GC11P060878	1.0351	https://www.genecards.org/cgi-bin/carddisp.pl?gene=CCDC86
SPART	Spartin	Protein Coding	32	GC13M036302	1.0351	https://www.genecards.org/cgi-bin/carddisp.pl?gene=SPART
COMT	Catechol-O-Methyltransferase	Protein Coding	50	GC22P019941	1.01454	https://www.genecards.org/cgi-bin/carddisp.pl?gene=COMT
RIPK1	Receptor Interacting Serine/Threonine Kinase 1	Protein Coding	48	GC06P003073	1.01454	https://www.genecards.org/cgi-bin/carddisp.pl?gene=RIPK1
ADAM9	ADAM Metallopeptidase Domain 9	Protein Coding	46	GC08P038996	1.01454	https://www.genecards.org/cgi-bin/carddisp.pl?gene=ADAM9
CSNK2A2	Casein Kinase 2 Alpha 2	Protein Coding	46	GC16M058157	1.01454	https://www.genecards.org/cgi-bin/carddisp.pl?gene=CSNK2A2
SCARB1	Scavenger Receptor Class B Member 1	Protein Coding	45	GC12M124776	1.01454	https://www.genecards.org/cgi-bin/carddisp.pl?gene=SCARB1
NEK9	NIMA Related Kinase 9	Protein Coding	45	GC14M075079	1.01454	https://www.genecards.org/cgi-bin/carddisp.pl?gene=NEK9
PVR	PVR Cell Adhesion Molecule	Protein Coding	44	GC19P044644	1.01454	https://www.genecards.org/cgi-bin/carddisp.pl?gene=PVR
RTN4	Reticulon 4	Protein Coding	44	GC02M054934	1.01454	https://www.genecards.org/cgi-bin/carddisp.pl?gene=RTN4
TOR1A	Torsin Family 1 Member A	Protein Coding	44	GC09M129812	1.01454	https://www.genecards.org/cgi-bin/carddisp.pl?gene=TOR1A
PMPCA	Peptidase, Mitochondrial Processing Subunit Alpha	Protein Coding	43	GC09P136410	1.01454	https://www.genecards.org/cgi-bin/carddisp.pl?gene=PMPCA
ATP6AP1	ATPase H+ Transporting Accessory Protein 1	Protein Coding	42	GC0XP154428	1.01454	https://www.genecards.org/cgi-bin/carddisp.pl?gene=ATP6AP1
GGH	Gamma-Glutamyl Hydrolase	Protein Coding	42	GC08M063015	1.01454	https://www.genecards.org/cgi-bin/carddisp.pl?gene=GGH
PMPCB	Peptidase, Mitochondrial Processing Subunit Beta	Protein Coding	42	GC07P103297	1.01454	https://www.genecards.org/cgi-bin/carddisp.pl?gene=PMPCB
RAB2A	RAB2A, Member RAS Oncogene Family	Protein Coding	42	GC08P060516	1.01454	https://www.genecards.org/cgi-bin/carddisp.pl?gene=RAB2A
NUP98	Nucleoporin 98 And 96 Precursor	Protein Coding	42	GC11M003671	1.01454	https://www.genecards.org/cgi-bin/carddisp.pl?gene=NUP98
NARS2	Asparaginyl-TRNA Synthetase 2, Mitochondrial	Protein Coding	42	GC11M078435	1.01454	https://www.genecards.org/cgi-bin/carddisp.pl?gene=NARS2
PLD3	Phospholipase D Family Member 3	Protein Coding	42	GC19P040348	1.01454	https://www.genecards.org/cgi-bin/carddisp.pl?gene=PLD3
RAB1A	RAB1A, Member RAS Oncogene Family	Protein Coding	41	GC02M065072	1.01454	https://www.genecards.org/cgi-bin/carddisp.pl?gene=RAB1A
VPS11	VPS11 Core Subunit Of CORVET And HOPS Complexes	Protein Coding	41	GC11P119067	1.01454	https://www.genecards.org/cgi-bin/carddisp.pl?gene=VPS11
HS6ST2	Heparan Sulfate 6-O-Sulfotransferase 2	Protein Coding	40	GC0XM132626	1.01454	https://www.genecards.org/cgi-bin/carddisp.pl?gene=HS6ST2
EIF4E2	Eukaryotic Translation Initiation Factor 4E Family Member 2	Protein Coding	40	GC02P232550	1.01454	https://www.genecards.org/cgi-bin/carddisp.pl?gene=EIF4E2
PDE4DIP	Phosphodiesterase 4D Interacting Protein	Protein Coding	40	GC01P148808	1.01454	https://www.genecards.org/cgi-bin/carddisp.pl?gene=PDE4DIP
ALG11	ALG11 Alpha-1,2-Mannosyltransferase	Protein Coding	39	GC13P052012	1.01454	https://www.genecards.org/cgi-bin/carddisp.pl?gene=ALG11
ATE1	Arginyltransferase 1	Protein Coding	39	GC10M121740	1.01454	https://www.genecards.org/cgi-bin/carddisp.pl?gene=ATE1
RAB8A	RAB8A, Member RAS Oncogene Family	Protein Coding	39	GC19P016111	1.01454	https://www.genecards.org/cgi-bin/carddisp.pl?gene=RAB8A
PITRM1	Pitrilysin Metallopeptidase 1	Protein Coding	39	GC10M003138	1.01454	https://www.genecards.org/cgi-bin/carddisp.pl?gene=PITRM1
ANO6	Anoctamin 6	Protein Coding	38	GC12P045215	1.01454	https://www.genecards.org/cgi-bin/carddisp.pl?gene=ANO6
NPTX1	Neuronal Pentraxin 1	Protein Coding	37	GC17M080466	1.01454	https://www.genecards.org/cgi-bin/carddisp.pl?gene=NPTX1
LMAN2	Lectin, Mannose Binding 2	Protein Coding	37	GC05M177583	1.01454	https://www.genecards.org/cgi-bin/carddisp.pl?gene=LMAN2
MDN1	Midasin AAA ATPase 1	Protein Coding	37	GC06M089642	1.01454	https://www.genecards.org/cgi-bin/carddisp.pl?gene=MDN1
MTCH1	Mitochondrial Carrier 1	Protein Coding	37	GC06M051567	1.01454	https://www.genecards.org/cgi-bin/carddisp.pl?gene=MTCH1
ATP13A3	ATPase 13A3	Protein Coding	36	GC03M194402	1.01454	https://www.genecards.org/cgi-bin/carddisp.pl?gene=ATP13A3
GOLGA7	Golgin A7	Protein Coding	36	GC08P041467	1.01454	https://www.genecards.org/cgi-bin/carddisp.pl?gene=GOLGA7
INTS4	Integrator Complex Subunit 4	Protein Coding	36	GC11M077878	1.01454	https://www.genecards.org/cgi-bin/carddisp.pl?gene=INTS4
ZDHHC5	Zinc Finger DHHC-Type Palmitoyltransferase 5	Protein Coding	36	GC11P057670	1.01454	https://www.genecards.org/cgi-bin/carddisp.pl?gene=ZDHHC5
QSOX2	Quiescin Sulfhydryl Oxidase 2	Protein Coding	35	GC09M136206	1.01454	https://www.genecards.org/cgi-bin/carddisp.pl?gene=QSOX2
SCCPDH	Saccharopine Dehydrogenase (Putative)	Protein Coding	35	GC01P246724	1.01454	https://www.genecards.org/cgi-bin/carddisp.pl?gene=SCCPDH
TIMM10B	Translocase Of Inner Mitochondrial Membrane 10B	Protein Coding	34	GC11P006482	1.01454	https://www.genecards.org/cgi-bin/carddisp.pl?gene=TIMM10B
FAM8A1	Family With Sequence Similarity 8 Member A1	Protein Coding	33	GC06P017600	1.01454	https://www.genecards.org/cgi-bin/carddisp.pl?gene=FAM8A1
COQ8B	Coenzyme Q8B	Protein Coding	32	GC19M051143	1.01454	https://www.genecards.org/cgi-bin/carddisp.pl?gene=COQ8B
SELENOS	Selenoprotein S	Protein Coding	31	GC15M109947	1.01454	https://www.genecards.org/cgi-bin/carddisp.pl?gene=SELENOS
FAM98A	Family With Sequence Similarity 98 Member A	Protein Coding	30	GC02M033583	1.01454	https://www.genecards.org/cgi-bin/carddisp.pl?gene=FAM98A
HLA-DRB1	Major Histocompatibility Complex, Class II, DR Beta 1	Protein Coding	46	GC06M032578	1.00374	https://www.genecards.org/cgi-bin/carddisp.pl?gene=HLA-DRB1
PIK3CD	Phosphatidylinositol-4,5-Bisphosphate 3-Kinase Catalytic Subunit Delta	Protein Coding	53	GC01P009629	1.00323	https://www.genecards.org/cgi-bin/carddisp.pl?gene=PIK3CD
IKBKB	Inhibitor Of Nuclear Factor Kappa B Kinase Subunit Beta	Protein Coding	52	GC08P042271	1.00323	https://www.genecards.org/cgi-bin/carddisp.pl?gene=IKBKB
PIK3CA	Phosphatidylinositol-4,5-Bisphosphate 3-Kinase Catalytic Subunit Alpha	Protein Coding	52	GC03P179148	1.00323	https://www.genecards.org/cgi-bin/carddisp.pl?gene=PIK3CA
CHUK	Component Of Inhibitor Of Nuclear Factor Kappa B Kinase Complex	Protein Coding	51	GC10M100188	1.00323	https://www.genecards.org/cgi-bin/carddisp.pl?gene=CHUK
NFKB1	Nuclear Factor Kappa B Subunit 1	Protein Coding	51	GC04P102501	1.00323	https://www.genecards.org/cgi-bin/carddisp.pl?gene=NFKB1
PRKCG	Protein Kinase C Gamma	Protein Coding	51	GC19P053879	1.00323	https://www.genecards.org/cgi-bin/carddisp.pl?gene=PRKCG
MMP1	Matrix Metallopeptidase 1	Protein Coding	50	GC11M102810	1.00323	https://www.genecards.org/cgi-bin/carddisp.pl?gene=MMP1
MAPK10	Mitogen-Activated Protein Kinase 10	Protein Coding	50	GC04M085990	1.00323	https://www.genecards.org/cgi-bin/carddisp.pl?gene=MAPK10
MAP3K7	Mitogen-Activated Protein Kinase Kinase Kinase 7	Protein Coding	50	GC06M090513	1.00323	https://www.genecards.org/cgi-bin/carddisp.pl?gene=MAP3K7
MAPK14	Mitogen-Activated Protein Kinase 14	Protein Coding	50	GC06P061307	1.00323	https://www.genecards.org/cgi-bin/carddisp.pl?gene=MAPK14
PIK3R1	Phosphoinositide-3-Kinase Regulatory Subunit 1	Protein Coding	50	GC05P068215	1.00323	https://www.genecards.org/cgi-bin/carddisp.pl?gene=PIK3R1
PLCG2	Phospholipase C Gamma 2	Protein Coding	50	GC16P081773	1.00323	https://www.genecards.org/cgi-bin/carddisp.pl?gene=PLCG2
PRKCA	Protein Kinase C Alpha	Protein Coding	50	GC17P066302	1.00323	https://www.genecards.org/cgi-bin/carddisp.pl?gene=PRKCA
CASP1	Caspase 1	Protein Coding	49	GC11M105025	1.00323	https://www.genecards.org/cgi-bin/carddisp.pl?gene=CASP1
FOS	Fos Proto-Oncogene, AP-1 Transcription Factor Subunit	Protein Coding	49	GC14P075278	1.00323	https://www.genecards.org/cgi-bin/carddisp.pl?gene=FOS
MAPK8	Mitogen-Activated Protein Kinase 8	Protein Coding	49	GC10P048306	1.00323	https://www.genecards.org/cgi-bin/carddisp.pl?gene=MAPK8
NFKBIA	NFKB Inhibitor Alpha	Protein Coding	49	GC14M035401	1.00323	https://www.genecards.org/cgi-bin/carddisp.pl?gene=NFKBIA
PIK3R2	Phosphoinositide-3-Kinase Regulatory Subunit 2	Protein Coding	49	GC19P018153	1.00323	https://www.genecards.org/cgi-bin/carddisp.pl?gene=PIK3R2
SYK	Spleen Associated Tyrosine Kinase	Protein Coding	49	GC09P091527	1.00323	https://www.genecards.org/cgi-bin/carddisp.pl?gene=SYK
IRAK4	Interleukin 1 Receptor Associated Kinase 4	Protein Coding	48	GC12P043758	1.00323	https://www.genecards.org/cgi-bin/carddisp.pl?gene=IRAK4
PIK3CB	Phosphatidylinositol-4,5-Bisphosphate 3-Kinase Catalytic Subunit Beta	Protein Coding	48	GC03M138652	1.00323	https://www.genecards.org/cgi-bin/carddisp.pl?gene=PIK3CB
IKBKG	Inhibitor Of Nuclear Factor Kappa B Kinase Regulatory Subunit Gamma	Protein Coding	47	GC0XP154541	1.00323	https://www.genecards.org/cgi-bin/carddisp.pl?gene=IKBKG
FGG	Fibrinogen Gamma Chain	Protein Coding	47	GC04M154604	1.00323	https://www.genecards.org/cgi-bin/carddisp.pl?gene=FGG
MAPK12	Mitogen-Activated Protein Kinase 12	Protein Coding	47	GC22M051114	1.00323	https://www.genecards.org/cgi-bin/carddisp.pl?gene=MAPK12
MAPK9	Mitogen-Activated Protein Kinase 9	Protein Coding	47	GC05M180238	1.00323	https://www.genecards.org/cgi-bin/carddisp.pl?gene=MAPK9
PLCG1	Phospholipase C Gamma 1	Protein Coding	47	GC20P041136	1.00323	https://www.genecards.org/cgi-bin/carddisp.pl?gene=PLCG1
RPL11	Ribosomal Protein L11	Protein Coding	47	GC01P023691	1.00323	https://www.genecards.org/cgi-bin/carddisp.pl?gene=RPL11
RPS19	Ribosomal Protein S19	Protein Coding	47	GC19P042768	1.00323	https://www.genecards.org/cgi-bin/carddisp.pl?gene=RPS19
PRKCB	Protein Kinase C Beta	Protein Coding	47	GC16P024020	1.00323	https://www.genecards.org/cgi-bin/carddisp.pl?gene=PRKCB
CYBB	Cytochrome B-245 Beta Chain	Protein Coding	46	GC0XP037780	1.00323	https://www.genecards.org/cgi-bin/carddisp.pl?gene=CYBB
C1QA	Complement C1q A Chain	Protein Coding	46	GC01P022636	1.00323	https://www.genecards.org/cgi-bin/carddisp.pl?gene=C1QA
C1R	Complement C1r	Protein Coding	46	GC12M007353	1.00323	https://www.genecards.org/cgi-bin/carddisp.pl?gene=C1R
C3	Complement C3	Protein Coding	46	GC19M006677	1.00323	https://www.genecards.org/cgi-bin/carddisp.pl?gene=C3
MAPK11	Mitogen-Activated Protein Kinase 11	Protein Coding	46	GC22M050263	1.00323	https://www.genecards.org/cgi-bin/carddisp.pl?gene=MAPK11
MAPK13	Mitogen-Activated Protein Kinase 13	Protein Coding	46	GC06P061308	1.00323	https://www.genecards.org/cgi-bin/carddisp.pl?gene=MAPK13
MASP1	MBL Associated Serine Protease 1	Protein Coding	46	GC03M187216	1.00323	https://www.genecards.org/cgi-bin/carddisp.pl?gene=MASP1
TAB2	TGF-Beta Activated Kinase 1 (MAP3K7) Binding Protein 2	Protein Coding	46	GC06P149218	1.00323	https://www.genecards.org/cgi-bin/carddisp.pl?gene=TAB2
RPL5	Ribosomal Protein L5	Protein Coding	46	GC01P092832	1.00323	https://www.genecards.org/cgi-bin/carddisp.pl?gene=RPL5
TRAF6	TNF Receptor Associated Factor 6	Protein Coding	46	GC11M036467	1.00323	https://www.genecards.org/cgi-bin/carddisp.pl?gene=TRAF6
C1S	Complement C1s	Protein Coding	45	GC12P014228	1.00323	https://www.genecards.org/cgi-bin/carddisp.pl?gene=C1S
C2	Complement C2	Protein Coding	45	GC06P031897	1.00323	https://www.genecards.org/cgi-bin/carddisp.pl?gene=C2
F13A1	Coagulation Factor XIII A Chain	Protein Coding	45	GC06M006144	1.00323	https://www.genecards.org/cgi-bin/carddisp.pl?gene=F13A1
FCGR2A	Fc Fragment Of IgG Receptor IIa	Protein Coding	45	GC01P161505	1.00323	https://www.genecards.org/cgi-bin/carddisp.pl?gene=FCGR2A
MASP2	MBL Associated Serine Protease 2	Protein Coding	45	GC01M011026	1.00323	https://www.genecards.org/cgi-bin/carddisp.pl?gene=MASP2
ADAR	Adenosine Deaminase RNA Specific	Protein Coding	44	GC01M154582	1.00323	https://www.genecards.org/cgi-bin/carddisp.pl?gene=ADAR
C1QB	Complement C1q B Chain	Protein Coding	44	GC01P022652	1.00323	https://www.genecards.org/cgi-bin/carddisp.pl?gene=C1QB
C1QC	Complement C1q C Chain	Protein Coding	44	GC01P022643	1.00323	https://www.genecards.org/cgi-bin/carddisp.pl?gene=C1QC
C3AR1	Complement C3a Receptor 1	Protein Coding	44	GC12M008058	1.00323	https://www.genecards.org/cgi-bin/carddisp.pl?gene=C3AR1
CFB	Complement Factor B	Protein Coding	44	GC06P031945	1.00323	https://www.genecards.org/cgi-bin/carddisp.pl?gene=CFB
RPL10	Ribosomal Protein L10	Protein Coding	44	GC0XP154389	1.00323	https://www.genecards.org/cgi-bin/carddisp.pl?gene=RPL10
RPL35	Ribosomal Protein L35	Protein Coding	44	GC09M124857	1.00323	https://www.genecards.org/cgi-bin/carddisp.pl?gene=RPL35
RPL18	Ribosomal Protein L18	Protein Coding	44	GC19M048615	1.00323	https://www.genecards.org/cgi-bin/carddisp.pl?gene=RPL18
RPSA	Ribosomal Protein SA	Protein Coding	44	GC03P039406	1.00323	https://www.genecards.org/cgi-bin/carddisp.pl?gene=RPSA
RPS10	Ribosomal Protein S10	Protein Coding	44	GC06M051545	1.00323	https://www.genecards.org/cgi-bin/carddisp.pl?gene=RPS10
C9	Complement C9	Protein Coding	43	GC05M039320	1.00323	https://www.genecards.org/cgi-bin/carddisp.pl?gene=C9
C4A	Complement C4A (Rodgers Blood Group)	Protein Coding	43	GC06P061193	1.00323	https://www.genecards.org/cgi-bin/carddisp.pl?gene=C4A
PIK3R3	Phosphoinositide-3-Kinase Regulatory Subunit 3	Protein Coding	43	GC01M046041	1.00323	https://www.genecards.org/cgi-bin/carddisp.pl?gene=PIK3R3
RPS14	Ribosomal Protein S14	Protein Coding	43	GC05M150443	1.00323	https://www.genecards.org/cgi-bin/carddisp.pl?gene=RPS14
RPS20	Ribosomal Protein S20	Protein Coding	43	GC08M056067	1.00323	https://www.genecards.org/cgi-bin/carddisp.pl?gene=RPS20
RPS3	Ribosomal Protein S3	Protein Coding	43	GC11P076606	1.00323	https://www.genecards.org/cgi-bin/carddisp.pl?gene=RPS3
RPS6	Ribosomal Protein S6	Protein Coding	43	GC09M019375	1.00323	https://www.genecards.org/cgi-bin/carddisp.pl?gene=RPS6
RPL15	Ribosomal Protein L15	Protein Coding	43	GC03P023916	1.00323	https://www.genecards.org/cgi-bin/carddisp.pl?gene=RPL15
RPL21	Ribosomal Protein L21	Protein Coding	43	GC13P027251	1.00323	https://www.genecards.org/cgi-bin/carddisp.pl?gene=RPL21
C6	Complement C6	Protein Coding	42	GC05M041142	1.00323	https://www.genecards.org/cgi-bin/carddisp.pl?gene=C6
C4B	Complement C4B (Chido Blood Group)	Protein Coding	42	GC06P032014	1.00323	https://www.genecards.org/cgi-bin/carddisp.pl?gene=C4B
C8B	Complement C8 Beta Chain	Protein Coding	42	GC01M056929	1.00323	https://www.genecards.org/cgi-bin/carddisp.pl?gene=C8B
C7	Complement C7	Protein Coding	42	GC05P040909	1.00323	https://www.genecards.org/cgi-bin/carddisp.pl?gene=C7
IL12A	Interleukin 12A	Protein Coding	42	GC03P159988	1.00323	https://www.genecards.org/cgi-bin/carddisp.pl?gene=IL12A
IL12B	Interleukin 12B	Protein Coding	42	GC05M159314	1.00323	https://www.genecards.org/cgi-bin/carddisp.pl?gene=IL12B
HBEGF	Heparin Binding EGF Like Growth Factor	Protein Coding	42	GC05M140332	1.00323	https://www.genecards.org/cgi-bin/carddisp.pl?gene=HBEGF
RPL22	Ribosomal Protein L22	Protein Coding	42	GC01M006179	1.00323	https://www.genecards.org/cgi-bin/carddisp.pl?gene=RPL22
RPS15A	Ribosomal Protein S15a	Protein Coding	42	GC16M018781	1.00323	https://www.genecards.org/cgi-bin/carddisp.pl?gene=RPS15A
RPS27	Ribosomal Protein S27	Protein Coding	42	GC01P153991	1.00323	https://www.genecards.org/cgi-bin/carddisp.pl?gene=RPS27
RPL27	Ribosomal Protein L27	Protein Coding	42	GC17P042998	1.00323	https://www.genecards.org/cgi-bin/carddisp.pl?gene=RPL27
RPS17	Ribosomal Protein S17	Protein Coding	42	GC15M082536	1.00323	https://www.genecards.org/cgi-bin/carddisp.pl?gene=RPS17
RPS27A	Ribosomal Protein S27a	Protein Coding	42	GC02P055231	1.00323	https://www.genecards.org/cgi-bin/carddisp.pl?gene=RPS27A
RPL10A	Ribosomal Protein L10a	Protein Coding	42	GC06P061295	1.00323	https://www.genecards.org/cgi-bin/carddisp.pl?gene=RPL10A
RPL13A	Ribosomal Protein L13a	Protein Coding	42	GC19P049487	1.00323	https://www.genecards.org/cgi-bin/carddisp.pl?gene=RPL13A
RPL35A	Ribosomal Protein L35a	Protein Coding	42	GC03P197949	1.00323	https://www.genecards.org/cgi-bin/carddisp.pl?gene=RPL35A
RPS2	Ribosomal Protein S2	Protein Coding	42	GC16M004121	1.00323	https://www.genecards.org/cgi-bin/carddisp.pl?gene=RPS2
RPS24	Ribosomal Protein S24	Protein Coding	42	GC10P078033	1.00323	https://www.genecards.org/cgi-bin/carddisp.pl?gene=RPS24
C8A	Complement C8 Alpha Chain	Protein Coding	41	GC01P056854	1.00323	https://www.genecards.org/cgi-bin/carddisp.pl?gene=C8A
NFKBIB	NFKB Inhibitor Beta	Protein Coding	41	GC19P038899	1.00323	https://www.genecards.org/cgi-bin/carddisp.pl?gene=NFKBIB
RPL19	Ribosomal Protein L19	Protein Coding	41	GC17P039200	1.00323	https://www.genecards.org/cgi-bin/carddisp.pl?gene=RPL19
RPL31	Ribosomal Protein L31	Protein Coding	41	GC02P100985	1.00323	https://www.genecards.org/cgi-bin/carddisp.pl?gene=RPL31
RPL7A	Ribosomal Protein L7a	Protein Coding	41	GC09P133348	1.00323	https://www.genecards.org/cgi-bin/carddisp.pl?gene=RPL7A
RPS3A	Ribosomal Protein S3A	Protein Coding	41	GC04P151099	1.00323	https://www.genecards.org/cgi-bin/carddisp.pl?gene=RPS3A
RPS5	Ribosomal Protein S5	Protein Coding	41	GC19P058386	1.00323	https://www.genecards.org/cgi-bin/carddisp.pl?gene=RPS5
RPL23A	Ribosomal Protein L23a	Protein Coding	41	GC17P028719	1.00323	https://www.genecards.org/cgi-bin/carddisp.pl?gene=RPL23A
RPL26	Ribosomal Protein L26	Protein Coding	41	GC17M008377	1.00323	https://www.genecards.org/cgi-bin/carddisp.pl?gene=RPL26
RPL7	Ribosomal Protein L7	Protein Coding	41	GC08M073290	1.00323	https://www.genecards.org/cgi-bin/carddisp.pl?gene=RPL7
RPL12	Ribosomal Protein L12	Protein Coding	41	GC09M127447	1.00323	https://www.genecards.org/cgi-bin/carddisp.pl?gene=RPL12
RPL13	Ribosomal Protein L13	Protein Coding	41	GC16P090056	1.00323	https://www.genecards.org/cgi-bin/carddisp.pl?gene=RPL13
RPL4	Ribosomal Protein L4	Protein Coding	41	GC15M066498	1.00323	https://www.genecards.org/cgi-bin/carddisp.pl?gene=RPL4
RPS12	Ribosomal Protein S12	Protein Coding	41	GC06P132814	1.00323	https://www.genecards.org/cgi-bin/carddisp.pl?gene=RPS12
RPS13	Ribosomal Protein S13	Protein Coding	41	GC11M017338	1.00323	https://www.genecards.org/cgi-bin/carddisp.pl?gene=RPS13
RPS26	Ribosomal Protein S26	Protein Coding	41	GC12P056043	1.00323	https://www.genecards.org/cgi-bin/carddisp.pl?gene=RPS26
RPS29	Ribosomal Protein S29	Protein Coding	41	GC14M049570	1.00323	https://www.genecards.org/cgi-bin/carddisp.pl?gene=RPS29
RPS7	Ribosomal Protein S7	Protein Coding	41	GC02P003575	1.00323	https://www.genecards.org/cgi-bin/carddisp.pl?gene=RPS7
RPS9	Ribosomal Protein S9	Protein Coding	41	GC19P059791	1.00323	https://www.genecards.org/cgi-bin/carddisp.pl?gene=RPS9
RPL3	Ribosomal Protein L3	Protein Coding	41	GC22M050950	1.00323	https://www.genecards.org/cgi-bin/carddisp.pl?gene=RPL3
RPL9	Ribosomal Protein L9	Protein Coding	41	GC04M039452	1.00323	https://www.genecards.org/cgi-bin/carddisp.pl?gene=RPL9
C8G	Complement C8 Gamma Chain	Protein Coding	40	GC09P136944	1.00323	https://www.genecards.org/cgi-bin/carddisp.pl?gene=C8G
F13B	Coagulation Factor XIII B Chain	Protein Coding	40	GC01M197008	1.00323	https://www.genecards.org/cgi-bin/carddisp.pl?gene=F13B
RPL27A	Ribosomal Protein L27a	Protein Coding	40	GC11P008682	1.00323	https://www.genecards.org/cgi-bin/carddisp.pl?gene=RPL27A
RPL8	Ribosomal Protein L8	Protein Coding	40	GC08M145002	1.00323	https://www.genecards.org/cgi-bin/carddisp.pl?gene=RPL8
RPLP1	Ribosomal Protein Lateral Stalk Subunit P1	Protein Coding	40	GC15P080621	1.00323	https://www.genecards.org/cgi-bin/carddisp.pl?gene=RPLP1
RPLP2	Ribosomal Protein Lateral Stalk Subunit P2	Protein Coding	40	GC11P001179	1.00323	https://www.genecards.org/cgi-bin/carddisp.pl?gene=RPLP2
UBA52	Ubiquitin A-52 Residue Ribosomal Protein Fusion Product 1	Protein Coding	40	GC19P018563	1.00323	https://www.genecards.org/cgi-bin/carddisp.pl?gene=UBA52
RPS15	Ribosomal Protein S15	Protein Coding	40	GC19P001438	1.00323	https://www.genecards.org/cgi-bin/carddisp.pl?gene=RPS15
RPS16	Ribosomal Protein S16	Protein Coding	40	GC19M039433	1.00323	https://www.genecards.org/cgi-bin/carddisp.pl?gene=RPS16
RPLP0	Ribosomal Protein Lateral Stalk Subunit P0	Protein Coding	40	GC12M120196	1.00323	https://www.genecards.org/cgi-bin/carddisp.pl?gene=RPLP0
RPS23	Ribosomal Protein S23	Protein Coding	40	GC05M082273	1.00323	https://www.genecards.org/cgi-bin/carddisp.pl?gene=RPS23
FAU	FAU Ubiquitin Like And Ribosomal Protein S30 Fusion	Protein Coding	39	GC11M065120	1.00323	https://www.genecards.org/cgi-bin/carddisp.pl?gene=FAU
OAS2	2'-5'-Oligoadenylate Synthetase 2	Protein Coding	39	GC12P112978	1.00323	https://www.genecards.org/cgi-bin/carddisp.pl?gene=OAS2
RPS11	Ribosomal Protein S11	Protein Coding	39	GC19P049496	1.00323	https://www.genecards.org/cgi-bin/carddisp.pl?gene=RPS11
RPL30	Ribosomal Protein L30	Protein Coding	39	GC08M098024	1.00323	https://www.genecards.org/cgi-bin/carddisp.pl?gene=RPL30
RPL23	Ribosomal Protein L23	Protein Coding	39	GC17M038847	1.00323	https://www.genecards.org/cgi-bin/carddisp.pl?gene=RPL23
RPL28	Ribosomal Protein L28	Protein Coding	39	GC19P057758	1.00323	https://www.genecards.org/cgi-bin/carddisp.pl?gene=RPL28
RPL6	Ribosomal Protein L6	Protein Coding	39	GC12M112320	1.00323	https://www.genecards.org/cgi-bin/carddisp.pl?gene=RPL6
RPL24	Ribosomal Protein L24	Protein Coding	39	GC03M101681	1.00323	https://www.genecards.org/cgi-bin/carddisp.pl?gene=RPL24
RPS18	Ribosomal Protein S18	Protein Coding	39	GC06P061228	1.00323	https://www.genecards.org/cgi-bin/carddisp.pl?gene=RPS18
RPS28	Ribosomal Protein S28	Protein Coding	38	GC19P008339	1.00323	https://www.genecards.org/cgi-bin/carddisp.pl?gene=RPS28
RPS8	Ribosomal Protein S8	Protein Coding	38	GC01P044775	1.00323	https://www.genecards.org/cgi-bin/carddisp.pl?gene=RPS8
RPL18A	Ribosomal Protein L18a	Protein Coding	38	GC19P029026	1.00323	https://www.genecards.org/cgi-bin/carddisp.pl?gene=RPL18A
RPL34	Ribosomal Protein L34	Protein Coding	38	GC04P108620	1.00323	https://www.genecards.org/cgi-bin/carddisp.pl?gene=RPL34
RPS4X	Ribosomal Protein S4 X-Linked	Protein Coding	38	GC0XM072255	1.00323	https://www.genecards.org/cgi-bin/carddisp.pl?gene=RPS4X
RPL14	Ribosomal Protein L14	Protein Coding	38	GC03P040458	1.00323	https://www.genecards.org/cgi-bin/carddisp.pl?gene=RPL14
RPL3L	Ribosomal Protein L3 Like	Protein Coding	38	GC16M001943	1.00323	https://www.genecards.org/cgi-bin/carddisp.pl?gene=RPL3L
RPS21	Ribosomal Protein S21	Protein Coding	38	GC20P062387	1.00323	https://www.genecards.org/cgi-bin/carddisp.pl?gene=RPS21
RPL29	Ribosomal Protein L29	Protein Coding	38	GC03M052016	1.00323	https://www.genecards.org/cgi-bin/carddisp.pl?gene=RPL29
RPL32	Ribosomal Protein L32	Protein Coding	38	GC03M012834	1.00323	https://www.genecards.org/cgi-bin/carddisp.pl?gene=RPL32
RPL37	Ribosomal Protein L37	Protein Coding	38	GC05M040825	1.00323	https://www.genecards.org/cgi-bin/carddisp.pl?gene=RPL37
IFNA5	Interferon Alpha 5	Protein Coding	37	GC09M021304	1.00323	https://www.genecards.org/cgi-bin/carddisp.pl?gene=IFNA5
MX2	MX Dynamin Like GTPase 2	Protein Coding	37	GC21P041361	1.00323	https://www.genecards.org/cgi-bin/carddisp.pl?gene=MX2
RPL17	Ribosomal Protein L17	Protein Coding	37	GC18M049488	1.00323	https://www.genecards.org/cgi-bin/carddisp.pl?gene=RPL17
RPL36AL	Ribosomal Protein L36a Like	Protein Coding	37	GC14M049619	1.00323	https://www.genecards.org/cgi-bin/carddisp.pl?gene=RPL36AL
RPS25	Ribosomal Protein S25	Protein Coding	37	GC11M119015	1.00323	https://www.genecards.org/cgi-bin/carddisp.pl?gene=RPS25
RPL38	Ribosomal Protein L38	Protein Coding	37	GC17P074204	1.00323	https://www.genecards.org/cgi-bin/carddisp.pl?gene=RPL38
RPL37A	Ribosomal Protein L37a	Protein Coding	37	GC02P216498	1.00323	https://www.genecards.org/cgi-bin/carddisp.pl?gene=RPL37A
RPS27L	Ribosomal Protein S27 Like	Protein Coding	37	GC15M070510	1.00323	https://www.genecards.org/cgi-bin/carddisp.pl?gene=RPS27L
IFNA6	Interferon Alpha 6	Protein Coding	36	GC09M021349	1.00323	https://www.genecards.org/cgi-bin/carddisp.pl?gene=IFNA6
IFNA8	Interferon Alpha 8	Protein Coding	36	GC09P021409	1.00323	https://www.genecards.org/cgi-bin/carddisp.pl?gene=IFNA8
IFNA21	Interferon Alpha 21	Protein Coding	36	GC09M021165	1.00323	https://www.genecards.org/cgi-bin/carddisp.pl?gene=IFNA21
RPL22L1	Ribosomal Protein L22 Like 1	Protein Coding	36	GC03M170864	1.00323	https://www.genecards.org/cgi-bin/carddisp.pl?gene=RPL22L1
IFNA10	Interferon Alpha 10	Protein Coding	35	GC09M021562	1.00323	https://www.genecards.org/cgi-bin/carddisp.pl?gene=IFNA10
RPL36A	Ribosomal Protein L36a	Protein Coding	35	GC0XP101392	1.00323	https://www.genecards.org/cgi-bin/carddisp.pl?gene=RPL36A
RPL26L1	Ribosomal Protein L26 Like 1	Protein Coding	35	GC05P172958	1.00323	https://www.genecards.org/cgi-bin/carddisp.pl?gene=RPL26L1
IFNA13	Interferon Alpha 13	Protein Coding	34	GC09M021367	1.00323	https://www.genecards.org/cgi-bin/carddisp.pl?gene=IFNA13
IFNA17	Interferon Alpha 17	Protein Coding	34	GC09M021227	1.00323	https://www.genecards.org/cgi-bin/carddisp.pl?gene=IFNA17
RPL10L	Ribosomal Protein L10 Like	Protein Coding	34	GC14M046651	1.00323	https://www.genecards.org/cgi-bin/carddisp.pl?gene=RPL10L
IFNA4	Interferon Alpha 4	Protein Coding	33	GC09M021186	1.00323	https://www.genecards.org/cgi-bin/carddisp.pl?gene=IFNA4
IFNA7	Interferon Alpha 7	Protein Coding	33	GC09M021561	1.00323	https://www.genecards.org/cgi-bin/carddisp.pl?gene=IFNA7
RPS4Y1	Ribosomal Protein S4 Y-Linked 1	Protein Coding	33	GC0YP002841	1.00323	https://www.genecards.org/cgi-bin/carddisp.pl?gene=RPS4Y1
IFNA14	Interferon Alpha 14	Protein Coding	32	GC09M021239	1.00323	https://www.genecards.org/cgi-bin/carddisp.pl?gene=IFNA14
IFNA16	Interferon Alpha 16	Protein Coding	32	GC09M021216	1.00323	https://www.genecards.org/cgi-bin/carddisp.pl?gene=IFNA16
RPS4Y2	Ribosomal Protein S4 Y-Linked 2	Protein Coding	32	GC0YP020756	1.00323	https://www.genecards.org/cgi-bin/carddisp.pl?gene=RPS4Y2
RPL41	Ribosomal Protein L41	Protein Coding	28	GC12P056695	1.00323	https://www.genecards.org/cgi-bin/carddisp.pl?gene=RPL41
RPS10-NUDT3	RPS10-NUDT3 Readthrough	Protein Coding	22	GC06M053756	1.00323	https://www.genecards.org/cgi-bin/carddisp.pl?gene=RPS10-NUDT3
RPL17-C18orf32	RPL17-C18orf32 Readthrough	Protein Coding	20	GC18M049481	1.00323	https://www.genecards.org/cgi-bin/carddisp.pl?gene=RPL17-C18orf32
RPL36A-HNRNPH2	RPL36A-HNRNPH2 Readthrough	Protein Coding	18	GC0XP101390	1.00323	https://www.genecards.org/cgi-bin/carddisp.pl?gene=RPL36A-HNRNPH2
LOC102723407	Immunoglobulin Heavy Variable 4-38-2-Like	Protein Coding	7	GC14P8B0041	1.00323	https://www.genecards.org/cgi-bin/carddisp.pl?gene=LOC102723407
STUB1	STIP1 Homology And U-Box Containing Protein 1	Protein Coding	44	GC16P006737	0.985385	https://www.genecards.org/cgi-bin/carddisp.pl?gene=STUB1
FXR1	FMR1 Autosomal Homolog 1	Protein Coding	42	GC03P180868	0.985385	https://www.genecards.org/cgi-bin/carddisp.pl?gene=FXR1
FANCI	FA Complementation Group I	Protein Coding	41	GC15P089243	0.985385	https://www.genecards.org/cgi-bin/carddisp.pl?gene=FANCI
TMEM43	Transmembrane Protein 43	Protein Coding	40	GC03P014124	0.985385	https://www.genecards.org/cgi-bin/carddisp.pl?gene=TMEM43
PSMC4	Proteasome 26S Subunit, ATPase 4	Protein Coding	40	GC19P042602	0.985385	https://www.genecards.org/cgi-bin/carddisp.pl?gene=PSMC4
IPO11	Importin 11	Protein Coding	37	GC05P062403	0.985385	https://www.genecards.org/cgi-bin/carddisp.pl?gene=IPO11
LMAN2L	Lectin, Mannose Binding 2 Like	Protein Coding	37	GC02M096794	0.985385	https://www.genecards.org/cgi-bin/carddisp.pl?gene=LMAN2L
SUMF2	Sulfatase Modifying Factor 2	Protein Coding	37	GC07P056278	0.985385	https://www.genecards.org/cgi-bin/carddisp.pl?gene=SUMF2
CUL2	Cullin 2	Protein Coding	42	GC10M035046	0.981026	https://www.genecards.org/cgi-bin/carddisp.pl?gene=CUL2
RBX1	Ring-Box 1	Protein Coding	42	GC22P040951	0.981026	https://www.genecards.org/cgi-bin/carddisp.pl?gene=RBX1
ZYG11B	Zyg-11 Family Member B, Cell Cycle Regulator	Protein Coding	33	GC01P052726	0.981026	https://www.genecards.org/cgi-bin/carddisp.pl?gene=ZYG11B
PHB	Prohibitin	Protein Coding	46	GC17M049404	0.958445	https://www.genecards.org/cgi-bin/carddisp.pl?gene=PHB
SURF4	Surfeit 4	Protein Coding	38	GC09M133361	0.958445	https://www.genecards.org/cgi-bin/carddisp.pl?gene=SURF4
CTSB	Cathepsin B	Protein Coding	50	GC08M011842	0.943959	https://www.genecards.org/cgi-bin/carddisp.pl?gene=CTSB
TM9SF2	Transmembrane 9 Superfamily Member 2	Protein Coding	37	GC13P099446	0.943959	https://www.genecards.org/cgi-bin/carddisp.pl?gene=TM9SF2
GOT1	Glutamic-Oxaloacetic Transaminase 1	Protein Coding	45	GC10M099396	0.929825	https://www.genecards.org/cgi-bin/carddisp.pl?gene=GOT1
SERPINE1	Serpin Family E Member 1	Protein Coding	49	GC07P101127	0.898945	https://www.genecards.org/cgi-bin/carddisp.pl?gene=SERPINE1
CXCR4	C-X-C Motif Chemokine Receptor 4	Protein Coding	51	GC02M136114	0.891054	https://www.genecards.org/cgi-bin/carddisp.pl?gene=CXCR4
ALPL	Alkaline Phosphatase, Biomineralization Associated	Protein Coding	49	GC01P021508	0.891054	https://www.genecards.org/cgi-bin/carddisp.pl?gene=ALPL
ADRB2	Adrenoceptor Beta 2	Protein Coding	49	GC05P148825	0.891054	https://www.genecards.org/cgi-bin/carddisp.pl?gene=ADRB2
ICAM1	Intercellular Adhesion Molecule 1	Protein Coding	49	GC19P010270	0.891054	https://www.genecards.org/cgi-bin/carddisp.pl?gene=ICAM1
MAPT	Microtubule Associated Protein Tau	Protein Coding	49	GC17P045894	0.891054	https://www.genecards.org/cgi-bin/carddisp.pl?gene=MAPT
ABCA3	ATP Binding Cassette Subfamily A Member 3	Protein Coding	48	GC16M002275	0.891054	https://www.genecards.org/cgi-bin/carddisp.pl?gene=ABCA3
ALOX5	Arachidonate 5-Lipoxygenase	Protein Coding	48	GC10P045374	0.891054	https://www.genecards.org/cgi-bin/carddisp.pl?gene=ALOX5
CPT2	Carnitine Palmitoyltransferase 2	Protein Coding	48	GC01P053196	0.891054	https://www.genecards.org/cgi-bin/carddisp.pl?gene=CPT2
CXCR2	C-X-C Motif Chemokine Receptor 2	Protein Coding	48	GC02P218125	0.891054	https://www.genecards.org/cgi-bin/carddisp.pl?gene=CXCR2
GATA4	GATA Binding Protein 4	Protein Coding	48	GC08P011676	0.891054	https://www.genecards.org/cgi-bin/carddisp.pl?gene=GATA4
PDE4D	Phosphodiesterase 4D	Protein Coding	48	GC05M058969	0.891054	https://www.genecards.org/cgi-bin/carddisp.pl?gene=PDE4D
TF	Transferrin	Protein Coding	48	GC03P133666	0.891054	https://www.genecards.org/cgi-bin/carddisp.pl?gene=TF
MMP8	Matrix Metallopeptidase 8	Protein Coding	47	GC11M102617	0.891054	https://www.genecards.org/cgi-bin/carddisp.pl?gene=MMP8
IL1RN	Interleukin 1 Receptor Antagonist	Protein Coding	47	GC02P118067	0.891054	https://www.genecards.org/cgi-bin/carddisp.pl?gene=IL1RN
ACTA1	Actin Alpha 1, Skeletal Muscle	Protein Coding	46	GC01M229431	0.891054	https://www.genecards.org/cgi-bin/carddisp.pl?gene=ACTA1
IRF1	Interferon Regulatory Factor 1	Protein Coding	46	GC05M132440	0.891054	https://www.genecards.org/cgi-bin/carddisp.pl?gene=IRF1
DMD	Dystrophin	Protein Coding	46	GC0XM031097	0.891054	https://www.genecards.org/cgi-bin/carddisp.pl?gene=DMD
GAA	Alpha Glucosidase	Protein Coding	46	GC17P080101	0.891054	https://www.genecards.org/cgi-bin/carddisp.pl?gene=GAA
MUSK	Muscle Associated Receptor Tyrosine Kinase	Protein Coding	46	GC09P110668	0.891054	https://www.genecards.org/cgi-bin/carddisp.pl?gene=MUSK
MYH7	Myosin Heavy Chain 7	Protein Coding	46	GC14M023412	0.891054	https://www.genecards.org/cgi-bin/carddisp.pl?gene=MYH7
SLC4A1	Solute Carrier Family 4 Member 1 (Diego Blood Group)	Protein Coding	46	GC17M044503	0.891054	https://www.genecards.org/cgi-bin/carddisp.pl?gene=SLC4A1
TLR5	Toll Like Receptor 5	Protein Coding	46	GC01M223275	0.891054	https://www.genecards.org/cgi-bin/carddisp.pl?gene=TLR5
TLR1	Toll Like Receptor 1	Protein Coding	46	GC04M038793	0.891054	https://www.genecards.org/cgi-bin/carddisp.pl?gene=TLR1
TTN	Titin	Protein Coding	46	GC02M178525	0.891054	https://www.genecards.org/cgi-bin/carddisp.pl?gene=TTN
RYR1	Ryanodine Receptor 1	Protein Coding	46	GC19P042548	0.891054	https://www.genecards.org/cgi-bin/carddisp.pl?gene=RYR1
ACADVL	Acyl-CoA Dehydrogenase Very Long Chain	Protein Coding	45	GC17P007219	0.891054	https://www.genecards.org/cgi-bin/carddisp.pl?gene=ACADVL
ACHE	Acetylcholinesterase (Cartwright Blood Group)	Protein Coding	45	GC07M100889	0.891054	https://www.genecards.org/cgi-bin/carddisp.pl?gene=ACHE
CD28	CD28 Molecule	Protein Coding	45	GC02P203706	0.891054	https://www.genecards.org/cgi-bin/carddisp.pl?gene=CD28
FHL1	Four And A Half LIM Domains 1	Protein Coding	45	GC0XP136146	0.891054	https://www.genecards.org/cgi-bin/carddisp.pl?gene=FHL1
IL7R	Interleukin 7 Receptor	Protein Coding	45	GC05P035852	0.891054	https://www.genecards.org/cgi-bin/carddisp.pl?gene=IL7R
CD46	CD46 Molecule	Protein Coding	45	GC01P207752	0.891054	https://www.genecards.org/cgi-bin/carddisp.pl?gene=CD46
EIF4G1	Eukaryotic Translation Initiation Factor 4 Gamma 1	Protein Coding	45	GC03P184314	0.891054	https://www.genecards.org/cgi-bin/carddisp.pl?gene=EIF4G1
GZMB	Granzyme B	Protein Coding	45	GC14M024630	0.891054	https://www.genecards.org/cgi-bin/carddisp.pl?gene=GZMB
HADHA	Hydroxyacyl-CoA Dehydrogenase Trifunctional Multienzyme Complex Subunit Alpha	Protein Coding	45	GC02M026190	0.891054	https://www.genecards.org/cgi-bin/carddisp.pl?gene=HADHA
NPPA	Natriuretic Peptide A	Protein Coding	45	GC01M011846	0.891054	https://www.genecards.org/cgi-bin/carddisp.pl?gene=NPPA
PPARA	Peroxisome Proliferator Activated Receptor Alpha	Protein Coding	45	GC22P046150	0.891054	https://www.genecards.org/cgi-bin/carddisp.pl?gene=PPARA
NKX2-1	NK2 Homeobox 1	Protein Coding	45	GC14M036516	0.891054	https://www.genecards.org/cgi-bin/carddisp.pl?gene=NKX2-1
PTGS1	Prostaglandin-Endoperoxide Synthase 1	Protein Coding	45	GC09P122370	0.891054	https://www.genecards.org/cgi-bin/carddisp.pl?gene=PTGS1
TNFRSF13B	TNF Receptor Superfamily Member 13B	Protein Coding	45	GC17M016929	0.891054	https://www.genecards.org/cgi-bin/carddisp.pl?gene=TNFRSF13B
TNFSF10	TNF Superfamily Member 10	Protein Coding	45	GC03M172505	0.891054	https://www.genecards.org/cgi-bin/carddisp.pl?gene=TNFSF10
RNASEL	Ribonuclease L	Protein Coding	45	GC01M182542	0.891054	https://www.genecards.org/cgi-bin/carddisp.pl?gene=RNASEL
CSF2RA	Colony Stimulating Factor 2 Receptor Subunit Alpha	Protein Coding	44	GC0XP001399	0.891054	https://www.genecards.org/cgi-bin/carddisp.pl?gene=CSF2RA
APEX1	Apurinic/Apyrimidinic Endodeoxyribonuclease 1	Protein Coding	44	GC14P020455	0.891054	https://www.genecards.org/cgi-bin/carddisp.pl?gene=APEX1
IL1R1	Interleukin 1 Receptor Type 1	Protein Coding	44	GC02P102136	0.891054	https://www.genecards.org/cgi-bin/carddisp.pl?gene=IL1R1
CXCR3	C-X-C Motif Chemokine Receptor 3	Protein Coding	44	GC0XM071615	0.891054	https://www.genecards.org/cgi-bin/carddisp.pl?gene=CXCR3
EIF2S1	Eukaryotic Translation Initiation Factor 2 Subunit Alpha	Protein Coding	44	GC14P067359	0.891054	https://www.genecards.org/cgi-bin/carddisp.pl?gene=EIF2S1
PDE4B	Phosphodiesterase 4B	Protein Coding	44	GC01P065792	0.891054	https://www.genecards.org/cgi-bin/carddisp.pl?gene=PDE4B
MECP2	Methyl-CpG Binding Protein 2	Protein Coding	44	GC0XM154021	0.891054	https://www.genecards.org/cgi-bin/carddisp.pl?gene=MECP2
TLR9	Toll Like Receptor 9	Protein Coding	44	GC03M052222	0.891054	https://www.genecards.org/cgi-bin/carddisp.pl?gene=TLR9
PDE4A	Phosphodiesterase 4A	Protein Coding	44	GC19P010416	0.891054	https://www.genecards.org/cgi-bin/carddisp.pl?gene=PDE4A
TIMP1	TIMP Metallopeptidase Inhibitor 1	Protein Coding	43	GC0XP047583	0.891054	https://www.genecards.org/cgi-bin/carddisp.pl?gene=TIMP1
RBP4	Retinol Binding Protein 4	Protein Coding	43	GC10M093591	0.891054	https://www.genecards.org/cgi-bin/carddisp.pl?gene=RBP4
THBD	Thrombomodulin	Protein Coding	43	GC20M023026	0.891054	https://www.genecards.org/cgi-bin/carddisp.pl?gene=THBD
CXADR	CXADR Ig-Like Cell Adhesion Molecule	Protein Coding	42	GC21P017513	0.891054	https://www.genecards.org/cgi-bin/carddisp.pl?gene=CXADR
IRF2	Interferon Regulatory Factor 2	Protein Coding	42	GC04M184387	0.891054	https://www.genecards.org/cgi-bin/carddisp.pl?gene=IRF2
CD9	CD9 Molecule	Protein Coding	42	GC12P014156	0.891054	https://www.genecards.org/cgi-bin/carddisp.pl?gene=CD9
EPX	Eosinophil Peroxidase	Protein Coding	42	GC17P058192	0.891054	https://www.genecards.org/cgi-bin/carddisp.pl?gene=EPX
LAMA2	Laminin Subunit Alpha 2	Protein Coding	42	GC06P128863	0.891054	https://www.genecards.org/cgi-bin/carddisp.pl?gene=LAMA2
LBP	Lipopolysaccharide Binding Protein	Protein Coding	42	GC20P038346	0.891054	https://www.genecards.org/cgi-bin/carddisp.pl?gene=LBP
MATR3	Matrin 3	Protein Coding	42	GC05P139274	0.891054	https://www.genecards.org/cgi-bin/carddisp.pl?gene=MATR3
PPBP	Pro-Platelet Basic Protein	Protein Coding	42	GC04M073986	0.891054	https://www.genecards.org/cgi-bin/carddisp.pl?gene=PPBP
SURF1	SURF1 Cytochrome C Oxidase Assembly Factor	Protein Coding	42	GC09M133351	0.891054	https://www.genecards.org/cgi-bin/carddisp.pl?gene=SURF1
TAC1	Tachykinin Precursor 1	Protein Coding	42	GC07P097731	0.891054	https://www.genecards.org/cgi-bin/carddisp.pl?gene=TAC1
SDC1	Syndecan 1	Protein Coding	42	GC02M020200	0.891054	https://www.genecards.org/cgi-bin/carddisp.pl?gene=SDC1
SERPINA3	Serpin Family A Member 3	Protein Coding	42	GC14P094612	0.891054	https://www.genecards.org/cgi-bin/carddisp.pl?gene=SERPINA3
DHPS	Deoxyhypusine Synthase	Protein Coding	41	GC19M013225	0.891054	https://www.genecards.org/cgi-bin/carddisp.pl?gene=DHPS
ITIH4	Inter-Alpha-Trypsin Inhibitor Heavy Chain 4	Protein Coding	41	GC03M052812	0.891054	https://www.genecards.org/cgi-bin/carddisp.pl?gene=ITIH4
LTA	Lymphotoxin Alpha	Protein Coding	41	GC06P061168	0.891054	https://www.genecards.org/cgi-bin/carddisp.pl?gene=LTA
MUC5B	Mucin 5B, Oligomeric Mucus/Gel-Forming	Protein Coding	41	GC11P001244	0.891054	https://www.genecards.org/cgi-bin/carddisp.pl?gene=MUC5B
MYL1	Myosin Light Chain 1	Protein Coding	41	GC02M210290	0.891054	https://www.genecards.org/cgi-bin/carddisp.pl?gene=MYL1
MEGF10	Multiple EGF Like Domains 10	Protein Coding	41	GC05P127230	0.891054	https://www.genecards.org/cgi-bin/carddisp.pl?gene=MEGF10
NFU1	NFU1 Iron-Sulfur Cluster Scaffold	Protein Coding	41	GC02M069395	0.891054	https://www.genecards.org/cgi-bin/carddisp.pl?gene=NFU1
TRIM5	Tripartite Motif Containing 5	Protein Coding	41	GC11M005850	0.891054	https://www.genecards.org/cgi-bin/carddisp.pl?gene=TRIM5
SP100	SP100 Nuclear Antigen	Protein Coding	41	GC02P230415	0.891054	https://www.genecards.org/cgi-bin/carddisp.pl?gene=SP100
BPI	Bactericidal Permeability Increasing Protein	Protein Coding	40	GC20P038304	0.891054	https://www.genecards.org/cgi-bin/carddisp.pl?gene=BPI
ATOH7	Atonal BHLH Transcription Factor 7	Protein Coding	40	GC10M068230	0.891054	https://www.genecards.org/cgi-bin/carddisp.pl?gene=ATOH7
IL15	Interleukin 15	Protein Coding	40	GC04P141636	0.891054	https://www.genecards.org/cgi-bin/carddisp.pl?gene=IL15
GLE1	GLE1 RNA Export Mediator	Protein Coding	40	GC09P128504	0.891054	https://www.genecards.org/cgi-bin/carddisp.pl?gene=GLE1
KIR3DL1	Killer Cell Immunoglobulin Like Receptor, Three Ig Domains And Long Cytoplasmic Tail 1	Protein Coding	40	GC19P057729	0.891054	https://www.genecards.org/cgi-bin/carddisp.pl?gene=KIR3DL1
IL22	Interleukin 22	Protein Coding	40	GC12M068248	0.891054	https://www.genecards.org/cgi-bin/carddisp.pl?gene=IL22
HCRT	Hypocretin Neuropeptide Precursor	Protein Coding	40	GC17M042185	0.891054	https://www.genecards.org/cgi-bin/carddisp.pl?gene=HCRT
EPO	Erythropoietin	Protein Coding	40	GC07P100720	0.891054	https://www.genecards.org/cgi-bin/carddisp.pl?gene=EPO
KLRK1	Killer Cell Lectin Like Receptor K1	Protein Coding	40	GC12M016936	0.891054	https://www.genecards.org/cgi-bin/carddisp.pl?gene=KLRK1
PF4	Platelet Factor 4	Protein Coding	40	GC04M073980	0.891054	https://www.genecards.org/cgi-bin/carddisp.pl?gene=PF4
MYPN	Myopalladin	Protein Coding	40	GC10P068106	0.891054	https://www.genecards.org/cgi-bin/carddisp.pl?gene=MYPN
PIWIL1	Piwi Like RNA-Mediated Gene Silencing 1	Protein Coding	40	GC12P130337	0.891054	https://www.genecards.org/cgi-bin/carddisp.pl?gene=PIWIL1
TRIM63	Tripartite Motif Containing 63	Protein Coding	40	GC01M026062	0.891054	https://www.genecards.org/cgi-bin/carddisp.pl?gene=TRIM63
TREM1	Triggering Receptor Expressed On Myeloid Cells 1	Protein Coding	40	GC06M041267	0.891054	https://www.genecards.org/cgi-bin/carddisp.pl?gene=TREM1
RNASE3	Ribonuclease A Family Member 3	Protein Coding	40	GC14P020891	0.891054	https://www.genecards.org/cgi-bin/carddisp.pl?gene=RNASE3
ISG20	Interferon Stimulated Exonuclease Gene 20	Protein Coding	39	GC15P088635	0.891054	https://www.genecards.org/cgi-bin/carddisp.pl?gene=ISG20
IVNS1ABP	Influenza Virus NS1A Binding Protein	Protein Coding	39	GC01M185302	0.891054	https://www.genecards.org/cgi-bin/carddisp.pl?gene=IVNS1ABP
SERPINB1	Serpin Family B Member 1	Protein Coding	39	GC06M002833	0.891054	https://www.genecards.org/cgi-bin/carddisp.pl?gene=SERPINB1
CHGB	Chromogranin B	Protein Coding	38	GC20P005911	0.891054	https://www.genecards.org/cgi-bin/carddisp.pl?gene=CHGB
ICOSLG	Inducible T Cell Costimulator Ligand	Protein Coding	38	GC21M044222	0.891054	https://www.genecards.org/cgi-bin/carddisp.pl?gene=ICOSLG
NCR2	Natural Cytotoxicity Triggering Receptor 2	Protein Coding	38	GC06P061350	0.891054	https://www.genecards.org/cgi-bin/carddisp.pl?gene=NCR2
LMOD3	Leiomodin 3	Protein Coding	38	GC03M069156	0.891054	https://www.genecards.org/cgi-bin/carddisp.pl?gene=LMOD3
SLAMF1	Signaling Lymphocytic Activation Molecule Family Member 1	Protein Coding	38	GC01M160608	0.891054	https://www.genecards.org/cgi-bin/carddisp.pl?gene=SLAMF1
SLC52A3	Solute Carrier Family 52 Member 3	Protein Coding	38	GC20M000741	0.891054	https://www.genecards.org/cgi-bin/carddisp.pl?gene=SLC52A3
SERPINA7	Serpin Family A Member 7	Protein Coding	38	GC0XM106032	0.891054	https://www.genecards.org/cgi-bin/carddisp.pl?gene=SERPINA7
SLPI	Secretory Leukocyte Peptidase Inhibitor	Protein Coding	38	GC20M045252	0.891054	https://www.genecards.org/cgi-bin/carddisp.pl?gene=SLPI
CCL22	C-C Motif Chemokine Ligand 22	Protein Coding	37	GC16P057359	0.891054	https://www.genecards.org/cgi-bin/carddisp.pl?gene=CCL22
BOLA3	BolA Family Member 3	Protein Coding	37	GC02M074136	0.891054	https://www.genecards.org/cgi-bin/carddisp.pl?gene=BOLA3
HYDIN	HYDIN Axonemal Central Pair Apparatus Protein	Protein Coding	37	GC16M070868	0.891054	https://www.genecards.org/cgi-bin/carddisp.pl?gene=HYDIN
PIWIL4	Piwi Like RNA-Mediated Gene Silencing 4	Protein Coding	37	GC11P094543	0.891054	https://www.genecards.org/cgi-bin/carddisp.pl?gene=PIWIL4
TBL1X	Transducin Beta Like 1 X-Linked	Protein Coding	37	GC0XP009463	0.891054	https://www.genecards.org/cgi-bin/carddisp.pl?gene=TBL1X
DEFB4A	Defensin Beta 4A	Protein Coding	36	GC08P007895	0.891054	https://www.genecards.org/cgi-bin/carddisp.pl?gene=DEFB4A
ACKR1	Atypical Chemokine Receptor 1 (Duffy Blood Group)	Protein Coding	36	GC01P159203	0.891054	https://www.genecards.org/cgi-bin/carddisp.pl?gene=ACKR1
KLHL40	Kelch Like Family Member 40	Protein Coding	36	GC03P042685	0.891054	https://www.genecards.org/cgi-bin/carddisp.pl?gene=KLHL40
NCR1	Natural Cytotoxicity Triggering Receptor 1	Protein Coding	36	GC19P054906	0.891054	https://www.genecards.org/cgi-bin/carddisp.pl?gene=NCR1
LACTB	Lactamase Beta	Protein Coding	35	GC15P081272	0.891054	https://www.genecards.org/cgi-bin/carddisp.pl?gene=LACTB
TRMT10C	TRNA Methyltransferase 10C, Mitochondrial RNase P Subunit	Protein Coding	34	GC03P101561	0.891054	https://www.genecards.org/cgi-bin/carddisp.pl?gene=TRMT10C
ERVW-1	Endogenous Retrovirus Group W Member 1, Envelope	Protein Coding	33	GC07M092468	0.891054	https://www.genecards.org/cgi-bin/carddisp.pl?gene=ERVW-1
HMGXB3	HMG-Box Containing 3	Protein Coding	32	GC05P150000	0.891054	https://www.genecards.org/cgi-bin/carddisp.pl?gene=HMGXB3
MESD	Mesoderm Development LRP Chaperone	Protein Coding	32	GC15M080955	0.891054	https://www.genecards.org/cgi-bin/carddisp.pl?gene=MESD
PAGR1	PAXIP1 Associated Glutamate Rich Protein 1	Protein Coding	32	GC16P034452	0.891054	https://www.genecards.org/cgi-bin/carddisp.pl?gene=PAGR1
SELENON	Selenoprotein N	Protein Coding	31	GC01P025800	0.891054	https://www.genecards.org/cgi-bin/carddisp.pl?gene=SELENON
CNST	Consortin, Connexin Sorting Protein	Protein Coding	30	GC01P246566	0.891054	https://www.genecards.org/cgi-bin/carddisp.pl?gene=CNST
MIR126	MicroRNA 126	RNA Gene	22	GC09P136670	0.891054	https://www.genecards.org/cgi-bin/carddisp.pl?gene=MIR126
MIR99A	MicroRNA 99a	RNA Gene	21	GC21P016539	0.891054	https://www.genecards.org/cgi-bin/carddisp.pl?gene=MIR99A
MIR122	MicroRNA 122	RNA Gene	21	GC18P058451	0.891054	https://www.genecards.org/cgi-bin/carddisp.pl?gene=MIR122
MIR221	MicroRNA 221	RNA Gene	21	GC0XM045746	0.891054	https://www.genecards.org/cgi-bin/carddisp.pl?gene=MIR221
MIR100	MicroRNA 100	RNA Gene	21	GC11M122152	0.891054	https://www.genecards.org/cgi-bin/carddisp.pl?gene=MIR100
LUZP6	Leucine Zipper Protein 6	Protein Coding	21	GC07M135927	0.891054	https://www.genecards.org/cgi-bin/carddisp.pl?gene=LUZP6
MIR365A	MicroRNA 365a	RNA Gene	18	GC16P014309	0.891054	https://www.genecards.org/cgi-bin/carddisp.pl?gene=MIR365A
SAA2-SAA4	SAA2-SAA4 Readthrough	Protein Coding	18	GC11M018233	0.891054	https://www.genecards.org/cgi-bin/carddisp.pl?gene=SAA2-SAA4
RN7SL1	RNA Component Of Signal Recognition Particle 7SL1	RNA Gene	18	GC14P049680	0.891054	https://www.genecards.org/cgi-bin/carddisp.pl?gene=RN7SL1
FAM66D	Family With Sequence Similarity 66 Member D	RNA Gene	17	GC08P012115	0.891054	https://www.genecards.org/cgi-bin/carddisp.pl?gene=FAM66D
MIR486-1	MicroRNA 486-1	RNA Gene	17	GC08M041660	0.891054	https://www.genecards.org/cgi-bin/carddisp.pl?gene=MIR486-1
SNORD15B	Small Nucleolar RNA, C/D Box 15B	RNA Gene	17	GC11P075404	0.891054	https://www.genecards.org/cgi-bin/carddisp.pl?gene=SNORD15B
RN7SL2	RNA Component Of Signal Recognition Particle 7SL2	RNA Gene	17	GC14M049949	0.891054	https://www.genecards.org/cgi-bin/carddisp.pl?gene=RN7SL2
TTN-AS1	TTN Antisense RNA 1	RNA Gene	16	GC02P178521	0.891054	https://www.genecards.org/cgi-bin/carddisp.pl?gene=TTN-AS1
SNORD100	Small Nucleolar RNA, C/D Box 100	RNA Gene	16	GC06P132816	0.891054	https://www.genecards.org/cgi-bin/carddisp.pl?gene=SNORD100
RNY4	RNA, Ro60-Associated Y4	RNA Gene	14	GC07P148963	0.891054	https://www.genecards.org/cgi-bin/carddisp.pl?gene=RNY4
RN7SL3	RNA Component Of Signal Recognition Particle 7SL3	RNA Gene	14	GC14M049944	0.891054	https://www.genecards.org/cgi-bin/carddisp.pl?gene=RN7SL3
LINC02258	Long Intergenic Non-Protein Coding RNA 2258	RNA Gene	10	GC12P087796	0.891054	https://www.genecards.org/cgi-bin/carddisp.pl?gene=LINC02258
SKAP1-AS1	SKAP1 Antisense RNA 1	RNA Gene	9	GC17P048186	0.891054	https://www.genecards.org/cgi-bin/carddisp.pl?gene=SKAP1-AS1
ENSG00000199411	Small Nucleolar RNA SNORD62	RNA Gene	8	GC09P137094	0.891054	https://www.genecards.org/cgi-bin/carddisp.pl?gene=ENSG00000199411
LOC101927055	Uncharacterized LOC101927055	RNA Gene	8	GC02P178776	0.891054	https://www.genecards.org/cgi-bin/carddisp.pl?gene=LOC101927055
ENSG00000202479	Small Nucleolar RNA SNORD14	RNA Gene	8	GC02M024972	0.891054	https://www.genecards.org/cgi-bin/carddisp.pl?gene=ENSG00000202479
ENSG00000202198	7SK RNA	RNA Gene	7	GC06P061475	0.891054	https://www.genecards.org/cgi-bin/carddisp.pl?gene=ENSG00000202198
ENSG00000195401	Y RNA	RNA Gene	5	GC10M068735	0.891054	https://www.genecards.org/cgi-bin/carddisp.pl?gene=ENSG00000195401
DDIT4-AS1	DDIT4 Antisense RNA 1	RNA Gene	4	GC10U902890	0.891054	https://www.genecards.org/cgi-bin/carddisp.pl?gene=DDIT4-AS1
MTOR	Mechanistic Target Of Rapamycin Kinase	Protein Coding	53	GC01M011106	0.865433	https://www.genecards.org/cgi-bin/carddisp.pl?gene=MTOR
DNMT1	DNA Methyltransferase 1	Protein Coding	50	GC19M010133	0.865433	https://www.genecards.org/cgi-bin/carddisp.pl?gene=DNMT1
HDAC2	Histone Deacetylase 2	Protein Coding	50	GC06M113933	0.865433	https://www.genecards.org/cgi-bin/carddisp.pl?gene=HDAC2
PRKACA	Protein Kinase CAMP-Activated Catalytic Subunit Alpha	Protein Coding	50	GC19M014215	0.865433	https://www.genecards.org/cgi-bin/carddisp.pl?gene=PRKACA
ITGB1	Integrin Subunit Beta 1	Protein Coding	49	GC10M032899	0.865433	https://www.genecards.org/cgi-bin/carddisp.pl?gene=ITGB1
CSNK2B	Casein Kinase 2 Beta	Protein Coding	48	GC06P061173	0.865433	https://www.genecards.org/cgi-bin/carddisp.pl?gene=CSNK2B
POR	Cytochrome P450 Oxidoreductase	Protein Coding	48	GC07P075899	0.865433	https://www.genecards.org/cgi-bin/carddisp.pl?gene=POR
RDX	Radixin	Protein Coding	48	GC11M109864	0.865433	https://www.genecards.org/cgi-bin/carddisp.pl?gene=RDX
PLAT	Plasminogen Activator, Tissue Type	Protein Coding	48	GC08M042174	0.865433	https://www.genecards.org/cgi-bin/carddisp.pl?gene=PLAT
IDE	Insulin Degrading Enzyme	Protein Coding	47	GC10M092451	0.865433	https://www.genecards.org/cgi-bin/carddisp.pl?gene=IDE
GLA	Galactosidase Alpha	Protein Coding	47	GC0XM101393	0.865433	https://www.genecards.org/cgi-bin/carddisp.pl?gene=GLA
BRD4	Bromodomain Containing 4	Protein Coding	46	GC19M015236	0.865433	https://www.genecards.org/cgi-bin/carddisp.pl?gene=BRD4
CIT	Citron Rho-Interacting Serine/Threonine Kinase	Protein Coding	46	GC12M119650	0.865433	https://www.genecards.org/cgi-bin/carddisp.pl?gene=CIT
GPX1	Glutathione Peroxidase 1	Protein Coding	46	GC03M049603	0.865433	https://www.genecards.org/cgi-bin/carddisp.pl?gene=GPX1
GGCX	Gamma-Glutamyl Carboxylase	Protein Coding	46	GC02M085544	0.865433	https://www.genecards.org/cgi-bin/carddisp.pl?gene=GGCX
TCF12	Transcription Factor 12	Protein Coding	46	GC15P056918	0.865433	https://www.genecards.org/cgi-bin/carddisp.pl?gene=TCF12
RHOA	Ras Homolog Family Member A	Protein Coding	46	GC03M049359	0.865433	https://www.genecards.org/cgi-bin/carddisp.pl?gene=RHOA
BCKDK	Branched Chain Keto Acid Dehydrogenase Kinase	Protein Coding	45	GC16P034576	0.865433	https://www.genecards.org/cgi-bin/carddisp.pl?gene=BCKDK
ACADM	Acyl-CoA Dehydrogenase Medium Chain	Protein Coding	45	GC01P075724	0.865433	https://www.genecards.org/cgi-bin/carddisp.pl?gene=ACADM
AP3B1	Adaptor Related Protein Complex 3 Subunit Beta 1	Protein Coding	45	GC05M078000	0.865433	https://www.genecards.org/cgi-bin/carddisp.pl?gene=AP3B1
GNB1	G Protein Subunit Beta 1	Protein Coding	45	GC01M001785	0.865433	https://www.genecards.org/cgi-bin/carddisp.pl?gene=GNB1
IMPDH2	Inosine Monophosphate Dehydrogenase 2	Protein Coding	45	GC03M049571	0.865433	https://www.genecards.org/cgi-bin/carddisp.pl?gene=IMPDH2
DDR1	Discoidin Domain Receptor Tyrosine Kinase 1	Protein Coding	45	GC06P061153	0.865433	https://www.genecards.org/cgi-bin/carddisp.pl?gene=DDR1
FBN1	Fibrillin 1	Protein Coding	45	GC15M048408	0.865433	https://www.genecards.org/cgi-bin/carddisp.pl?gene=FBN1
ETFA	Electron Transfer Flavoprotein Subunit Alpha	Protein Coding	45	GC15M076215	0.865433	https://www.genecards.org/cgi-bin/carddisp.pl?gene=ETFA
MIB1	MIB E3 Ubiquitin Protein Ligase 1	Protein Coding	45	GC18P021704	0.865433	https://www.genecards.org/cgi-bin/carddisp.pl?gene=MIB1
RALA	RAS Like Proto-Oncogene A	Protein Coding	45	GC07P039622	0.865433	https://www.genecards.org/cgi-bin/carddisp.pl?gene=RALA
POLA1	DNA Polymerase Alpha 1, Catalytic Subunit	Protein Coding	45	GC0XP024693	0.865433	https://www.genecards.org/cgi-bin/carddisp.pl?gene=POLA1
PKP2	Plakophilin 2	Protein Coding	45	GC12M032790	0.865433	https://www.genecards.org/cgi-bin/carddisp.pl?gene=PKP2
SLC27A2	Solute Carrier Family 27 Member 2	Protein Coding	45	GC15P050182	0.865433	https://www.genecards.org/cgi-bin/carddisp.pl?gene=SLC27A2
PRKAR2A	Protein Kinase CAMP-Dependent Type II Regulatory Subunit Alpha	Protein Coding	45	GC03M048744	0.865433	https://www.genecards.org/cgi-bin/carddisp.pl?gene=PRKAR2A
PPT1	Palmitoyl-Protein Thioesterase 1	Protein Coding	45	GC01M040072	0.865433	https://www.genecards.org/cgi-bin/carddisp.pl?gene=PPT1
ADAMTS1	ADAM Metallopeptidase With Thrombospondin Type 1 Motif 1	Protein Coding	44	GC21M026835	0.865433	https://www.genecards.org/cgi-bin/carddisp.pl?gene=ADAMTS1
BRD2	Bromodomain Containing 2	Protein Coding	44	GC06P061205	0.865433	https://www.genecards.org/cgi-bin/carddisp.pl?gene=BRD2
AASS	Aminoadipate-Semialdehyde Synthase	Protein Coding	44	GC07M122073	0.865433	https://www.genecards.org/cgi-bin/carddisp.pl?gene=AASS
AKAP9	A-Kinase Anchoring Protein 9	Protein Coding	44	GC07P091940	0.865433	https://www.genecards.org/cgi-bin/carddisp.pl?gene=AKAP9
ATP6V1A	ATPase H+ Transporting V1 Subunit A	Protein Coding	44	GC03P113747	0.865433	https://www.genecards.org/cgi-bin/carddisp.pl?gene=ATP6V1A
FBLN5	Fibulin 5	Protein Coding	44	GC14M091869	0.865433	https://www.genecards.org/cgi-bin/carddisp.pl?gene=FBLN5
CYB5R3	Cytochrome B5 Reductase 3	Protein Coding	44	GC22M042617	0.865433	https://www.genecards.org/cgi-bin/carddisp.pl?gene=CYB5R3
GFER	Growth Factor, Augmenter Of Liver Regeneration	Protein Coding	44	GC16P001984	0.865433	https://www.genecards.org/cgi-bin/carddisp.pl?gene=GFER
NGLY1	N-Glycanase 1	Protein Coding	44	GC03M025718	0.865433	https://www.genecards.org/cgi-bin/carddisp.pl?gene=NGLY1
NUP62	Nucleoporin 62	Protein Coding	44	GC19M049906	0.865433	https://www.genecards.org/cgi-bin/carddisp.pl?gene=NUP62
MFGE8	Milk Fat Globule EGF And Factor V/VIII Domain Containing	Protein Coding	44	GC15M088898	0.865433	https://www.genecards.org/cgi-bin/carddisp.pl?gene=MFGE8
LOX	Lysyl Oxidase	Protein Coding	44	GC05M122063	0.865433	https://www.genecards.org/cgi-bin/carddisp.pl?gene=LOX
TLE1	TLE Family Member 1, Transcriptional Corepressor	Protein Coding	44	GC09M081583	0.865433	https://www.genecards.org/cgi-bin/carddisp.pl?gene=TLE1
PRKAR2B	Protein Kinase CAMP-Dependent Type II Regulatory Subunit Beta	Protein Coding	44	GC07P107044	0.865433	https://www.genecards.org/cgi-bin/carddisp.pl?gene=PRKAR2B
AGPS	Alkylglycerone Phosphate Synthase	Protein Coding	43	GC02P177392	0.865433	https://www.genecards.org/cgi-bin/carddisp.pl?gene=AGPS
ARF6	ADP Ribosylation Factor 6	Protein Coding	43	GC14P049895	0.865433	https://www.genecards.org/cgi-bin/carddisp.pl?gene=ARF6
POFUT1	Protein O-Fucosyltransferase 1	Protein Coding	43	GC20P032207	0.865433	https://www.genecards.org/cgi-bin/carddisp.pl?gene=POFUT1
CENPF	Centromere Protein F	Protein Coding	42	GC01P214603	0.865433	https://www.genecards.org/cgi-bin/carddisp.pl?gene=CENPF
COL6A1	Collagen Type VI Alpha 1 Chain	Protein Coding	42	GC21P045981	0.865433	https://www.genecards.org/cgi-bin/carddisp.pl?gene=COL6A1
RAB10	RAB10, Member RAS Oncogene Family	Protein Coding	42	GC02P026033	0.865433	https://www.genecards.org/cgi-bin/carddisp.pl?gene=RAB10
PABPC1	Poly(A) Binding Protein Cytoplasmic 1	Protein Coding	42	GC08M100685	0.865433	https://www.genecards.org/cgi-bin/carddisp.pl?gene=PABPC1
PTGES2	Prostaglandin E Synthase 2	Protein Coding	42	GC09M128120	0.865433	https://www.genecards.org/cgi-bin/carddisp.pl?gene=PTGES2
TLE3	TLE Family Member 3, Transcriptional Corepressor	Protein Coding	42	GC15M070047	0.865433	https://www.genecards.org/cgi-bin/carddisp.pl?gene=TLE3
SLC25A21	Solute Carrier Family 25 Member 21	Protein Coding	42	GC14M036677	0.865433	https://www.genecards.org/cgi-bin/carddisp.pl?gene=SLC25A21
SEPSECS	Sep (O-Phosphoserine) TRNA:Sec (Selenocysteine) TRNA Synthase	Protein Coding	42	GC04M025121	0.865433	https://www.genecards.org/cgi-bin/carddisp.pl?gene=SEPSECS
PRIM1	DNA Primase Subunit 1	Protein Coding	42	GC12M056731	0.865433	https://www.genecards.org/cgi-bin/carddisp.pl?gene=PRIM1
SRP54	Signal Recognition Particle 54	Protein Coding	42	GC14P034981	0.865433	https://www.genecards.org/cgi-bin/carddisp.pl?gene=SRP54
CYB5B	Cytochrome B5 Type B	Protein Coding	41	GC16P069424	0.865433	https://www.genecards.org/cgi-bin/carddisp.pl?gene=CYB5B
AKAP8	A-Kinase Anchoring Protein 8	Protein Coding	41	GC19M015354	0.865433	https://www.genecards.org/cgi-bin/carddisp.pl?gene=AKAP8
CDK5RAP2	CDK5 Regulatory Subunit Associated Protein 2	Protein Coding	41	GC09M120388	0.865433	https://www.genecards.org/cgi-bin/carddisp.pl?gene=CDK5RAP2
EXOSC2	Exosome Component 2	Protein Coding	41	GC09P130693	0.865433	https://www.genecards.org/cgi-bin/carddisp.pl?gene=EXOSC2
EXOSC3	Exosome Component 3	Protein Coding	41	GC09M037772	0.865433	https://www.genecards.org/cgi-bin/carddisp.pl?gene=EXOSC3
HS2ST1	Heparan Sulfate 2-O-Sulfotransferase 1	Protein Coding	41	GC01P086914	0.865433	https://www.genecards.org/cgi-bin/carddisp.pl?gene=HS2ST1
GDF15	Growth Differentiation Factor 15	Protein Coding	41	GC19P029039	0.865433	https://www.genecards.org/cgi-bin/carddisp.pl?gene=GDF15
LARP7	La Ribonucleoprotein 7, Transcriptional Regulator	Protein Coding	41	GC04P112636	0.865433	https://www.genecards.org/cgi-bin/carddisp.pl?gene=LARP7
OS9	OS9 Endoplasmic Reticulum Lectin	Protein Coding	41	GC12P057693	0.865433	https://www.genecards.org/cgi-bin/carddisp.pl?gene=OS9
NPC2	NPC Intracellular Cholesterol Transporter 2	Protein Coding	41	GC14M074476	0.865433	https://www.genecards.org/cgi-bin/carddisp.pl?gene=NPC2
MOGS	Mannosyl-Oligosaccharide Glucosidase	Protein Coding	41	GC02M074461	0.865433	https://www.genecards.org/cgi-bin/carddisp.pl?gene=MOGS
SLC30A9	Solute Carrier Family 30 Member 9	Protein Coding	41	GC04P041992	0.865433	https://www.genecards.org/cgi-bin/carddisp.pl?gene=SLC30A9
TRMT1	TRNA Methyltransferase 1	Protein Coding	41	GC19M013104	0.865433	https://www.genecards.org/cgi-bin/carddisp.pl?gene=TRMT1
PRIM2	DNA Primase Subunit 2	Protein Coding	41	GC06P057314	0.865433	https://www.genecards.org/cgi-bin/carddisp.pl?gene=PRIM2
DNAJC19	DnaJ Heat Shock Protein Family (Hsp40) Member C19	Protein Coding	40	GC03M180983	0.865433	https://www.genecards.org/cgi-bin/carddisp.pl?gene=DNAJC19
ACSL3	Acyl-CoA Synthetase Long Chain Family Member 3	Protein Coding	40	GC02P222860	0.865433	https://www.genecards.org/cgi-bin/carddisp.pl?gene=ACSL3
EXOSC8	Exosome Component 8	Protein Coding	40	GC13P036998	0.865433	https://www.genecards.org/cgi-bin/carddisp.pl?gene=EXOSC8
GNG5	G Protein Subunit Gamma 5	Protein Coding	40	GC01M084498	0.865433	https://www.genecards.org/cgi-bin/carddisp.pl?gene=GNG5
GORASP1	Golgi Reassembly Stacking Protein 1	Protein Coding	40	GC03M039096	0.865433	https://www.genecards.org/cgi-bin/carddisp.pl?gene=GORASP1
FBN2	Fibrillin 2	Protein Coding	40	GC05M128257	0.865433	https://www.genecards.org/cgi-bin/carddisp.pl?gene=FBN2
GOLGA2	Golgin A2	Protein Coding	40	GC09M128255	0.865433	https://www.genecards.org/cgi-bin/carddisp.pl?gene=GOLGA2
NUP88	Nucleoporin 88	Protein Coding	40	GC17M005568	0.865433	https://www.genecards.org/cgi-bin/carddisp.pl?gene=NUP88
MOV10	Mov10 RISC Complex RNA Helicase	Protein Coding	40	GC01P112673	0.865433	https://www.genecards.org/cgi-bin/carddisp.pl?gene=MOV10
MAT2B	Methionine Adenosyltransferase 2B	Protein Coding	40	GC05P163504	0.865433	https://www.genecards.org/cgi-bin/carddisp.pl?gene=MAT2B
RAB5C	RAB5C, Member RAS Oncogene Family	Protein Coding	40	GC17M042124	0.865433	https://www.genecards.org/cgi-bin/carddisp.pl?gene=RAB5C
POLA2	DNA Polymerase Alpha 2, Accessory Subunit	Protein Coding	40	GC11P065409	0.865433	https://www.genecards.org/cgi-bin/carddisp.pl?gene=POLA2
SMOC1	SPARC Related Modular Calcium Binding 1	Protein Coding	40	GC14P069854	0.865433	https://www.genecards.org/cgi-bin/carddisp.pl?gene=SMOC1
STC2	Stanniocalcin 2	Protein Coding	40	GC05M173314	0.865433	https://www.genecards.org/cgi-bin/carddisp.pl?gene=STC2
RNF41	Ring Finger Protein 41	Protein Coding	40	GC12M056202	0.865433	https://www.genecards.org/cgi-bin/carddisp.pl?gene=RNF41
PCSK6	Proprotein Convertase Subtilisin/Kexin Type 6	Protein Coding	40	GC15M109946	0.865433	https://www.genecards.org/cgi-bin/carddisp.pl?gene=PCSK6
SLC44A2	Solute Carrier Family 44 Member 2	Protein Coding	40	GC19P010602	0.865433	https://www.genecards.org/cgi-bin/carddisp.pl?gene=SLC44A2
UPF1	UPF1 RNA Helicase And ATPase	Protein Coding	40	GC19P018831	0.865433	https://www.genecards.org/cgi-bin/carddisp.pl?gene=UPF1
BZW2	Basic Leucine Zipper And W2 Domains 2	Protein Coding	39	GC07P016646	0.865433	https://www.genecards.org/cgi-bin/carddisp.pl?gene=BZW2
AATF	Apoptosis Antagonizing Transcription Factor	Protein Coding	39	GC17P036948	0.865433	https://www.genecards.org/cgi-bin/carddisp.pl?gene=AATF
CWC27	CWC27 Spliceosome Associated Cyclophilin	Protein Coding	39	GC05P064768	0.865433	https://www.genecards.org/cgi-bin/carddisp.pl?gene=CWC27
CRTC3	CREB Regulated Transcription Coactivator 3	Protein Coding	39	GC15P090529	0.865433	https://www.genecards.org/cgi-bin/carddisp.pl?gene=CRTC3
NDUFAF2	NADH:Ubiquinone Oxidoreductase Complex Assembly Factor 2	Protein Coding	39	GC05P060945	0.865433	https://www.genecards.org/cgi-bin/carddisp.pl?gene=NDUFAF2
PSMD8	Proteasome 26S Subunit, Non-ATPase 8	Protein Coding	39	GC19P038374	0.865433	https://www.genecards.org/cgi-bin/carddisp.pl?gene=PSMD8
RAB18	RAB18, Member RAS Oncogene Family	Protein Coding	39	GC10P027504	0.865433	https://www.genecards.org/cgi-bin/carddisp.pl?gene=RAB18
NUP210	Nucleoporin 210	Protein Coding	39	GC03M017906	0.865433	https://www.genecards.org/cgi-bin/carddisp.pl?gene=NUP210
SRP72	Signal Recognition Particle 72	Protein Coding	39	GC04P056466	0.865433	https://www.genecards.org/cgi-bin/carddisp.pl?gene=SRP72
ERGIC1	Endoplasmic Reticulum-Golgi Intermediate Compartment 1	Protein Coding	38	GC05P172834	0.865433	https://www.genecards.org/cgi-bin/carddisp.pl?gene=ERGIC1
GRPEL1	GrpE Like 1, Mitochondrial	Protein Coding	38	GC04M007060	0.865433	https://www.genecards.org/cgi-bin/carddisp.pl?gene=GRPEL1
HOOK1	Hook Microtubule Tethering Protein 1	Protein Coding	38	GC01P059814	0.865433	https://www.genecards.org/cgi-bin/carddisp.pl?gene=HOOK1
LARP1	La Ribonucleoprotein 1, Translational Regulator	Protein Coding	38	GC05P154682	0.865433	https://www.genecards.org/cgi-bin/carddisp.pl?gene=LARP1
RBM28	RNA Binding Motif Protein 28	Protein Coding	38	GC07M128342	0.865433	https://www.genecards.org/cgi-bin/carddisp.pl?gene=RBM28
SLC30A7	Solute Carrier Family 30 Member 7	Protein Coding	38	GC01P100896	0.865433	https://www.genecards.org/cgi-bin/carddisp.pl?gene=SLC30A7
TOR1AIP1	Torsin 1A Interacting Protein 1	Protein Coding	38	GC01P179882	0.865433	https://www.genecards.org/cgi-bin/carddisp.pl?gene=TOR1AIP1
TUBGCP2	Tubulin Gamma Complex Associated Protein 2	Protein Coding	38	GC10M133278	0.865433	https://www.genecards.org/cgi-bin/carddisp.pl?gene=TUBGCP2
SNIP1	Smad Nuclear Interacting Protein 1	Protein Coding	38	GC01M037534	0.865433	https://www.genecards.org/cgi-bin/carddisp.pl?gene=SNIP1
REEP6	Receptor Accessory Protein 6	Protein Coding	38	GC19P001491	0.865433	https://www.genecards.org/cgi-bin/carddisp.pl?gene=REEP6
STOM	Stomatin	Protein Coding	38	GC09M121338	0.865433	https://www.genecards.org/cgi-bin/carddisp.pl?gene=STOM
SRP19	Signal Recognition Particle 19	Protein Coding	38	GC05P112862	0.865433	https://www.genecards.org/cgi-bin/carddisp.pl?gene=SRP19
CHPF	Chondroitin Polymerizing Factor	Protein Coding	37	GC02M219538	0.865433	https://www.genecards.org/cgi-bin/carddisp.pl?gene=CHPF
CEP68	Centrosomal Protein 68	Protein Coding	37	GC02P065056	0.865433	https://www.genecards.org/cgi-bin/carddisp.pl?gene=CEP68
AP2A2	Adaptor Related Protein Complex 2 Subunit Alpha 2	Protein Coding	37	GC11P000924	0.865433	https://www.genecards.org/cgi-bin/carddisp.pl?gene=AP2A2
INHBE	Inhibin Subunit Beta E	Protein Coding	37	GC12P057452	0.865433	https://www.genecards.org/cgi-bin/carddisp.pl?gene=INHBE
DDX21	DExD-Box Helicase 21	Protein Coding	37	GC10P068956	0.865433	https://www.genecards.org/cgi-bin/carddisp.pl?gene=DDX21
DDX10	DEAD-Box Helicase 10	Protein Coding	37	GC11P108569	0.865433	https://www.genecards.org/cgi-bin/carddisp.pl?gene=DDX10
EXOSC5	Exosome Component 5	Protein Coding	37	GC19M051172	0.865433	https://www.genecards.org/cgi-bin/carddisp.pl?gene=EXOSC5
GCC2	GRIP And Coiled-Coil Domain Containing 2	Protein Coding	37	GC02P108432	0.865433	https://www.genecards.org/cgi-bin/carddisp.pl?gene=GCC2
JAKMIP1	Janus Kinase And Microtubule Interacting Protein 1	Protein Coding	37	GC04M006026	0.865433	https://www.genecards.org/cgi-bin/carddisp.pl?gene=JAKMIP1
NUP54	Nucleoporin 54	Protein Coding	37	GC04M076114	0.865433	https://www.genecards.org/cgi-bin/carddisp.pl?gene=NUP54
NUTF2	Nuclear Transport Factor 2	Protein Coding	37	GC16P067846	0.865433	https://www.genecards.org/cgi-bin/carddisp.pl?gene=NUTF2
MPHOSPH10	M-Phase Phosphoprotein 10	Protein Coding	37	GC02P071130	0.865433	https://www.genecards.org/cgi-bin/carddisp.pl?gene=MPHOSPH10
MRPS2	Mitochondrial Ribosomal Protein S2	Protein Coding	37	GC09P135499	0.865433	https://www.genecards.org/cgi-bin/carddisp.pl?gene=MRPS2
MRPS25	Mitochondrial Ribosomal Protein S25	Protein Coding	37	GC03M017929	0.865433	https://www.genecards.org/cgi-bin/carddisp.pl?gene=MRPS25
PPIL3	Peptidylprolyl Isomerase Like 3	Protein Coding	37	GC02M200870	0.865433	https://www.genecards.org/cgi-bin/carddisp.pl?gene=PPIL3
SUN2	Sad1 And UNC84 Domain Containing 2	Protein Coding	37	GC22M050946	0.865433	https://www.genecards.org/cgi-bin/carddisp.pl?gene=SUN2
TIMM9	Translocase Of Inner Mitochondrial Membrane 9	Protein Coding	37	GC14M058408	0.865433	https://www.genecards.org/cgi-bin/carddisp.pl?gene=TIMM9
TIMM8B	Translocase Of Inner Mitochondrial Membrane 8 Homolog B	Protein Coding	37	GC11M112084	0.865433	https://www.genecards.org/cgi-bin/carddisp.pl?gene=TIMM8B
TUBGCP3	Tubulin Gamma Complex Associated Protein 3	Protein Coding	37	GC13M112485	0.865433	https://www.genecards.org/cgi-bin/carddisp.pl?gene=TUBGCP3
SDF2	Stromal Cell Derived Factor 2	Protein Coding	37	GC17M031865	0.865433	https://www.genecards.org/cgi-bin/carddisp.pl?gene=SDF2
SLU7	SLU7 Homolog, Splicing Factor	Protein Coding	37	GC05M160401	0.865433	https://www.genecards.org/cgi-bin/carddisp.pl?gene=SLU7
NINL	Ninein Like	Protein Coding	37	GC20M025452	0.865433	https://www.genecards.org/cgi-bin/carddisp.pl?gene=NINL
DCAKD	Dephospho-CoA Kinase Domain Containing	Protein Coding	36	GC17M045023	0.865433	https://www.genecards.org/cgi-bin/carddisp.pl?gene=DCAKD
COLGALT1	Collagen Beta(1-O)Galactosyltransferase 1	Protein Coding	36	GC19P017555	0.865433	https://www.genecards.org/cgi-bin/carddisp.pl?gene=COLGALT1
MRPS5	Mitochondrial Ribosomal Protein S5	Protein Coding	36	GC02M096615	0.865433	https://www.genecards.org/cgi-bin/carddisp.pl?gene=MRPS5
MRPS27	Mitochondrial Ribosomal Protein S27	Protein Coding	36	GC05M072219	0.865433	https://www.genecards.org/cgi-bin/carddisp.pl?gene=MRPS27
TBCA	Tubulin Folding Cofactor A	Protein Coding	36	GC05M077691	0.865433	https://www.genecards.org/cgi-bin/carddisp.pl?gene=TBCA
THTPA	Thiamine Triphosphatase	Protein Coding	36	GC14P027524	0.865433	https://www.genecards.org/cgi-bin/carddisp.pl?gene=THTPA
PLEKHA5	Pleckstrin Homology Domain Containing A5	Protein Coding	36	GC12P019129	0.865433	https://www.genecards.org/cgi-bin/carddisp.pl?gene=PLEKHA5
PLEKHF2	Pleckstrin Homology And FYVE Domain Containing 2	Protein Coding	36	GC08P095133	0.865433	https://www.genecards.org/cgi-bin/carddisp.pl?gene=PLEKHF2
ZNF318	Zinc Finger Protein 318	Protein Coding	36	GC06M051660	0.865433	https://www.genecards.org/cgi-bin/carddisp.pl?gene=ZNF318
FKBP7	FKBP Prolyl Isomerase 7	Protein Coding	35	GC02M178463	0.865433	https://www.genecards.org/cgi-bin/carddisp.pl?gene=FKBP7
EMC1	ER Membrane Protein Complex Subunit 1	Protein Coding	35	GC01M019215	0.865433	https://www.genecards.org/cgi-bin/carddisp.pl?gene=EMC1
GCC1	GRIP And Coiled-Coil Domain Containing 1	Protein Coding	35	GC07M127580	0.865433	https://www.genecards.org/cgi-bin/carddisp.pl?gene=GCC1
PDZD11	PDZ Domain Containing 11	Protein Coding	35	GC0XM070286	0.865433	https://www.genecards.org/cgi-bin/carddisp.pl?gene=PDZD11
NSD2	Nuclear Receptor Binding SET Domain Protein 2	Protein Coding	35	GC04P001872	0.865433	https://www.genecards.org/cgi-bin/carddisp.pl?gene=NSD2
TIMM10	Translocase Of Inner Mitochondrial Membrane 10	Protein Coding	35	GC11M074109	0.865433	https://www.genecards.org/cgi-bin/carddisp.pl?gene=TIMM10
ZC3H7A	Zinc Finger CCCH-Type Containing 7A	Protein Coding	35	GC16M011750	0.865433	https://www.genecards.org/cgi-bin/carddisp.pl?gene=ZC3H7A
UBAP2L	Ubiquitin Associated Protein 2 Like	Protein Coding	35	GC01P154219	0.865433	https://www.genecards.org/cgi-bin/carddisp.pl?gene=UBAP2L
ZNF503	Zinc Finger Protein 503	Protein Coding	35	GC10M075280	0.865433	https://www.genecards.org/cgi-bin/carddisp.pl?gene=ZNF503
AAR2	AAR2 Splicing Factor	Protein Coding	34	GC20P036236	0.865433	https://www.genecards.org/cgi-bin/carddisp.pl?gene=AAR2
CEP350	Centrosomal Protein 350	Protein Coding	34	GC01P179955	0.865433	https://www.genecards.org/cgi-bin/carddisp.pl?gene=CEP350
FAM162A	Family With Sequence Similarity 162 Member A	Protein Coding	34	GC03P122384	0.865433	https://www.genecards.org/cgi-bin/carddisp.pl?gene=FAM162A
FBXL12	F-Box And Leucine Rich Repeat Protein 12	Protein Coding	34	GC19M009810	0.865433	https://www.genecards.org/cgi-bin/carddisp.pl?gene=FBXL12
DCAF7	DDB1 And CUL4 Associated Factor 7	Protein Coding	34	GC17P063550	0.865433	https://www.genecards.org/cgi-bin/carddisp.pl?gene=DCAF7
GRIPAP1	GRIP1 Associated Protein 1	Protein Coding	34	GC0XM048973	0.865433	https://www.genecards.org/cgi-bin/carddisp.pl?gene=GRIPAP1
MIPOL1	Mirror-Image Polydactyly 1	Protein Coding	34	GC14P037197	0.865433	https://www.genecards.org/cgi-bin/carddisp.pl?gene=MIPOL1
TBKBP1	TBK1 Binding Protein 1	Protein Coding	34	GC17P047694	0.865433	https://www.genecards.org/cgi-bin/carddisp.pl?gene=TBKBP1
SBNO1	Strawberry Notch Homolog 1	Protein Coding	34	GC12M123289	0.865433	https://www.genecards.org/cgi-bin/carddisp.pl?gene=SBNO1
TYSND1	Trypsin Like Peroxisomal Matrix Peptidase 1	Protein Coding	34	GC10M070137	0.865433	https://www.genecards.org/cgi-bin/carddisp.pl?gene=TYSND1
USP54	Ubiquitin Specific Peptidase 54	Protein Coding	34	GC10M073497	0.865433	https://www.genecards.org/cgi-bin/carddisp.pl?gene=USP54
CLIP4	CAP-Gly Domain Containing Linker Protein Family Member 4	Protein Coding	33	GC02P029097	0.865433	https://www.genecards.org/cgi-bin/carddisp.pl?gene=CLIP4
CEP112	Centrosomal Protein 112	Protein Coding	33	GC17M065635	0.865433	https://www.genecards.org/cgi-bin/carddisp.pl?gene=CEP112
IFNL3	Interferon Lambda 3	Protein Coding	33	GC19M039243	0.865433	https://www.genecards.org/cgi-bin/carddisp.pl?gene=IFNL3
FKBP15	FKBP Prolyl Isomerase Family Member 15	Protein Coding	33	GC09M113161	0.865433	https://www.genecards.org/cgi-bin/carddisp.pl?gene=FKBP15
ELOB	Elongin B	Protein Coding	33	GC16M004218	0.865433	https://www.genecards.org/cgi-bin/carddisp.pl?gene=ELOB
HSBP1	Heat Shock Factor Binding Protein 1	Protein Coding	33	GC16P083807	0.865433	https://www.genecards.org/cgi-bin/carddisp.pl?gene=HSBP1
ELOC	Elongin C	Protein Coding	33	GC08M073939	0.865433	https://www.genecards.org/cgi-bin/carddisp.pl?gene=ELOC
FOXRED2	FAD Dependent Oxidoreductase Domain Containing 2	Protein Coding	33	GC22M036487	0.865433	https://www.genecards.org/cgi-bin/carddisp.pl?gene=FOXRED2
NAT14	N-Acetyltransferase 14 (Putative)	Protein Coding	33	GC19P057768	0.865433	https://www.genecards.org/cgi-bin/carddisp.pl?gene=NAT14
NOL10	Nucleolar Protein 10	Protein Coding	33	GC02M010662	0.865433	https://www.genecards.org/cgi-bin/carddisp.pl?gene=NOL10
MEPCE	Methylphosphate Capping Enzyme	Protein Coding	33	GC07P100428	0.865433	https://www.genecards.org/cgi-bin/carddisp.pl?gene=MEPCE
RRP9	Ribosomal RNA Processing 9, U3 Small Nucleolar RNA Binding Protein	Protein Coding	33	GC03M051943	0.865433	https://www.genecards.org/cgi-bin/carddisp.pl?gene=RRP9
TM2D3	TM2 Domain Containing 3	Protein Coding	33	GC15M101621	0.865433	https://www.genecards.org/cgi-bin/carddisp.pl?gene=TM2D3
YIF1A	Yip1 Interacting Factor Homolog A, Membrane Trafficking Protein	Protein Coding	33	GC11M074580	0.865433	https://www.genecards.org/cgi-bin/carddisp.pl?gene=YIF1A
ERO1B	Endoplasmic Reticulum Oxidoreductase 1 Beta	Protein Coding	32	GC01M236216	0.865433	https://www.genecards.org/cgi-bin/carddisp.pl?gene=ERO1B
FASTKD5	FAST Kinase Domains 5	Protein Coding	32	GC20M003171	0.865433	https://www.genecards.org/cgi-bin/carddisp.pl?gene=FASTKD5
LARP4B	La Ribonucleoprotein 4B	Protein Coding	32	GC10M000806	0.865433	https://www.genecards.org/cgi-bin/carddisp.pl?gene=LARP4B
MAP7D1	MAP7 Domain Containing 1	Protein Coding	32	GC01P036155	0.865433	https://www.genecards.org/cgi-bin/carddisp.pl?gene=MAP7D1
NGDN	Neuroguidin	Protein Coding	32	GC14P023469	0.865433	https://www.genecards.org/cgi-bin/carddisp.pl?gene=NGDN
SAAL1	Serum Amyloid A Like 1	Protein Coding	32	GC11M018069	0.865433	https://www.genecards.org/cgi-bin/carddisp.pl?gene=SAAL1
UBAP2	Ubiquitin Associated Protein 2	Protein Coding	32	GC09M033921	0.865433	https://www.genecards.org/cgi-bin/carddisp.pl?gene=UBAP2
PRRC2B	Proline Rich Coiled-Coil 2B	Protein Coding	31	GC09P131373	0.865433	https://www.genecards.org/cgi-bin/carddisp.pl?gene=PRRC2B
RBM41	RNA Binding Motif Protein 41	Protein Coding	31	GC0XM107052	0.865433	https://www.genecards.org/cgi-bin/carddisp.pl?gene=RBM41
PUSL1	Pseudouridine Synthase Like 1	Protein Coding	31	GC01P001308	0.865433	https://www.genecards.org/cgi-bin/carddisp.pl?gene=PUSL1
ZC3H18	Zinc Finger CCCH-Type Containing 18	Protein Coding	31	GC16P088570	0.865433	https://www.genecards.org/cgi-bin/carddisp.pl?gene=ZC3H18
ATP5MG	ATP Synthase Membrane Subunit G	Protein Coding	30	GC11P118403	0.865433	https://www.genecards.org/cgi-bin/carddisp.pl?gene=ATP5MG
HEATR3	HEAT Repeat Containing 3	Protein Coding	30	GC16P050065	0.865433	https://www.genecards.org/cgi-bin/carddisp.pl?gene=HEATR3
TLE5	TLE Family Member 5, Transcriptional Modulator	Protein Coding	30	GC19M003053	0.865433	https://www.genecards.org/cgi-bin/carddisp.pl?gene=TLE5
CISD3	CDGSH Iron Sulfur Domain 3	Protein Coding	29	GC17P038730	0.865433	https://www.genecards.org/cgi-bin/carddisp.pl?gene=CISD3
CEP43	Centrosomal Protein 43	Protein Coding	29	GC06P167001	0.865433	https://www.genecards.org/cgi-bin/carddisp.pl?gene=CEP43
C1orf50	Chromosome 1 Open Reading Frame 50	Protein Coding	29	GC01P042768	0.865433	https://www.genecards.org/cgi-bin/carddisp.pl?gene=C1orf50
NUP58	Nucleoporin 58	Protein Coding	29	GC13P025302	0.865433	https://www.genecards.org/cgi-bin/carddisp.pl?gene=NUP58
WASHC4	WASH Complex Subunit 4	Protein Coding	29	GC12P105108	0.865433	https://www.genecards.org/cgi-bin/carddisp.pl?gene=WASHC4
MTARC1	Mitochondrial Amidoxime Reducing Component 1	Protein Coding	27	GC01P220788	0.865433	https://www.genecards.org/cgi-bin/carddisp.pl?gene=MTARC1
POGLUT2	Protein O-Glucosyltransferase 2	Protein Coding	25	GC13M102785	0.865433	https://www.genecards.org/cgi-bin/carddisp.pl?gene=POGLUT2
POGLUT3	Protein O-Glucosyltransferase 3	Protein Coding	25	GC11M108473	0.865433	https://www.genecards.org/cgi-bin/carddisp.pl?gene=POGLUT3
TIMM29	Translocase Of Inner Mitochondrial Membrane 29	Protein Coding	24	GC19P010929	0.865433	https://www.genecards.org/cgi-bin/carddisp.pl?gene=TIMM29
ITGB2	Integrin Subunit Beta 2	Protein Coding	49	GC21M044885	0.85198	https://www.genecards.org/cgi-bin/carddisp.pl?gene=ITGB2
TMEM41B	Transmembrane Protein 41B	Protein Coding	31	GC11M009280	0.85198	https://www.genecards.org/cgi-bin/carddisp.pl?gene=TMEM41B
CST3	Cystatin C	Protein Coding	43	GC20M023627	0.834742	https://www.genecards.org/cgi-bin/carddisp.pl?gene=CST3
P4HB	Prolyl 4-Hydroxylase Subunit Beta	Protein Coding	48	GC17M081843	0.807801	https://www.genecards.org/cgi-bin/carddisp.pl?gene=P4HB
STIM1	Stromal Interaction Molecule 1	Protein Coding	47	GC11P003855	0.807801	https://www.genecards.org/cgi-bin/carddisp.pl?gene=STIM1
ALDH7A1	Aldehyde Dehydrogenase 7 Family Member A1	Protein Coding	46	GC05M126541	0.807801	https://www.genecards.org/cgi-bin/carddisp.pl?gene=ALDH7A1
GALNT2	Polypeptide N-Acetylgalactosaminyltransferase 2	Protein Coding	45	GC01P230057	0.807801	https://www.genecards.org/cgi-bin/carddisp.pl?gene=GALNT2
CCR4	C-C Motif Chemokine Receptor 4	Protein Coding	44	GC03P032951	0.807801	https://www.genecards.org/cgi-bin/carddisp.pl?gene=CCR4
EIF2B1	Eukaryotic Translation Initiation Factor 2B Subunit Alpha	Protein Coding	42	GC12M123620	0.807801	https://www.genecards.org/cgi-bin/carddisp.pl?gene=EIF2B1
PDIA4	Protein Disulfide Isomerase Family A Member 4	Protein Coding	41	GC07M149003	0.807801	https://www.genecards.org/cgi-bin/carddisp.pl?gene=PDIA4
TOM1	Target Of Myb1 Membrane Trafficking Protein	Protein Coding	41	GC22P035299	0.807801	https://www.genecards.org/cgi-bin/carddisp.pl?gene=TOM1
SEL1L	SEL1L Adaptor Subunit Of ERAD E3 Ubiquitin Ligase	Protein Coding	41	GC14M081471	0.807801	https://www.genecards.org/cgi-bin/carddisp.pl?gene=SEL1L
PCM1	Pericentriolar Material 1	Protein Coding	41	GC08P017922	0.807801	https://www.genecards.org/cgi-bin/carddisp.pl?gene=PCM1
PLOD1	Procollagen-Lysine,2-Oxoglutarate 5-Dioxygenase 1	Protein Coding	41	GC01P011934	0.807801	https://www.genecards.org/cgi-bin/carddisp.pl?gene=PLOD1
FUCA2	Alpha-L-Fucosidase 2	Protein Coding	40	GC06M143494	0.807801	https://www.genecards.org/cgi-bin/carddisp.pl?gene=FUCA2
PIBF1	Progesterone Immunomodulatory Binding Factor 1	Protein Coding	40	GC13P072782	0.807801	https://www.genecards.org/cgi-bin/carddisp.pl?gene=PIBF1
RCHY1	Ring Finger And CHY Zinc Finger Domain Containing 1	Protein Coding	40	GC04M075479	0.807801	https://www.genecards.org/cgi-bin/carddisp.pl?gene=RCHY1
CCDC22	Coiled-Coil Domain Containing 22	Protein Coding	38	GC0XP049514	0.807801	https://www.genecards.org/cgi-bin/carddisp.pl?gene=CCDC22
FXR2	FMR1 Autosomal Homolog 2	Protein Coding	38	GC17M007592	0.807801	https://www.genecards.org/cgi-bin/carddisp.pl?gene=FXR2
MKRN2	Makorin Ring Finger Protein 2	Protein Coding	38	GC03P012561	0.807801	https://www.genecards.org/cgi-bin/carddisp.pl?gene=MKRN2
TES	Testin LIM Domain Protein	Protein Coding	38	GC07P116210	0.807801	https://www.genecards.org/cgi-bin/carddisp.pl?gene=TES
TRMT2A	TRNA Methyltransferase 2 Homolog A	Protein Coding	38	GC22M020099	0.807801	https://www.genecards.org/cgi-bin/carddisp.pl?gene=TRMT2A
ASCC3	Activating Signal Cointegrator 1 Complex Subunit 3	Protein Coding	37	GC06M100508	0.807801	https://www.genecards.org/cgi-bin/carddisp.pl?gene=ASCC3
MYO18A	Myosin XVIIIA	Protein Coding	37	GC17M031875	0.807801	https://www.genecards.org/cgi-bin/carddisp.pl?gene=MYO18A
TBC1D15	TBC1 Domain Family Member 15	Protein Coding	37	GC12P071839	0.807801	https://www.genecards.org/cgi-bin/carddisp.pl?gene=TBC1D15
UGGT1	UDP-Glucose Glycoprotein Glucosyltransferase 1	Protein Coding	37	GC02P128091	0.807801	https://www.genecards.org/cgi-bin/carddisp.pl?gene=UGGT1
XPO4	Exportin 4	Protein Coding	37	GC13M020777	0.807801	https://www.genecards.org/cgi-bin/carddisp.pl?gene=XPO4
DNAJB4	DnaJ Heat Shock Protein Family (Hsp40) Member B4	Protein Coding	36	GC01P077979	0.807801	https://www.genecards.org/cgi-bin/carddisp.pl?gene=DNAJB4
RNH1	Ribonuclease/Angiogenin Inhibitor 1	Protein Coding	36	GC11M001526	0.807801	https://www.genecards.org/cgi-bin/carddisp.pl?gene=RNH1
ZFR	Zinc Finger RNA Binding Protein	Protein Coding	36	GC05M032390	0.807801	https://www.genecards.org/cgi-bin/carddisp.pl?gene=ZFR
ERO1A	Endoplasmic Reticulum Oxidoreductase 1 Alpha	Protein Coding	34	GC14M052640	0.807801	https://www.genecards.org/cgi-bin/carddisp.pl?gene=ERO1A
ARMCX3	Armadillo Repeat Containing X-Linked 3	Protein Coding	33	GC0XP101622	0.807801	https://www.genecards.org/cgi-bin/carddisp.pl?gene=ARMCX3
CEP131	Centrosomal Protein 131	Protein Coding	33	GC17M081189	0.807801	https://www.genecards.org/cgi-bin/carddisp.pl?gene=CEP131
URB2	URB2 Ribosome Biogenesis Homolog	Protein Coding	33	GC01P229626	0.807801	https://www.genecards.org/cgi-bin/carddisp.pl?gene=URB2
SPATA5L1	Spermatogenesis Associated 5 Like 1	Protein Coding	32	GC15P045402	0.807801	https://www.genecards.org/cgi-bin/carddisp.pl?gene=SPATA5L1
UTP20	UTP20 Small Subunit Processome Component	Protein Coding	30	GC12P101280	0.807801	https://www.genecards.org/cgi-bin/carddisp.pl?gene=UTP20
URB1	URB1 Ribosome Biogenesis Homolog	Protein Coding	30	GC21M032312	0.807801	https://www.genecards.org/cgi-bin/carddisp.pl?gene=URB1
GCN1	GCN1 Activator Of EIF2AK4	Protein Coding	28	GC12M120128	0.807801	https://www.genecards.org/cgi-bin/carddisp.pl?gene=GCN1
PUM3	Pumilio RNA Binding Family Member 3	Protein Coding	28	GC09M002721	0.807801	https://www.genecards.org/cgi-bin/carddisp.pl?gene=PUM3
IFITM1	Interferon Induced Transmembrane Protein 1	Protein Coding	41	GC11P000313	0.78694	https://www.genecards.org/cgi-bin/carddisp.pl?gene=IFITM1
SNX17	Sorting Nexin 17	Protein Coding	36	GC02P027370	0.78694	https://www.genecards.org/cgi-bin/carddisp.pl?gene=SNX17
TMEM41A	Transmembrane Protein 41A	Protein Coding	33	GC03M185476	0.78694	https://www.genecards.org/cgi-bin/carddisp.pl?gene=TMEM41A
JAK2	Janus Kinase 2	Protein Coding	52	GC09P004985	0.786293	https://www.genecards.org/cgi-bin/carddisp.pl?gene=JAK2
TP53	Tumor Protein P53	Protein Coding	52	GC17M007661	0.786293	https://www.genecards.org/cgi-bin/carddisp.pl?gene=TP53
AXL	AXL Receptor Tyrosine Kinase	Protein Coding	50	GC19P041219	0.786293	https://www.genecards.org/cgi-bin/carddisp.pl?gene=AXL
GSK3B	Glycogen Synthase Kinase 3 Beta	Protein Coding	49	GC03M119821	0.786293	https://www.genecards.org/cgi-bin/carddisp.pl?gene=GSK3B
LDLR	Low Density Lipoprotein Receptor	Protein Coding	48	GC19P011091	0.786293	https://www.genecards.org/cgi-bin/carddisp.pl?gene=LDLR
ATP7B	ATPase Copper Transporting Beta	Protein Coding	47	GC13M051930	0.786293	https://www.genecards.org/cgi-bin/carddisp.pl?gene=ATP7B
SPTLC2	Serine Palmitoyltransferase Long Chain Base Subunit 2	Protein Coding	47	GC14M077505	0.786293	https://www.genecards.org/cgi-bin/carddisp.pl?gene=SPTLC2
FANCD2	FA Complementation Group D2	Protein Coding	46	GC03P010026	0.786293	https://www.genecards.org/cgi-bin/carddisp.pl?gene=FANCD2
LMAN1	Lectin, Mannose Binding 1	Protein Coding	45	GC18M059327	0.786293	https://www.genecards.org/cgi-bin/carddisp.pl?gene=LMAN1
IGF2R	Insulin Like Growth Factor 2 Receptor	Protein Coding	45	GC06P159969	0.786293	https://www.genecards.org/cgi-bin/carddisp.pl?gene=IGF2R
SLC19A2	Solute Carrier Family 19 Member 2	Protein Coding	45	GC01M169463	0.786293	https://www.genecards.org/cgi-bin/carddisp.pl?gene=SLC19A2
CUX1	Cut Like Homeobox 1	Protein Coding	44	GC07P101815	0.786293	https://www.genecards.org/cgi-bin/carddisp.pl?gene=CUX1
ATP2B4	ATPase Plasma Membrane Ca2+ Transporting 4	Protein Coding	44	GC01P203626	0.786293	https://www.genecards.org/cgi-bin/carddisp.pl?gene=ATP2B4
FADS2	Fatty Acid Desaturase 2	Protein Coding	44	GC11P061792	0.786293	https://www.genecards.org/cgi-bin/carddisp.pl?gene=FADS2
MARK2	Microtubule Affinity Regulating Kinase 2	Protein Coding	44	GC11P063838	0.786293	https://www.genecards.org/cgi-bin/carddisp.pl?gene=MARK2
RAD23B	RAD23 Homolog B, Nucleotide Excision Repair Protein	Protein Coding	44	GC09P107283	0.786293	https://www.genecards.org/cgi-bin/carddisp.pl?gene=RAD23B
NSF	N-Ethylmaleimide Sensitive Factor, Vesicle Fusing ATPase	Protein Coding	44	GC17P046590	0.786293	https://www.genecards.org/cgi-bin/carddisp.pl?gene=NSF
B3GAT3	Beta-1,3-Glucuronyltransferase 3	Protein Coding	43	GC11M074341	0.786293	https://www.genecards.org/cgi-bin/carddisp.pl?gene=B3GAT3
BAG3	BAG Cochaperone 3	Protein Coding	43	GC10P119651	0.786293	https://www.genecards.org/cgi-bin/carddisp.pl?gene=BAG3
FUT8	Fucosyltransferase 8	Protein Coding	43	GC14P065411	0.786293	https://www.genecards.org/cgi-bin/carddisp.pl?gene=FUT8
DNAJB1	DnaJ Heat Shock Protein Family (Hsp40) Member B1	Protein Coding	42	GC19M014514	0.786293	https://www.genecards.org/cgi-bin/carddisp.pl?gene=DNAJB1
ELOVL5	ELOVL Fatty Acid Elongase 5	Protein Coding	42	GC06M053267	0.786293	https://www.genecards.org/cgi-bin/carddisp.pl?gene=ELOVL5
SLC39A14	Solute Carrier Family 39 Member 14	Protein Coding	42	GC08P022367	0.786293	https://www.genecards.org/cgi-bin/carddisp.pl?gene=SLC39A14
STT3B	STT3 Oligosaccharyltransferase Complex Catalytic Subunit B	Protein Coding	42	GC03P031550	0.786293	https://www.genecards.org/cgi-bin/carddisp.pl?gene=STT3B
DAD1	Defender Against Cell Death 1	Protein Coding	40	GC14M022565	0.786293	https://www.genecards.org/cgi-bin/carddisp.pl?gene=DAD1
LMO7	LIM Domain 7	Protein Coding	40	GC13P075620	0.786293	https://www.genecards.org/cgi-bin/carddisp.pl?gene=LMO7
UBE3C	Ubiquitin Protein Ligase E3C	Protein Coding	40	GC07P157138	0.786293	https://www.genecards.org/cgi-bin/carddisp.pl?gene=UBE3C
SLC6A15	Solute Carrier Family 6 Member 15	Protein Coding	40	GC12M084859	0.786293	https://www.genecards.org/cgi-bin/carddisp.pl?gene=SLC6A15
STXBP3	Syntaxin Binding Protein 3	Protein Coding	40	GC01P108746	0.786293	https://www.genecards.org/cgi-bin/carddisp.pl?gene=STXBP3
DOCK6	Dedicator Of Cytokinesis 6	Protein Coding	39	GC19M011199	0.786293	https://www.genecards.org/cgi-bin/carddisp.pl?gene=DOCK6
CHPT1	Choline Phosphotransferase 1	Protein Coding	39	GC12P101696	0.786293	https://www.genecards.org/cgi-bin/carddisp.pl?gene=CHPT1
BAG5	BAG Cochaperone 5	Protein Coding	39	GC14M103556	0.786293	https://www.genecards.org/cgi-bin/carddisp.pl?gene=BAG5
ATP13A1	ATPase 13A1	Protein Coding	39	GC19M019645	0.786293	https://www.genecards.org/cgi-bin/carddisp.pl?gene=ATP13A1
KDELR1	KDEL Endoplasmic Reticulum Protein Retention Receptor 1	Protein Coding	39	GC19M048382	0.786293	https://www.genecards.org/cgi-bin/carddisp.pl?gene=KDELR1
PIGT	Phosphatidylinositol Glycan Anchor Biosynthesis Class T	Protein Coding	39	GC20P045416	0.786293	https://www.genecards.org/cgi-bin/carddisp.pl?gene=PIGT
TRIM9	Tripartite Motif Containing 9	Protein Coding	39	GC14M050975	0.786293	https://www.genecards.org/cgi-bin/carddisp.pl?gene=TRIM9
PPP1R12B	Protein Phosphatase 1 Regulatory Subunit 12B	Protein Coding	39	GC01P202348	0.786293	https://www.genecards.org/cgi-bin/carddisp.pl?gene=PPP1R12B
MTX1	Metaxin 1	Protein Coding	38	GC01P155208	0.786293	https://www.genecards.org/cgi-bin/carddisp.pl?gene=MTX1
PIGS	Phosphatidylinositol Glycan Anchor Biosynthesis Class S	Protein Coding	38	GC17M028553	0.786293	https://www.genecards.org/cgi-bin/carddisp.pl?gene=PIGS
FASTKD1	FAST Kinase Domains 1	Protein Coding	37	GC02M169529	0.786293	https://www.genecards.org/cgi-bin/carddisp.pl?gene=FASTKD1
IPO13	Importin 13	Protein Coding	37	GC01P043947	0.786293	https://www.genecards.org/cgi-bin/carddisp.pl?gene=IPO13
SARM1	Sterile Alpha And TIR Motif Containing 1	Protein Coding	37	GC17P028364	0.786293	https://www.genecards.org/cgi-bin/carddisp.pl?gene=SARM1
SCFD1	Sec1 Family Domain Containing 1	Protein Coding	37	GC14P030622	0.786293	https://www.genecards.org/cgi-bin/carddisp.pl?gene=SCFD1
RFT1	RFT1 Homolog	Protein Coding	37	GC03M053071	0.786293	https://www.genecards.org/cgi-bin/carddisp.pl?gene=RFT1
COPG2	COPI Coat Complex Subunit Gamma 2	Protein Coding	36	GC07M130506	0.786293	https://www.genecards.org/cgi-bin/carddisp.pl?gene=COPG2
LETMD1	LETM1 Domain Containing 1	Protein Coding	36	GC12P051047	0.786293	https://www.genecards.org/cgi-bin/carddisp.pl?gene=LETMD1
NEDD1	NEDD1 Gamma-Tubulin Ring Complex Targeting Factor	Protein Coding	36	GC12P096907	0.786293	https://www.genecards.org/cgi-bin/carddisp.pl?gene=NEDD1
BAG6	BAG Cochaperone 6	Protein Coding	35	GC06M031639	0.786293	https://www.genecards.org/cgi-bin/carddisp.pl?gene=BAG6
TTI1	TELO2 Interacting Protein 1	Protein Coding	35	GC20M037983	0.786293	https://www.genecards.org/cgi-bin/carddisp.pl?gene=TTI1
B4GAT1	Beta-1,4-Glucuronyltransferase 1	Protein Coding	34	GC11M066345	0.786293	https://www.genecards.org/cgi-bin/carddisp.pl?gene=B4GAT1
INTS2	Integrator Complex Subunit 2	Protein Coding	34	GC17M061865	0.786293	https://www.genecards.org/cgi-bin/carddisp.pl?gene=INTS2
TMEM214	Transmembrane Protein 214	Protein Coding	34	GC02P027032	0.786293	https://www.genecards.org/cgi-bin/carddisp.pl?gene=TMEM214
TRAPPC5	Trafficking Protein Particle Complex Subunit 5	Protein Coding	34	GC19P007680	0.786293	https://www.genecards.org/cgi-bin/carddisp.pl?gene=TRAPPC5
STK11IP	Serine/Threonine Kinase 11 Interacting Protein	Protein Coding	34	GC02P219597	0.786293	https://www.genecards.org/cgi-bin/carddisp.pl?gene=STK11IP
ZFPL1	Zinc Finger Protein Like 1	Protein Coding	34	GC11P065084	0.786293	https://www.genecards.org/cgi-bin/carddisp.pl?gene=ZFPL1
YIF1B	Yip1 Interacting Factor Homolog B, Membrane Trafficking Protein	Protein Coding	34	GC19M038303	0.786293	https://www.genecards.org/cgi-bin/carddisp.pl?gene=YIF1B
BRI3BP	BRI3 Binding Protein	Protein Coding	33	GC12P124993	0.786293	https://www.genecards.org/cgi-bin/carddisp.pl?gene=BRI3BP
LTN1	Listerin E3 Ubiquitin Protein Ligase 1	Protein Coding	33	GC21M028928	0.786293	https://www.genecards.org/cgi-bin/carddisp.pl?gene=LTN1
TOR1AIP2	Torsin 1A Interacting Protein 2	Protein Coding	33	GC01M182319	0.786293	https://www.genecards.org/cgi-bin/carddisp.pl?gene=TOR1AIP2
GPAT4	Glycerol-3-Phosphate Acyltransferase 4	Protein Coding	32	GC08P041577	0.786293	https://www.genecards.org/cgi-bin/carddisp.pl?gene=GPAT4
TM9SF1	Transmembrane 9 Superfamily Member 1	Protein Coding	32	GC14M024189	0.786293	https://www.genecards.org/cgi-bin/carddisp.pl?gene=TM9SF1
EMC2	ER Membrane Protein Complex Subunit 2	Protein Coding	31	GC08P108443	0.786293	https://www.genecards.org/cgi-bin/carddisp.pl?gene=EMC2
DTWD2	DTW Domain Containing 2	Protein Coding	31	GC05M118836	0.786293	https://www.genecards.org/cgi-bin/carddisp.pl?gene=DTWD2
LMBRD2	LMBR1 Domain Containing 2	Protein Coding	31	GC05M036098	0.786293	https://www.genecards.org/cgi-bin/carddisp.pl?gene=LMBRD2
TTC27	Tetratricopeptide Repeat Domain 27	Protein Coding	31	GC02P032628	0.786293	https://www.genecards.org/cgi-bin/carddisp.pl?gene=TTC27
METTL16	Methyltransferase 16, N6-Methyladenosine	Protein Coding	29	GC17M002405	0.786293	https://www.genecards.org/cgi-bin/carddisp.pl?gene=METTL16
MACO1	Macoilin 1	Protein Coding	26	GC01P025430	0.786293	https://www.genecards.org/cgi-bin/carddisp.pl?gene=MACO1
ATR	ATR Serine/Threonine Kinase	Protein Coding	52	GC03M142449	0.779118	https://www.genecards.org/cgi-bin/carddisp.pl?gene=ATR
BLM	BLM RecQ Like Helicase	Protein Coding	48	GC15P090717	0.779118	https://www.genecards.org/cgi-bin/carddisp.pl?gene=BLM
HMOX2	Heme Oxygenase 2	Protein Coding	46	GC16P004474	0.779118	https://www.genecards.org/cgi-bin/carddisp.pl?gene=HMOX2
ATP2A3	ATPase Sarcoplasmic/Endoplasmic Reticulum Ca2+ Transporting 3	Protein Coding	45	GC17M003923	0.779118	https://www.genecards.org/cgi-bin/carddisp.pl?gene=ATP2A3
MTHFD1	Methylenetetrahydrofolate Dehydrogenase, Cyclohydrolase And Formyltetrahydrofolate Synthetase 1	Protein Coding	44	GC14P064388	0.779118	https://www.genecards.org/cgi-bin/carddisp.pl?gene=MTHFD1
CANX	Calnexin	Protein Coding	43	GC05P179678	0.779118	https://www.genecards.org/cgi-bin/carddisp.pl?gene=CANX
CLIP1	CAP-Gly Domain Containing Linker Protein 1	Protein Coding	43	GC12M122271	0.779118	https://www.genecards.org/cgi-bin/carddisp.pl?gene=CLIP1
PRKCSH	Protein Kinase C Substrate 80K-H	Protein Coding	43	GC19P011435	0.779118	https://www.genecards.org/cgi-bin/carddisp.pl?gene=PRKCSH
ARFGEF2	ADP Ribosylation Factor Guanine Nucleotide Exchange Factor 2	Protein Coding	41	GC20P048921	0.779118	https://www.genecards.org/cgi-bin/carddisp.pl?gene=ARFGEF2
BTAF1	B-TFIID TATA-Box Binding Protein Associated Factor 1	Protein Coding	41	GC10P091923	0.779118	https://www.genecards.org/cgi-bin/carddisp.pl?gene=BTAF1
CPD	Carboxypeptidase D	Protein Coding	41	GC17P030378	0.779118	https://www.genecards.org/cgi-bin/carddisp.pl?gene=CPD
HERC1	HECT And RLD Domain Containing E3 Ubiquitin Protein Ligase Family Member 1	Protein Coding	41	GC15M063608	0.779118	https://www.genecards.org/cgi-bin/carddisp.pl?gene=HERC1
PROCR	Protein C Receptor	Protein Coding	41	GC20P035273	0.779118	https://www.genecards.org/cgi-bin/carddisp.pl?gene=PROCR
XPO5	Exportin 5	Protein Coding	41	GC06M043522	0.779118	https://www.genecards.org/cgi-bin/carddisp.pl?gene=XPO5
DIS3	DIS3 Homolog, Exosome Endoribonuclease And 3'-5' Exoribonuclease	Protein Coding	40	GC13M072752	0.779118	https://www.genecards.org/cgi-bin/carddisp.pl?gene=DIS3
PHB2	Prohibitin 2	Protein Coding	40	GC12M006965	0.779118	https://www.genecards.org/cgi-bin/carddisp.pl?gene=PHB2
XPOT	Exportin For TRNA	Protein Coding	40	GC12P064404	0.779118	https://www.genecards.org/cgi-bin/carddisp.pl?gene=XPOT
ERLIN2	ER Lipid Raft Associated 2	Protein Coding	39	GC08P037736	0.779118	https://www.genecards.org/cgi-bin/carddisp.pl?gene=ERLIN2
HNRNPDL	Heterogeneous Nuclear Ribonucleoprotein D Like	Protein Coding	39	GC04M082422	0.779118	https://www.genecards.org/cgi-bin/carddisp.pl?gene=HNRNPDL
TBL2	Transducin Beta Like 2	Protein Coding	39	GC07M073568	0.779118	https://www.genecards.org/cgi-bin/carddisp.pl?gene=TBL2
DPY19L2	Dpy-19 Like 2	Protein Coding	38	GC12M063558	0.779118	https://www.genecards.org/cgi-bin/carddisp.pl?gene=DPY19L2
ATG9A	Autophagy Related 9A	Protein Coding	38	GC02M219219	0.779118	https://www.genecards.org/cgi-bin/carddisp.pl?gene=ATG9A
CXCL9	C-X-C Motif Chemokine Ligand 9	Protein Coding	38	GC04M076001	0.779118	https://www.genecards.org/cgi-bin/carddisp.pl?gene=CXCL9
GOLGA5	Golgin A5	Protein Coding	38	GC14P092794	0.779118	https://www.genecards.org/cgi-bin/carddisp.pl?gene=GOLGA5
RAB13	RAB13, Member RAS Oncogene Family	Protein Coding	38	GC01M153981	0.779118	https://www.genecards.org/cgi-bin/carddisp.pl?gene=RAB13
TIMELESS	Timeless Circadian Regulator	Protein Coding	38	GC12M056416	0.779118	https://www.genecards.org/cgi-bin/carddisp.pl?gene=TIMELESS
STOML2	Stomatin Like 2	Protein Coding	38	GC09M035099	0.779118	https://www.genecards.org/cgi-bin/carddisp.pl?gene=STOML2
CNNM3	Cyclin And CBS Domain Divalent Metal Cation Transport Mediator 3	Protein Coding	37	GC02P096815	0.779118	https://www.genecards.org/cgi-bin/carddisp.pl?gene=CNNM3
FAF2	Fas Associated Factor Family Member 2	Protein Coding	37	GC05P176447	0.779118	https://www.genecards.org/cgi-bin/carddisp.pl?gene=FAF2
RANBP6	RAN Binding Protein 6	Protein Coding	35	GC09M006002	0.779118	https://www.genecards.org/cgi-bin/carddisp.pl?gene=RANBP6
FOXK1	Forkhead Box K1	Protein Coding	34	GC07P004682	0.779118	https://www.genecards.org/cgi-bin/carddisp.pl?gene=FOXK1
TMUB1	Transmembrane And Ubiquitin Like Domain Containing 1	Protein Coding	33	GC07M151081	0.779118	https://www.genecards.org/cgi-bin/carddisp.pl?gene=TMUB1
CAVIN1	Caveolae Associated Protein 1	Protein Coding	32	GC17M042404	0.779118	https://www.genecards.org/cgi-bin/carddisp.pl?gene=CAVIN1
ATP5PD	ATP Synthase Peripheral Stalk Subunit D	Protein Coding	32	GC17M075039	0.779118	https://www.genecards.org/cgi-bin/carddisp.pl?gene=ATP5PD
SRPRA	SRP Receptor Subunit Alpha	Protein Coding	30	GC11M126255	0.779118	https://www.genecards.org/cgi-bin/carddisp.pl?gene=SRPRA
ATP5PB	ATP Synthase Peripheral Stalk-Membrane Subunit B	Protein Coding	29	GC01P111449	0.779118	https://www.genecards.org/cgi-bin/carddisp.pl?gene=ATP5PB
DNM2	Dynamin 2	Protein Coding	49	GC19P010718	0.736387	https://www.genecards.org/cgi-bin/carddisp.pl?gene=DNM2
PIKFYVE	Phosphoinositide Kinase, FYVE-Type Zinc Finger Containing	Protein Coding	47	GC02P208266	0.736387	https://www.genecards.org/cgi-bin/carddisp.pl?gene=PIKFYVE
CLCN7	Chloride Voltage-Gated Channel 7	Protein Coding	45	GC16M001444	0.736387	https://www.genecards.org/cgi-bin/carddisp.pl?gene=CLCN7
TGFBI	Transforming Growth Factor Beta Induced	Protein Coding	44	GC05P136027	0.736387	https://www.genecards.org/cgi-bin/carddisp.pl?gene=TGFBI
AVPR1B	Arginine Vasopressin Receptor 1B	Protein Coding	43	GC01M206109	0.736387	https://www.genecards.org/cgi-bin/carddisp.pl?gene=AVPR1B
BAG2	BAG Cochaperone 2	Protein Coding	39	GC06P057172	0.736387	https://www.genecards.org/cgi-bin/carddisp.pl?gene=BAG2
NETO2	Neuropilin And Tolloid Like 2	Protein Coding	38	GC16M047077	0.736387	https://www.genecards.org/cgi-bin/carddisp.pl?gene=NETO2
TPCN2	Two Pore Segment Channel 2	Protein Coding	38	GC11P069066	0.736387	https://www.genecards.org/cgi-bin/carddisp.pl?gene=TPCN2
ZC3HAV1	Zinc Finger CCCH-Type Containing, Antiviral 1	Protein Coding	37	GC07M139044	0.736387	https://www.genecards.org/cgi-bin/carddisp.pl?gene=ZC3HAV1
IFITM2	Interferon Induced Transmembrane Protein 2	Protein Coding	36	GC11P000300	0.736387	https://www.genecards.org/cgi-bin/carddisp.pl?gene=IFITM2
TMEM199	Transmembrane Protein 199	Protein Coding	33	GC17P031686	0.736387	https://www.genecards.org/cgi-bin/carddisp.pl?gene=TMEM199
GET4	Guided Entry Of Tail-Anchored Proteins Factor 4	Protein Coding	32	GC07P000876	0.736387	https://www.genecards.org/cgi-bin/carddisp.pl?gene=GET4
LY6E	Lymphocyte Antigen 6 Family Member E	Protein Coding	38	GC08P143017	0.727371	https://www.genecards.org/cgi-bin/carddisp.pl?gene=LY6E
NT5E	5'-Nucleotidase Ecto	Protein Coding	50	GC06P085449	0.71479	https://www.genecards.org/cgi-bin/carddisp.pl?gene=NT5E
ENTPD1	Ectonucleoside Triphosphate Diphosphohydrolase 1	Protein Coding	46	GC10P095711	0.71479	https://www.genecards.org/cgi-bin/carddisp.pl?gene=ENTPD1
CASP8	Caspase 8	Protein Coding	51	GC02P201233	0.677723	https://www.genecards.org/cgi-bin/carddisp.pl?gene=CASP8
FUCA1	Alpha-L-Fucosidase 1	Protein Coding	45	GC01M023845	0.677723	https://www.genecards.org/cgi-bin/carddisp.pl?gene=FUCA1
NEFL	Neurofilament Light Chain	Protein Coding	45	GC08M024950	0.677723	https://www.genecards.org/cgi-bin/carddisp.pl?gene=NEFL
TLL1	Tolloid Like 1	Protein Coding	42	GC04P165873	0.677723	https://www.genecards.org/cgi-bin/carddisp.pl?gene=TLL1
MKI67	Marker Of Proliferation Ki-67	Protein Coding	44	GC10M128096	0.671347	https://www.genecards.org/cgi-bin/carddisp.pl?gene=MKI67
FUT3	Fucosyltransferase 3 (Lewis Blood Group)	Protein Coding	42	GC19M005843	0.671347	https://www.genecards.org/cgi-bin/carddisp.pl?gene=FUT3
SPINT2	Serine Peptidase Inhibitor, Kunitz Type 2	Protein Coding	42	GC19P038244	0.671347	https://www.genecards.org/cgi-bin/carddisp.pl?gene=SPINT2
HLA-E	Major Histocompatibility Complex, Class I, E	Protein Coding	41	GC06P061145	0.671347	https://www.genecards.org/cgi-bin/carddisp.pl?gene=HLA-E
VMP1	Vacuole Membrane Protein 1	Protein Coding	36	GC17P059707	0.671347	https://www.genecards.org/cgi-bin/carddisp.pl?gene=VMP1
LOC102724971	Putative V-Set And Immunoglobulin Domain-Containing-Like Protein IGHV4OR15-8	Protein Coding	4	GC15M021742	0.671347	https://www.genecards.org/cgi-bin/carddisp.pl?gene=LOC102724971
SRPK1	SRSF Protein Kinase 1	Protein Coding	45	GC06M051558	0.63565	https://www.genecards.org/cgi-bin/carddisp.pl?gene=SRPK1
GC	GC Vitamin D Binding Protein	Protein Coding	42	GC04M071741	0.63565	https://www.genecards.org/cgi-bin/carddisp.pl?gene=GC
KPNA1	Karyopherin Subunit Alpha 1	Protein Coding	41	GC03M122421	0.63565	https://www.genecards.org/cgi-bin/carddisp.pl?gene=KPNA1
NTNG1	Netrin G1	Protein Coding	40	GC01P107140	0.63565	https://www.genecards.org/cgi-bin/carddisp.pl?gene=NTNG1
METTL3	Methyltransferase 3, N6-Adenosine-Methyltransferase Complex Catalytic Subunit	Protein Coding	39	GC14M021498	0.63565	https://www.genecards.org/cgi-bin/carddisp.pl?gene=METTL3
TTYH2	Tweety Family Member 2	Protein Coding	35	GC17P074215	0.63565	https://www.genecards.org/cgi-bin/carddisp.pl?gene=TTYH2
MIR4485	MicroRNA 4485	RNA Gene	13	GC11M010752	0.63565	https://www.genecards.org/cgi-bin/carddisp.pl?gene=MIR4485
CIITA	Class II Major Histocompatibility Complex Transactivator	Protein Coding	44	GC16P010879	0.629921	https://www.genecards.org/cgi-bin/carddisp.pl?gene=CIITA
EZH2	Enhancer Of Zeste 2 Polycomb Repressive Complex 2 Subunit	Protein Coding	53	GC07M148807	0.585743	https://www.genecards.org/cgi-bin/carddisp.pl?gene=EZH2
PSEN1	Presenilin 1	Protein Coding	51	GC14P073136	0.585743	https://www.genecards.org/cgi-bin/carddisp.pl?gene=PSEN1
CSNK2A1	Casein Kinase 2 Alpha 1	Protein Coding	50	GC20M000472	0.585743	https://www.genecards.org/cgi-bin/carddisp.pl?gene=CSNK2A1
SLC1A3	Solute Carrier Family 1 Member 3	Protein Coding	50	GC05P036626	0.585743	https://www.genecards.org/cgi-bin/carddisp.pl?gene=SLC1A3
PRKAR1A	Protein Kinase CAMP-Dependent Type I Regulatory Subunit Alpha	Protein Coding	50	GC17P068679	0.585743	https://www.genecards.org/cgi-bin/carddisp.pl?gene=PRKAR1A
CALR	Calreticulin	Protein Coding	49	GC19P012938	0.585743	https://www.genecards.org/cgi-bin/carddisp.pl?gene=CALR
MYH9	Myosin Heavy Chain 9	Protein Coding	49	GC22M036281	0.585743	https://www.genecards.org/cgi-bin/carddisp.pl?gene=MYH9
RAD50	RAD50 Double Strand Break Repair Protein	Protein Coding	49	GC05P132556	0.585743	https://www.genecards.org/cgi-bin/carddisp.pl?gene=RAD50
TPM1	Tropomyosin 1	Protein Coding	49	GC15P082198	0.585743	https://www.genecards.org/cgi-bin/carddisp.pl?gene=TPM1
CAPN1	Calpain 1	Protein Coding	48	GC11P065381	0.585743	https://www.genecards.org/cgi-bin/carddisp.pl?gene=CAPN1
ABCC1	ATP Binding Cassette Subfamily C Member 1	Protein Coding	48	GC16P015949	0.585743	https://www.genecards.org/cgi-bin/carddisp.pl?gene=ABCC1
GSN	Gelsolin	Protein Coding	48	GC09P121201	0.585743	https://www.genecards.org/cgi-bin/carddisp.pl?gene=GSN
MARK3	Microtubule Affinity Regulating Kinase 3	Protein Coding	48	GC14P103385	0.585743	https://www.genecards.org/cgi-bin/carddisp.pl?gene=MARK3
STK4	Serine/Threonine Kinase 4	Protein Coding	48	GC20P044966	0.585743	https://www.genecards.org/cgi-bin/carddisp.pl?gene=STK4
USP7	Ubiquitin Specific Peptidase 7	Protein Coding	48	GC16M008892	0.585743	https://www.genecards.org/cgi-bin/carddisp.pl?gene=USP7
ERCC3	ERCC Excision Repair 3, TFIIH Core Complex Helicase Subunit	Protein Coding	47	GC02M127257	0.585743	https://www.genecards.org/cgi-bin/carddisp.pl?gene=ERCC3
KEAP1	Kelch Like ECH Associated Protein 1	Protein Coding	47	GC19M010486	0.585743	https://www.genecards.org/cgi-bin/carddisp.pl?gene=KEAP1
TFRC	Transferrin Receptor	Protein Coding	47	GC03M196027	0.585743	https://www.genecards.org/cgi-bin/carddisp.pl?gene=TFRC
UBE3A	Ubiquitin Protein Ligase E3A	Protein Coding	47	GC15M025333	0.585743	https://www.genecards.org/cgi-bin/carddisp.pl?gene=UBE3A
ATP6V1B2	ATPase H+ Transporting V1 Subunit B2	Protein Coding	46	GC08P020197	0.585743	https://www.genecards.org/cgi-bin/carddisp.pl?gene=ATP6V1B2
HSD17B4	Hydroxysteroid 17-Beta Dehydrogenase 4	Protein Coding	46	GC05P119452	0.585743	https://www.genecards.org/cgi-bin/carddisp.pl?gene=HSD17B4
GATA6	GATA Binding Protein 6	Protein Coding	46	GC18P022169	0.585743	https://www.genecards.org/cgi-bin/carddisp.pl?gene=GATA6
TXNRD1	Thioredoxin Reductase 1	Protein Coding	46	GC12P104215	0.585743	https://www.genecards.org/cgi-bin/carddisp.pl?gene=TXNRD1
PPP2R1A	Protein Phosphatase 2 Scaffold Subunit Aalpha	Protein Coding	46	GC19P052189	0.585743	https://www.genecards.org/cgi-bin/carddisp.pl?gene=PPP2R1A
SUCLA2	Succinate-CoA Ligase ADP-Forming Subunit Beta	Protein Coding	46	GC13M047745	0.585743	https://www.genecards.org/cgi-bin/carddisp.pl?gene=SUCLA2
SMAD2	SMAD Family Member 2	Protein Coding	46	GC18M047809	0.585743	https://www.genecards.org/cgi-bin/carddisp.pl?gene=SMAD2
ZBTB16	Zinc Finger And BTB Domain Containing 16	Protein Coding	46	GC11P114059	0.585743	https://www.genecards.org/cgi-bin/carddisp.pl?gene=ZBTB16
FHL2	Four And A Half LIM Domains 2	Protein Coding	45	GC02M105357	0.585743	https://www.genecards.org/cgi-bin/carddisp.pl?gene=FHL2
LATS1	Large Tumor Suppressor Kinase 1	Protein Coding	45	GC06M149658	0.585743	https://www.genecards.org/cgi-bin/carddisp.pl?gene=LATS1
NME1	NME/NM23 Nucleoside Diphosphate Kinase 1	Protein Coding	45	GC17P051154	0.585743	https://www.genecards.org/cgi-bin/carddisp.pl?gene=NME1
NNT	Nicotinamide Nucleotide Transhydrogenase	Protein Coding	45	GC05P043807	0.585743	https://www.genecards.org/cgi-bin/carddisp.pl?gene=NNT
MYH14	Myosin Heavy Chain 14	Protein Coding	45	GC19P050220	0.585743	https://www.genecards.org/cgi-bin/carddisp.pl?gene=MYH14
MYO6	Myosin VI	Protein Coding	45	GC06P075749	0.585743	https://www.genecards.org/cgi-bin/carddisp.pl?gene=MYO6
PDK1	Pyruvate Dehydrogenase Kinase 1	Protein Coding	45	GC02P172555	0.585743	https://www.genecards.org/cgi-bin/carddisp.pl?gene=PDK1
TCF3	Transcription Factor 3	Protein Coding	45	GC19M001609	0.585743	https://www.genecards.org/cgi-bin/carddisp.pl?gene=TCF3
SLC27A4	Solute Carrier Family 27 Member 4	Protein Coding	45	GC09P128340	0.585743	https://www.genecards.org/cgi-bin/carddisp.pl?gene=SLC27A4
STK3	Serine/Threonine Kinase 3	Protein Coding	45	GC08M098372	0.585743	https://www.genecards.org/cgi-bin/carddisp.pl?gene=STK3
PLOD3	Procollagen-Lysine,2-Oxoglutarate 5-Dioxygenase 3	Protein Coding	45	GC07M101205	0.585743	https://www.genecards.org/cgi-bin/carddisp.pl?gene=PLOD3
C1QBP	Complement C1q Binding Protein	Protein Coding	44	GC17M005432	0.585743	https://www.genecards.org/cgi-bin/carddisp.pl?gene=C1QBP
ATP2B1	ATPase Plasma Membrane Ca2+ Transporting 1	Protein Coding	44	GC12M089588	0.585743	https://www.genecards.org/cgi-bin/carddisp.pl?gene=ATP2B1
ATP2C1	ATPase Secretory Pathway Ca2+ Transporting 1	Protein Coding	44	GC03P130850	0.585743	https://www.genecards.org/cgi-bin/carddisp.pl?gene=ATP2C1
HERC2	HECT And RLD Domain Containing E3 Ubiquitin Protein Ligase 2	Protein Coding	44	GC15M028111	0.585743	https://www.genecards.org/cgi-bin/carddisp.pl?gene=HERC2
PABPN1	Poly(A) Binding Protein Nuclear 1	Protein Coding	44	GC14P027749	0.585743	https://www.genecards.org/cgi-bin/carddisp.pl?gene=PABPN1
NKX2-5	NK2 Homeobox 5	Protein Coding	44	GC05M173232	0.585743	https://www.genecards.org/cgi-bin/carddisp.pl?gene=NKX2-5
MYO5A	Myosin VA	Protein Coding	44	GC15M071118	0.585743	https://www.genecards.org/cgi-bin/carddisp.pl?gene=MYO5A
MYO5B	Myosin VB	Protein Coding	44	GC18M049822	0.585743	https://www.genecards.org/cgi-bin/carddisp.pl?gene=MYO5B
PPM1A	Protein Phosphatase, Mg2+/Mn2+ Dependent 1A	Protein Coding	44	GC14P060245	0.585743	https://www.genecards.org/cgi-bin/carddisp.pl?gene=PPM1A
PEX1	Peroxisomal Biogenesis Factor 1	Protein Coding	44	GC07M092487	0.585743	https://www.genecards.org/cgi-bin/carddisp.pl?gene=PEX1
SAE1	SUMO1 Activating Enzyme Subunit 1	Protein Coding	44	GC19P047162	0.585743	https://www.genecards.org/cgi-bin/carddisp.pl?gene=SAE1
PLAA	Phospholipase A2 Activating Protein	Protein Coding	44	GC09M026903	0.585743	https://www.genecards.org/cgi-bin/carddisp.pl?gene=PLAA
PPP2R2A	Protein Phosphatase 2 Regulatory Subunit Balpha	Protein Coding	44	GC08P026292	0.585743	https://www.genecards.org/cgi-bin/carddisp.pl?gene=PPP2R2A
TFG	Trafficking From ER To Golgi Regulator	Protein Coding	44	GC03P100709	0.585743	https://www.genecards.org/cgi-bin/carddisp.pl?gene=TFG
ABCB7	ATP Binding Cassette Subfamily B Member 7	Protein Coding	43	GC0XM075053	0.585743	https://www.genecards.org/cgi-bin/carddisp.pl?gene=ABCB7
ATP6AP2	ATPase H+ Transporting Accessory Protein 2	Protein Coding	43	GC0XP040582	0.585743	https://www.genecards.org/cgi-bin/carddisp.pl?gene=ATP6AP2
NLRP12	NLR Family Pyrin Domain Containing 12	Protein Coding	43	GC19M053793	0.585743	https://www.genecards.org/cgi-bin/carddisp.pl?gene=NLRP12
MYO1E	Myosin IE	Protein Coding	43	GC15M059132	0.585743	https://www.genecards.org/cgi-bin/carddisp.pl?gene=MYO1E
PEX14	Peroxisomal Biogenesis Factor 14	Protein Coding	43	GC01P010472	0.585743	https://www.genecards.org/cgi-bin/carddisp.pl?gene=PEX14
PTPN13	Protein Tyrosine Phosphatase Non-Receptor Type 13	Protein Coding	43	GC04P086594	0.585743	https://www.genecards.org/cgi-bin/carddisp.pl?gene=PTPN13
TRIM32	Tripartite Motif Containing 32	Protein Coding	43	GC09P116687	0.585743	https://www.genecards.org/cgi-bin/carddisp.pl?gene=TRIM32
RNASEH1	Ribonuclease H1	Protein Coding	43	GC02M003544	0.585743	https://www.genecards.org/cgi-bin/carddisp.pl?gene=RNASEH1
DDB1	Damage Specific DNA Binding Protein 1	Protein Coding	42	GC11M074289	0.585743	https://www.genecards.org/cgi-bin/carddisp.pl?gene=DDB1
ACAD9	Acyl-CoA Dehydrogenase Family Member 9	Protein Coding	42	GC03P132077	0.585743	https://www.genecards.org/cgi-bin/carddisp.pl?gene=ACAD9
ACADL	Acyl-CoA Dehydrogenase Long Chain	Protein Coding	42	GC02M210187	0.585743	https://www.genecards.org/cgi-bin/carddisp.pl?gene=ACADL
AMFR	Autocrine Motility Factor Receptor	Protein Coding	42	GC16M056361	0.585743	https://www.genecards.org/cgi-bin/carddisp.pl?gene=AMFR
FOXC1	Forkhead Box C1	Protein Coding	42	GC06P001610	0.585743	https://www.genecards.org/cgi-bin/carddisp.pl?gene=FOXC1
GIPC1	GIPC PDZ Domain Containing Family Member 1	Protein Coding	42	GC19M014450	0.585743	https://www.genecards.org/cgi-bin/carddisp.pl?gene=GIPC1
EIF3F	Eukaryotic Translation Initiation Factor 3 Subunit F	Protein Coding	42	GC11P007966	0.585743	https://www.genecards.org/cgi-bin/carddisp.pl?gene=EIF3F
LGALS1	Galectin 1	Protein Coding	42	GC22P037675	0.585743	https://www.genecards.org/cgi-bin/carddisp.pl?gene=LGALS1
LAP3	Leucine Aminopeptidase 3	Protein Coding	42	GC04P017578	0.585743	https://www.genecards.org/cgi-bin/carddisp.pl?gene=LAP3
MTMR3	Myotubularin Related Protein 3	Protein Coding	42	GC22P029885	0.585743	https://www.genecards.org/cgi-bin/carddisp.pl?gene=MTMR3
KPNA3	Karyopherin Subunit Alpha 3	Protein Coding	42	GC13M049699	0.585743	https://www.genecards.org/cgi-bin/carddisp.pl?gene=KPNA3
PEX3	Peroxisomal Biogenesis Factor 3	Protein Coding	42	GC06P143450	0.585743	https://www.genecards.org/cgi-bin/carddisp.pl?gene=PEX3
PIGK	Phosphatidylinositol Glycan Anchor Biosynthesis Class K	Protein Coding	42	GC01M077088	0.585743	https://www.genecards.org/cgi-bin/carddisp.pl?gene=PIGK
PSMD9	Proteasome 26S Subunit, Non-ATPase 9	Protein Coding	42	GC12P124190	0.585743	https://www.genecards.org/cgi-bin/carddisp.pl?gene=PSMD9
TIMM8A	Translocase Of Inner Mitochondrial Membrane 8A	Protein Coding	42	GC0XM101345	0.585743	https://www.genecards.org/cgi-bin/carddisp.pl?gene=TIMM8A
TAB1	TGF-Beta Activated Kinase 1 (MAP3K7) Binding Protein 1	Protein Coding	42	GC22P039419	0.585743	https://www.genecards.org/cgi-bin/carddisp.pl?gene=TAB1
SLC31A1	Solute Carrier Family 31 Member 1	Protein Coding	42	GC09P113221	0.585743	https://www.genecards.org/cgi-bin/carddisp.pl?gene=SLC31A1
UBR5	Ubiquitin Protein Ligase E3 Component N-Recognin 5	Protein Coding	42	GC08M102252	0.585743	https://www.genecards.org/cgi-bin/carddisp.pl?gene=UBR5
TOLLIP	Toll Interacting Protein	Protein Coding	42	GC11M001274	0.585743	https://www.genecards.org/cgi-bin/carddisp.pl?gene=TOLLIP
DNA2	DNA Replication Helicase/Nuclease 2	Protein Coding	41	GC10M068414	0.585743	https://www.genecards.org/cgi-bin/carddisp.pl?gene=DNA2
AGK	Acylglycerol Kinase	Protein Coding	41	GC07P141551	0.585743	https://www.genecards.org/cgi-bin/carddisp.pl?gene=AGK
ALDH9A1	Aldehyde Dehydrogenase 9 Family Member A1	Protein Coding	41	GC01M165672	0.585743	https://www.genecards.org/cgi-bin/carddisp.pl?gene=ALDH9A1
ABHD12	Abhydrolase Domain Containing 12, Lysophospholipase	Protein Coding	41	GC20M025294	0.585743	https://www.genecards.org/cgi-bin/carddisp.pl?gene=ABHD12
CNNM2	Cyclin And CBS Domain Divalent Metal Cation Transport Mediator 2	Protein Coding	41	GC10P102918	0.585743	https://www.genecards.org/cgi-bin/carddisp.pl?gene=CNNM2
COMMD1	Copper Metabolism Domain Containing 1	Protein Coding	41	GC02P061888	0.585743	https://www.genecards.org/cgi-bin/carddisp.pl?gene=COMMD1
HDLBP	High Density Lipoprotein Binding Protein	Protein Coding	41	GC02M241227	0.585743	https://www.genecards.org/cgi-bin/carddisp.pl?gene=HDLBP
FLII	FLII Actin Remodeling Protein	Protein Coding	41	GC17M018244	0.585743	https://www.genecards.org/cgi-bin/carddisp.pl?gene=FLII
EIF3A	Eukaryotic Translation Initiation Factor 3 Subunit A	Protein Coding	41	GC10M119034	0.585743	https://www.genecards.org/cgi-bin/carddisp.pl?gene=EIF3A
KPNA4	Karyopherin Subunit Alpha 4	Protein Coding	41	GC03M160494	0.585743	https://www.genecards.org/cgi-bin/carddisp.pl?gene=KPNA4
OFD1	OFD1 Centriole And Centriolar Satellite Protein	Protein Coding	41	GC0XP013734	0.585743	https://www.genecards.org/cgi-bin/carddisp.pl?gene=OFD1
OLA1	Obg Like ATPase 1	Protein Coding	41	GC02M174072	0.585743	https://www.genecards.org/cgi-bin/carddisp.pl?gene=OLA1
MRE11	MRE11 Homolog, Double Strand Break Repair Nuclease	Protein Coding	41	GC11M095136	0.585743	https://www.genecards.org/cgi-bin/carddisp.pl?gene=MRE11
NME4	NME/NM23 Nucleoside Diphosphate Kinase 4	Protein Coding	41	GC16P000396	0.585743	https://www.genecards.org/cgi-bin/carddisp.pl?gene=NME4
MOCOS	Molybdenum Cofactor Sulfurase	Protein Coding	41	GC18P036187	0.585743	https://www.genecards.org/cgi-bin/carddisp.pl?gene=MOCOS
MARK1	Microtubule Affinity Regulating Kinase 1	Protein Coding	41	GC01P220528	0.585743	https://www.genecards.org/cgi-bin/carddisp.pl?gene=MARK1
RANBP9	RAN Binding Protein 9	Protein Coding	41	GC06M013621	0.585743	https://www.genecards.org/cgi-bin/carddisp.pl?gene=RANBP9
PEX19	Peroxisomal Biogenesis Factor 19	Protein Coding	41	GC01M160276	0.585743	https://www.genecards.org/cgi-bin/carddisp.pl?gene=PEX19
NAGLU	N-Acetyl-Alpha-Glucosaminidase	Protein Coding	41	GC17P042571	0.585743	https://www.genecards.org/cgi-bin/carddisp.pl?gene=NAGLU
PRKRA	Protein Activator Of Interferon Induced Protein Kinase EIF2AK2	Protein Coding	41	GC02M178431	0.585743	https://www.genecards.org/cgi-bin/carddisp.pl?gene=PRKRA
SIK3	SIK Family Kinase 3	Protein Coding	41	GC11M116843	0.585743	https://www.genecards.org/cgi-bin/carddisp.pl?gene=SIK3
TPP2	Tripeptidyl Peptidase 2	Protein Coding	41	GC13P102596	0.585743	https://www.genecards.org/cgi-bin/carddisp.pl?gene=TPP2
TRAF7	TNF Receptor Associated Factor 7	Protein Coding	41	GC16P006819	0.585743	https://www.genecards.org/cgi-bin/carddisp.pl?gene=TRAF7
SND1	Staphylococcal Nuclease And Tudor Domain Containing 1	Protein Coding	41	GC07P127652	0.585743	https://www.genecards.org/cgi-bin/carddisp.pl?gene=SND1
USP25	Ubiquitin Specific Peptidase 25	Protein Coding	41	GC21P015730	0.585743	https://www.genecards.org/cgi-bin/carddisp.pl?gene=USP25
XPNPEP3	X-Prolyl Aminopeptidase 3	Protein Coding	41	GC22P040857	0.585743	https://www.genecards.org/cgi-bin/carddisp.pl?gene=XPNPEP3
DAP3	Death Associated Protein 3	Protein Coding	40	GC01P155690	0.585743	https://www.genecards.org/cgi-bin/carddisp.pl?gene=DAP3
DYNC1I2	Dynein Cytoplasmic 1 Intermediate Chain 2	Protein Coding	40	GC02P171687	0.585743	https://www.genecards.org/cgi-bin/carddisp.pl?gene=DYNC1I2
ABLIM1	Actin Binding LIM Protein 1	Protein Coding	40	GC10M114469	0.585743	https://www.genecards.org/cgi-bin/carddisp.pl?gene=ABLIM1
CEP290	Centrosomal Protein 290	Protein Coding	40	GC12M088049	0.585743	https://www.genecards.org/cgi-bin/carddisp.pl?gene=CEP290
CEP55	Centrosomal Protein 55	Protein Coding	40	GC10P093496	0.585743	https://www.genecards.org/cgi-bin/carddisp.pl?gene=CEP55
ASCC1	Activating Signal Cointegrator 1 Complex Subunit 1	Protein Coding	40	GC10M072096	0.585743	https://www.genecards.org/cgi-bin/carddisp.pl?gene=ASCC1
ATAD1	ATPase Family AAA Domain Containing 1	Protein Coding	40	GC10M087751	0.585743	https://www.genecards.org/cgi-bin/carddisp.pl?gene=ATAD1
FLVCR1	FLVCR Heme Transporter 1	Protein Coding	40	GC01P212858	0.585743	https://www.genecards.org/cgi-bin/carddisp.pl?gene=FLVCR1
GTSE1	G2 And S-Phase Expressed 1	Protein Coding	40	GC22P046296	0.585743	https://www.genecards.org/cgi-bin/carddisp.pl?gene=GTSE1
FHL3	Four And A Half LIM Domains 3	Protein Coding	40	GC01M037999	0.585743	https://www.genecards.org/cgi-bin/carddisp.pl?gene=FHL3
EIF3H	Eukaryotic Translation Initiation Factor 3 Subunit H	Protein Coding	40	GC08M116642	0.585743	https://www.genecards.org/cgi-bin/carddisp.pl?gene=EIF3H
P4HA1	Prolyl 4-Hydroxylase Subunit Alpha 1	Protein Coding	40	GC10M073007	0.585743	https://www.genecards.org/cgi-bin/carddisp.pl?gene=P4HA1
MRPS28	Mitochondrial Ribosomal Protein S28	Protein Coding	40	GC08M079929	0.585743	https://www.genecards.org/cgi-bin/carddisp.pl?gene=MRPS28
NUP153	Nucleoporin 153	Protein Coding	40	GC06M017615	0.585743	https://www.genecards.org/cgi-bin/carddisp.pl?gene=NUP153
TPM4	Tropomyosin 4	Protein Coding	40	GC19P028985	0.585743	https://www.genecards.org/cgi-bin/carddisp.pl?gene=TPM4
WDR26	WD Repeat Domain 26	Protein Coding	40	GC01M224385	0.585743	https://www.genecards.org/cgi-bin/carddisp.pl?gene=WDR26
DNPEP	Aspartyl Aminopeptidase	Protein Coding	39	GC02M219373	0.585743	https://www.genecards.org/cgi-bin/carddisp.pl?gene=DNPEP
CEP170	Centrosomal Protein 170	Protein Coding	39	GC01M243124	0.585743	https://www.genecards.org/cgi-bin/carddisp.pl?gene=CEP170
CDS2	CDP-Diacylglycerol Synthase 2	Protein Coding	39	GC20P005126	0.585743	https://www.genecards.org/cgi-bin/carddisp.pl?gene=CDS2
GSPT1	G1 To S Phase Transition 1	Protein Coding	39	GC16M011868	0.585743	https://www.genecards.org/cgi-bin/carddisp.pl?gene=GSPT1
MRPL15	Mitochondrial Ribosomal Protein L15	Protein Coding	39	GC08P054135	0.585743	https://www.genecards.org/cgi-bin/carddisp.pl?gene=MRPL15
PPFIBP1	PPFIA Binding Protein 1	Protein Coding	39	GC12P027523	0.585743	https://www.genecards.org/cgi-bin/carddisp.pl?gene=PPFIBP1
PIGG	Phosphatidylinositol Glycan Anchor Biosynthesis Class G	Protein Coding	39	GC04P000607	0.585743	https://www.genecards.org/cgi-bin/carddisp.pl?gene=PIGG
RTKN	Rhotekin	Protein Coding	39	GC02M074726	0.585743	https://www.genecards.org/cgi-bin/carddisp.pl?gene=RTKN
SLC39A10	Solute Carrier Family 39 Member 10	Protein Coding	39	GC02P195575	0.585743	https://www.genecards.org/cgi-bin/carddisp.pl?gene=SLC39A10
SLC39A6	Solute Carrier Family 39 Member 6	Protein Coding	39	GC18M036108	0.585743	https://www.genecards.org/cgi-bin/carddisp.pl?gene=SLC39A6
TNPO3	Transportin 3	Protein Coding	39	GC07M128954	0.585743	https://www.genecards.org/cgi-bin/carddisp.pl?gene=TNPO3
TELO2	Telomere Maintenance 2	Protein Coding	39	GC16P001493	0.585743	https://www.genecards.org/cgi-bin/carddisp.pl?gene=TELO2
RCBTB1	RCC1 And BTB Domain Containing Protein 1	Protein Coding	39	GC13M049531	0.585743	https://www.genecards.org/cgi-bin/carddisp.pl?gene=RCBTB1
NDUFAF3	NADH:Ubiquinone Oxidoreductase Complex Assembly Factor 3	Protein Coding	39	GC03P049020	0.585743	https://www.genecards.org/cgi-bin/carddisp.pl?gene=NDUFAF3
USP28	Ubiquitin Specific Peptidase 28	Protein Coding	39	GC11M113797	0.585743	https://www.genecards.org/cgi-bin/carddisp.pl?gene=USP28
DCP1A	Decapping MRNA 1A	Protein Coding	38	GC03M053301	0.585743	https://www.genecards.org/cgi-bin/carddisp.pl?gene=DCP1A
ECSIT	ECSIT Signaling Integrator	Protein Coding	38	GC19M011505	0.585743	https://www.genecards.org/cgi-bin/carddisp.pl?gene=ECSIT
DYM	Dymeclin	Protein Coding	38	GC18M049041	0.585743	https://www.genecards.org/cgi-bin/carddisp.pl?gene=DYM
DNAJB9	DnaJ Heat Shock Protein Family (Hsp40) Member B9	Protein Coding	38	GC07P108569	0.585743	https://www.genecards.org/cgi-bin/carddisp.pl?gene=DNAJB9
BMS1	BMS1 Ribosome Biogenesis Factor	Protein Coding	38	GC10P042782	0.585743	https://www.genecards.org/cgi-bin/carddisp.pl?gene=BMS1
CETN3	Centrin 3	Protein Coding	38	GC05M090392	0.585743	https://www.genecards.org/cgi-bin/carddisp.pl?gene=CETN3
DIS3L	DIS3 Like Exosome 3'-5' Exoribonuclease	Protein Coding	38	GC15P066293	0.585743	https://www.genecards.org/cgi-bin/carddisp.pl?gene=DIS3L
EIF3B	Eukaryotic Translation Initiation Factor 3 Subunit B	Protein Coding	38	GC07P002354	0.585743	https://www.genecards.org/cgi-bin/carddisp.pl?gene=EIF3B
EIF3L	Eukaryotic Translation Initiation Factor 3 Subunit L	Protein Coding	38	GC22P037848	0.585743	https://www.genecards.org/cgi-bin/carddisp.pl?gene=EIF3L
KANK2	KN Motif And Ankyrin Repeat Domains 2	Protein Coding	38	GC19M011165	0.585743	https://www.genecards.org/cgi-bin/carddisp.pl?gene=KANK2
IBTK	Inhibitor Of Bruton Tyrosine Kinase	Protein Coding	38	GC06M082169	0.585743	https://www.genecards.org/cgi-bin/carddisp.pl?gene=IBTK
EIF3D	Eukaryotic Translation Initiation Factor 3 Subunit D	Protein Coding	38	GC22M036510	0.585743	https://www.genecards.org/cgi-bin/carddisp.pl?gene=EIF3D
EIF3E	Eukaryotic Translation Initiation Factor 3 Subunit E	Protein Coding	38	GC08M108163	0.585743	https://www.genecards.org/cgi-bin/carddisp.pl?gene=EIF3E
EIF3I	Eukaryotic Translation Initiation Factor 3 Subunit I	Protein Coding	38	GC01P032221	0.585743	https://www.genecards.org/cgi-bin/carddisp.pl?gene=EIF3I
EIF3J	Eukaryotic Translation Initiation Factor 3 Subunit J	Protein Coding	38	GC15P044537	0.585743	https://www.genecards.org/cgi-bin/carddisp.pl?gene=EIF3J
KPNA5	Karyopherin Subunit Alpha 5	Protein Coding	38	GC06P116681	0.585743	https://www.genecards.org/cgi-bin/carddisp.pl?gene=KPNA5
KPNA6	Karyopherin Subunit Alpha 6	Protein Coding	38	GC01P032108	0.585743	https://www.genecards.org/cgi-bin/carddisp.pl?gene=KPNA6
NSFL1C	NSFL1 Cofactor	Protein Coding	38	GC20M001442	0.585743	https://www.genecards.org/cgi-bin/carddisp.pl?gene=NSFL1C
NVL	Nuclear VCP Like	Protein Coding	38	GC01M224227	0.585743	https://www.genecards.org/cgi-bin/carddisp.pl?gene=NVL
MRPS9	Mitochondrial Ribosomal Protein S9	Protein Coding	38	GC02P105020	0.585743	https://www.genecards.org/cgi-bin/carddisp.pl?gene=MRPS9
LPGAT1	Lysophosphatidylglycerol Acyltransferase 1	Protein Coding	38	GC01M211743	0.585743	https://www.genecards.org/cgi-bin/carddisp.pl?gene=LPGAT1
LRRFIP2	LRR Binding FLII Interacting Protein 2	Protein Coding	38	GC03M037052	0.585743	https://www.genecards.org/cgi-bin/carddisp.pl?gene=LRRFIP2
LSM3	LSM3 Homolog, U6 Small Nuclear RNA And MRNA Degradation Associated	Protein Coding	38	GC03P014180	0.585743	https://www.genecards.org/cgi-bin/carddisp.pl?gene=LSM3
MYL6B	Myosin Light Chain 6B	Protein Coding	38	GC12P056685	0.585743	https://www.genecards.org/cgi-bin/carddisp.pl?gene=MYL6B
RALGAPA1	Ral GTPase Activating Protein Catalytic Subunit Alpha 1	Protein Coding	38	GC14M035538	0.585743	https://www.genecards.org/cgi-bin/carddisp.pl?gene=RALGAPA1
RBMS1	RNA Binding Motif Single Stranded Interacting Protein 1	Protein Coding	38	GC02M160272	0.585743	https://www.genecards.org/cgi-bin/carddisp.pl?gene=RBMS1
POP4	POP4 Homolog, Ribonuclease P/MRP Subunit	Protein Coding	38	GC19P029886	0.585743	https://www.genecards.org/cgi-bin/carddisp.pl?gene=POP4
NUP50	Nucleoporin 50	Protein Coding	38	GC22P045163	0.585743	https://www.genecards.org/cgi-bin/carddisp.pl?gene=NUP50
MTIF2	Mitochondrial Translational Initiation Factor 2	Protein Coding	38	GC02M055236	0.585743	https://www.genecards.org/cgi-bin/carddisp.pl?gene=MTIF2
TCF25	Transcription Factor 25	Protein Coding	38	GC16P089873	0.585743	https://www.genecards.org/cgi-bin/carddisp.pl?gene=TCF25
TMEM106B	Transmembrane Protein 106B	Protein Coding	38	GC07P012220	0.585743	https://www.genecards.org/cgi-bin/carddisp.pl?gene=TMEM106B
TBL3	Transducin Beta Like 3	Protein Coding	38	GC16P006804	0.585743	https://www.genecards.org/cgi-bin/carddisp.pl?gene=TBL3
SAV1	Salvador Family WW Domain Containing Protein 1	Protein Coding	38	GC14M050632	0.585743	https://www.genecards.org/cgi-bin/carddisp.pl?gene=SAV1
RDH13	Retinol Dehydrogenase 13	Protein Coding	38	GC19M055039	0.585743	https://www.genecards.org/cgi-bin/carddisp.pl?gene=RDH13
RSL1D1	Ribosomal L1 Domain Containing 1	Protein Coding	38	GC16M011833	0.585743	https://www.genecards.org/cgi-bin/carddisp.pl?gene=RSL1D1
RRP7A	Ribosomal RNA Processing 7 Homolog A	Protein Coding	38	GC22M042508	0.585743	https://www.genecards.org/cgi-bin/carddisp.pl?gene=RRP7A
PPP1R7	Protein Phosphatase 1 Regulatory Subunit 7	Protein Coding	38	GC02P241150	0.585743	https://www.genecards.org/cgi-bin/carddisp.pl?gene=PPP1R7
STRN3	Striatin 3	Protein Coding	38	GC14M030893	0.585743	https://www.genecards.org/cgi-bin/carddisp.pl?gene=STRN3
WDR36	WD Repeat Domain 36	Protein Coding	38	GC05P111091	0.585743	https://www.genecards.org/cgi-bin/carddisp.pl?gene=WDR36
USP33	Ubiquitin Specific Peptidase 33	Protein Coding	38	GC01M077695	0.585743	https://www.genecards.org/cgi-bin/carddisp.pl?gene=USP33
TGS1	Trimethylguanosine Synthase 1	Protein Coding	38	GC08P055773	0.585743	https://www.genecards.org/cgi-bin/carddisp.pl?gene=TGS1
YBX3	Y-Box Binding Protein 3	Protein Coding	38	GC12M016946	0.585743	https://www.genecards.org/cgi-bin/carddisp.pl?gene=YBX3
WDR12	WD Repeat Domain 12	Protein Coding	38	GC02M202874	0.585743	https://www.genecards.org/cgi-bin/carddisp.pl?gene=WDR12
DHX37	DEAH-Box Helicase 37	Protein Coding	37	GC12M124946	0.585743	https://www.genecards.org/cgi-bin/carddisp.pl?gene=DHX37
BRAT1	BRCA1 Associated ATM Activator 1	Protein Coding	37	GC07M002655	0.585743	https://www.genecards.org/cgi-bin/carddisp.pl?gene=BRAT1
CBX8	Chromobox 8	Protein Coding	37	GC17M079794	0.585743	https://www.genecards.org/cgi-bin/carddisp.pl?gene=CBX8
CCAR1	Cell Division Cycle And Apoptosis Regulator 1	Protein Coding	37	GC10P068721	0.585743	https://www.genecards.org/cgi-bin/carddisp.pl?gene=CCAR1
ACOT8	Acyl-CoA Thioesterase 8	Protein Coding	37	GC20M045841	0.585743	https://www.genecards.org/cgi-bin/carddisp.pl?gene=ACOT8
ACOT9	Acyl-CoA Thioesterase 9	Protein Coding	37	GC0XM023701	0.585743	https://www.genecards.org/cgi-bin/carddisp.pl?gene=ACOT9
COX7C	Cytochrome C Oxidase Subunit 7C	Protein Coding	37	GC05P086617	0.585743	https://www.genecards.org/cgi-bin/carddisp.pl?gene=COX7C
CPSF3	Cleavage And Polyadenylation Specific Factor 3	Protein Coding	37	GC02P009423	0.585743	https://www.genecards.org/cgi-bin/carddisp.pl?gene=CPSF3
ATL3	Atlastin GTPase 3	Protein Coding	37	GC11M063624	0.585743	https://www.genecards.org/cgi-bin/carddisp.pl?gene=ATL3
GPRASP2	G Protein-Coupled Receptor Associated Sorting Protein 2	Protein Coding	37	GC0XP102712	0.585743	https://www.genecards.org/cgi-bin/carddisp.pl?gene=GPRASP2
CREG1	Cellular Repressor Of E1A Stimulated Genes 1	Protein Coding	37	GC01M167498	0.585743	https://www.genecards.org/cgi-bin/carddisp.pl?gene=CREG1
HEATR1	HEAT Repeat Containing 1	Protein Coding	37	GC01M236549	0.585743	https://www.genecards.org/cgi-bin/carddisp.pl?gene=HEATR1
EIF3C	Eukaryotic Translation Initiation Factor 3 Subunit C	Protein Coding	37	GC16P034250	0.585743	https://www.genecards.org/cgi-bin/carddisp.pl?gene=EIF3C
EIF3K	Eukaryotic Translation Initiation Factor 3 Subunit K	Protein Coding	37	GC19P038619	0.585743	https://www.genecards.org/cgi-bin/carddisp.pl?gene=EIF3K
FTSJ3	FtsJ RNA 2'-O-Methyltransferase 3	Protein Coding	37	GC17M063819	0.585743	https://www.genecards.org/cgi-bin/carddisp.pl?gene=FTSJ3
IPO7	Importin 7	Protein Coding	37	GC11P009384	0.585743	https://www.genecards.org/cgi-bin/carddisp.pl?gene=IPO7
HYLS1	HYLS1 Centriolar And Ciliogenesis Associated	Protein Coding	37	GC11P125883	0.585743	https://www.genecards.org/cgi-bin/carddisp.pl?gene=HYLS1
EXOSC1	Exosome Component 1	Protein Coding	37	GC10M097435	0.585743	https://www.genecards.org/cgi-bin/carddisp.pl?gene=EXOSC1
EIF3G	Eukaryotic Translation Initiation Factor 3 Subunit G	Protein Coding	37	GC19M010115	0.585743	https://www.genecards.org/cgi-bin/carddisp.pl?gene=EIF3G
EIF3M	Eukaryotic Translation Initiation Factor 3 Subunit M	Protein Coding	37	GC11P032564	0.585743	https://www.genecards.org/cgi-bin/carddisp.pl?gene=EIF3M
MRPL11	Mitochondrial Ribosomal Protein L11	Protein Coding	37	GC11M074590	0.585743	https://www.genecards.org/cgi-bin/carddisp.pl?gene=MRPL11
MAN2B2	Mannosidase Alpha Class 2B Member 2	Protein Coding	37	GC04P006575	0.585743	https://www.genecards.org/cgi-bin/carddisp.pl?gene=MAN2B2
MAEA	Macrophage Erythroblast Attacher, E3 Ubiquitin Ligase	Protein Coding	37	GC04P001289	0.585743	https://www.genecards.org/cgi-bin/carddisp.pl?gene=MAEA
TBC1D24	TBC1 Domain Family Member 24	Protein Coding	37	GC16P002475	0.585743	https://www.genecards.org/cgi-bin/carddisp.pl?gene=TBC1D24
STXBP4	Syntaxin Binding Protein 4	Protein Coding	37	GC17P054968	0.585743	https://www.genecards.org/cgi-bin/carddisp.pl?gene=STXBP4
TMOD1	Tropomodulin 1	Protein Coding	37	GC09P097501	0.585743	https://www.genecards.org/cgi-bin/carddisp.pl?gene=TMOD1
SEMA4F	Ssemaphorin 4F	Protein Coding	37	GC02P074654	0.585743	https://www.genecards.org/cgi-bin/carddisp.pl?gene=SEMA4F
TNRC6B	Trinucleotide Repeat Containing Adaptor 6B	Protein Coding	37	GC22P040044	0.585743	https://www.genecards.org/cgi-bin/carddisp.pl?gene=TNRC6B
TOM1L2	Target Of Myb1 Like 2 Membrane Trafficking Protein	Protein Coding	37	GC17M017843	0.585743	https://www.genecards.org/cgi-bin/carddisp.pl?gene=TOM1L2
QTRT1	Queuine TRNA-Ribosyltransferase Catalytic Subunit 1	Protein Coding	37	GC19P010701	0.585743	https://www.genecards.org/cgi-bin/carddisp.pl?gene=QTRT1
WDR11	WD Repeat Domain 11	Protein Coding	37	GC10P120851	0.585743	https://www.genecards.org/cgi-bin/carddisp.pl?gene=WDR11
NENF	Neudesin Neurotrophic Factor	Protein Coding	37	GC01P212432	0.585743	https://www.genecards.org/cgi-bin/carddisp.pl?gene=NENF
WLS	Wnt Ligand Secretion Mediator	Protein Coding	37	GC01M068098	0.585743	https://www.genecards.org/cgi-bin/carddisp.pl?gene=WLS
EBNA1BP2	EBNA1 Binding Protein 2	Protein Coding	36	GC01M043165	0.585743	https://www.genecards.org/cgi-bin/carddisp.pl?gene=EBNA1BP2
DNAJC1	DnaJ Heat Shock Protein Family (Hsp40) Member C1	Protein Coding	36	GC10M021762	0.585743	https://www.genecards.org/cgi-bin/carddisp.pl?gene=DNAJC1
CEBPZ	CCAAT Enhancer Binding Protein Zeta	Protein Coding	36	GC02M037201	0.585743	https://www.genecards.org/cgi-bin/carddisp.pl?gene=CEBPZ
CEP72	Centrosomal Protein 72	Protein Coding	36	GC05P000612	0.585743	https://www.genecards.org/cgi-bin/carddisp.pl?gene=CEP72
APPBP2	Amyloid Beta Precursor Protein Binding Protein 2	Protein Coding	36	GC17M060443	0.585743	https://www.genecards.org/cgi-bin/carddisp.pl?gene=APPBP2
ATAD3B	ATPase Family AAA Domain Containing 3B	Protein Coding	36	GC01P002507	0.585743	https://www.genecards.org/cgi-bin/carddisp.pl?gene=ATAD3B
CCP110	Centriolar Coiled-Coil Protein 110	Protein Coding	36	GC16P019536	0.585743	https://www.genecards.org/cgi-bin/carddisp.pl?gene=CCP110
COPG1	COPI Coat Complex Subunit Gamma 1	Protein Coding	36	GC03P129249	0.585743	https://www.genecards.org/cgi-bin/carddisp.pl?gene=COPG1
GDPD1	Glycerophosphodiester Phosphodiesterase Domain Containing 1	Protein Coding	36	GC17P059220	0.585743	https://www.genecards.org/cgi-bin/carddisp.pl?gene=GDPD1
GNL2	G Protein Nucleolar 2	Protein Coding	36	GC01M037566	0.585743	https://www.genecards.org/cgi-bin/carddisp.pl?gene=GNL2
GARS1	Glycyl-TRNA Synthetase 1	Protein Coding	36	GC07P030580	0.585743	https://www.genecards.org/cgi-bin/carddisp.pl?gene=GARS1
IPO8	Importin 8	Protein Coding	36	GC12M030628	0.585743	https://www.genecards.org/cgi-bin/carddisp.pl?gene=IPO8
PAM16	Presequence Translocase Associated Motor 16	Protein Coding	36	GC16M004343	0.585743	https://www.genecards.org/cgi-bin/carddisp.pl?gene=PAM16
MRPS31	Mitochondrial Ribosomal Protein S31	Protein Coding	36	GC13M040729	0.585743	https://www.genecards.org/cgi-bin/carddisp.pl?gene=MRPS31
MRPL43	Mitochondrial Ribosomal Protein L43	Protein Coding	36	GC10M100969	0.585743	https://www.genecards.org/cgi-bin/carddisp.pl?gene=MRPL43
MRPS24	Mitochondrial Ribosomal Protein S24	Protein Coding	36	GC07M043868	0.585743	https://www.genecards.org/cgi-bin/carddisp.pl?gene=MRPS24
MAP7	Microtubule Associated Protein 7	Protein Coding	36	GC06M136342	0.585743	https://www.genecards.org/cgi-bin/carddisp.pl?gene=MAP7
RBMS2	RNA Binding Motif Single Stranded Interacting Protein 2	Protein Coding	36	GC12P056737	0.585743	https://www.genecards.org/cgi-bin/carddisp.pl?gene=RBMS2
RANBP10	RAN Binding Protein 10	Protein Coding	36	GC16M067723	0.585743	https://www.genecards.org/cgi-bin/carddisp.pl?gene=RANBP10
PWP2	PWP2 Small Subunit Processome Component	Protein Coding	36	GC21P044107	0.585743	https://www.genecards.org/cgi-bin/carddisp.pl?gene=PWP2
TMBIM6	Transmembrane BAX Inhibitor Motif Containing 6	Protein Coding	36	GC12P049707	0.585743	https://www.genecards.org/cgi-bin/carddisp.pl?gene=TMBIM6
UACA	Uveal Autoantigen With Coiled-Coil Domains And Ankyrin Repeats	Protein Coding	36	GC15M070654	0.585743	https://www.genecards.org/cgi-bin/carddisp.pl?gene=UACA
TNPO2	Transportin 2	Protein Coding	36	GC19M012699	0.585743	https://www.genecards.org/cgi-bin/carddisp.pl?gene=TNPO2
SSX2IP	SSX Family Member 2 Interacting Protein	Protein Coding	36	GC01M084643	0.585743	https://www.genecards.org/cgi-bin/carddisp.pl?gene=SSX2IP
PCYOX1	Prenylcysteine Oxidase 1	Protein Coding	36	GC02P070257	0.585743	https://www.genecards.org/cgi-bin/carddisp.pl?gene=PCYOX1
RMND5A	Required For Meiotic Nuclear Division 5 Homolog A	Protein Coding	36	GC02P086721	0.585743	https://www.genecards.org/cgi-bin/carddisp.pl?gene=RMND5A
NOL8	Nucleolar Protein 8	Protein Coding	36	GC09M092297	0.585743	https://www.genecards.org/cgi-bin/carddisp.pl?gene=NOL8
YPEL5	Yippee Like 5	Protein Coding	36	GC02P030108	0.585743	https://www.genecards.org/cgi-bin/carddisp.pl?gene=YPEL5
WDR59	WD Repeat Domain 59	Protein Coding	36	GC16M074871	0.585743	https://www.genecards.org/cgi-bin/carddisp.pl?gene=WDR59
ZWINT	ZW10 Interacting Kinetochore Protein	Protein Coding	36	GC10M056357	0.585743	https://www.genecards.org/cgi-bin/carddisp.pl?gene=ZWINT
CHORDC1	Cysteine And Histidine Rich Domain Containing 1	Protein Coding	35	GC11M090200	0.585743	https://www.genecards.org/cgi-bin/carddisp.pl?gene=CHORDC1
DDX27	DEAD-Box Helicase 27	Protein Coding	35	GC20P049219	0.585743	https://www.genecards.org/cgi-bin/carddisp.pl?gene=DDX27
INTS7	Integrator Complex Subunit 7	Protein Coding	35	GC01M211940	0.585743	https://www.genecards.org/cgi-bin/carddisp.pl?gene=INTS7
JRK	Jrk Helix-Turn-Helix Protein	Protein Coding	35	GC08M142657	0.585743	https://www.genecards.org/cgi-bin/carddisp.pl?gene=JRK
LIMCH1	LIM And Calponin Homology Domains 1	Protein Coding	35	GC04P041362	0.585743	https://www.genecards.org/cgi-bin/carddisp.pl?gene=LIMCH1
NCLN	Nicalin	Protein Coding	35	GC19P003185	0.585743	https://www.genecards.org/cgi-bin/carddisp.pl?gene=NCLN
MPHOSPH6	M-Phase Phosphoprotein 6	Protein Coding	35	GC16M082181	0.585743	https://www.genecards.org/cgi-bin/carddisp.pl?gene=MPHOSPH6
POLDIP2	DNA Polymerase Delta Interacting Protein 2	Protein Coding	35	GC17M028346	0.585743	https://www.genecards.org/cgi-bin/carddisp.pl?gene=POLDIP2
SURF6	Surfeit 6	Protein Coding	35	GC09M133331	0.585743	https://www.genecards.org/cgi-bin/carddisp.pl?gene=SURF6
TNRC6C	Trinucleotide Repeat Containing Adaptor 6C	Protein Coding	35	GC17P077959	0.585743	https://www.genecards.org/cgi-bin/carddisp.pl?gene=TNRC6C
TRIM3	Tripartite Motif Containing 3	Protein Coding	35	GC11M006450	0.585743	https://www.genecards.org/cgi-bin/carddisp.pl?gene=TRIM3
RBPMS2	RNA Binding Protein, MRNA Processing Factor 2	Protein Coding	35	GC15M064739	0.585743	https://www.genecards.org/cgi-bin/carddisp.pl?gene=RBPMS2
NOL6	Nucleolar Protein 6	Protein Coding	35	GC09M033451	0.585743	https://www.genecards.org/cgi-bin/carddisp.pl?gene=NOL6
YTHDC2	YTH Domain Containing 2	Protein Coding	35	GC05P113513	0.585743	https://www.genecards.org/cgi-bin/carddisp.pl?gene=YTHDC2
ZNF346	Zinc Finger Protein 346	Protein Coding	35	GC05P177022	0.585743	https://www.genecards.org/cgi-bin/carddisp.pl?gene=ZNF346
BZW1	Basic Leucine Zipper And W2 Domains 1	Protein Coding	34	GC02P200810	0.585743	https://www.genecards.org/cgi-bin/carddisp.pl?gene=BZW1
CMTR1	Cap Methyltransferase 1	Protein Coding	34	GC06P061328	0.585743	https://www.genecards.org/cgi-bin/carddisp.pl?gene=CMTR1
CEP85L	Centrosomal Protein 85 Like	Protein Coding	34	GC06M118460	0.585743	https://www.genecards.org/cgi-bin/carddisp.pl?gene=CEP85L
ASCC2	Activating Signal Cointegrator 1 Complex Subunit 2	Protein Coding	34	GC22M029788	0.585743	https://www.genecards.org/cgi-bin/carddisp.pl?gene=ASCC2
IMP4	IMP U3 Small Nucleolar Ribonucleoprotein 4	Protein Coding	34	GC02P130342	0.585743	https://www.genecards.org/cgi-bin/carddisp.pl?gene=IMP4
COMMD8	COMM Domain Containing 8	Protein Coding	34	GC04M047369	0.585743	https://www.genecards.org/cgi-bin/carddisp.pl?gene=COMMD8
COMMD9	COMM Domain Containing 9	Protein Coding	34	GC11M036293	0.585743	https://www.genecards.org/cgi-bin/carddisp.pl?gene=COMMD9
FUNDC2	FUN14 Domain Containing 2	Protein Coding	34	GC0XP155025	0.585743	https://www.genecards.org/cgi-bin/carddisp.pl?gene=FUNDC2
OCIAD1	OCIA Domain Containing 1	Protein Coding	34	GC04P048805	0.585743	https://www.genecards.org/cgi-bin/carddisp.pl?gene=OCIAD1
PBXIP1	PBX Homeobox Interacting Protein 1	Protein Coding	34	GC01M154944	0.585743	https://www.genecards.org/cgi-bin/carddisp.pl?gene=PBXIP1
MRPS33	Mitochondrial Ribosomal Protein S33	Protein Coding	34	GC07M141021	0.585743	https://www.genecards.org/cgi-bin/carddisp.pl?gene=MRPS33
MRPS15	Mitochondrial Ribosomal Protein S15	Protein Coding	34	GC01M036455	0.585743	https://www.genecards.org/cgi-bin/carddisp.pl?gene=MRPS15
LRRC41	Leucine Rich Repeat Containing 41	Protein Coding	34	GC01M046261	0.585743	https://www.genecards.org/cgi-bin/carddisp.pl?gene=LRRC41
RALGAPB	Ral GTPase Activating Protein Non-Catalytic Subunit Beta	Protein Coding	34	GC20P038472	0.585743	https://www.genecards.org/cgi-bin/carddisp.pl?gene=RALGAPB
PIGX	Phosphatidylinositol Glycan Anchor Biosynthesis Class X	Protein Coding	34	GC03P196643	0.585743	https://www.genecards.org/cgi-bin/carddisp.pl?gene=PIGX
PHLDB2	Pleckstrin Homology Like Domain Family B Member 2	Protein Coding	34	GC03P111732	0.585743	https://www.genecards.org/cgi-bin/carddisp.pl?gene=PHLDB2
MAD2L1BP	MAD2L1 Binding Protein	Protein Coding	34	GC06P043629	0.585743	https://www.genecards.org/cgi-bin/carddisp.pl?gene=MAD2L1BP
SUGP2	SURP And G-Patch Domain Containing 2	Protein Coding	34	GC19M018990	0.585743	https://www.genecards.org/cgi-bin/carddisp.pl?gene=SUGP2
SLC35F1	Solute Carrier Family 35 Member F1	Protein Coding	34	GC06P117907	0.585743	https://www.genecards.org/cgi-bin/carddisp.pl?gene=SLC35F1
RRS1	Ribosome Biogenesis Regulator 1 Homolog	Protein Coding	34	GC08P066429	0.585743	https://www.genecards.org/cgi-bin/carddisp.pl?gene=RRS1
UBL4A	Ubiquitin Like 4A	Protein Coding	34	GC0XM154483	0.585743	https://www.genecards.org/cgi-bin/carddisp.pl?gene=UBL4A
RNPC3	RNA Binding Region (RNP1, RRM) Containing 3	Protein Coding	34	GC01P103525	0.585743	https://www.genecards.org/cgi-bin/carddisp.pl?gene=RNPC3
ZMYM1	Zinc Finger MYM-Type Containing 1	Protein Coding	34	GC01P035032	0.585743	https://www.genecards.org/cgi-bin/carddisp.pl?gene=ZMYM1
YIPF3	Yip1 Domain Family Member 3	Protein Coding	34	GC06M051663	0.585743	https://www.genecards.org/cgi-bin/carddisp.pl?gene=YIPF3
UNK	Unk Zinc Finger	Protein Coding	34	GC17P075784	0.585743	https://www.genecards.org/cgi-bin/carddisp.pl?gene=UNK
UQCC2	Ubiquinol-Cytochrome C Reductase Complex Assembly Factor 2	Protein Coding	34	GC06M033694	0.585743	https://www.genecards.org/cgi-bin/carddisp.pl?gene=UQCC2
ZNF746	Zinc Finger Protein 746	Protein Coding	34	GC07M149472	0.585743	https://www.genecards.org/cgi-bin/carddisp.pl?gene=ZNF746
COMMD3	COMM Domain Containing 3	Protein Coding	33	GC10P022315	0.585743	https://www.genecards.org/cgi-bin/carddisp.pl?gene=COMMD3
COMMD5	COMM Domain Containing 5	Protein Coding	33	GC08M144837	0.585743	https://www.genecards.org/cgi-bin/carddisp.pl?gene=COMMD5
C15orf39	Chromosome 15 Open Reading Frame 39	Protein Coding	33	GC15P075195	0.585743	https://www.genecards.org/cgi-bin/carddisp.pl?gene=C15orf39
GID8	GID Complex Subunit 8 Homolog	Protein Coding	33	GC20P062938	0.585743	https://www.genecards.org/cgi-bin/carddisp.pl?gene=GID8
CCDC93	Coiled-Coil Domain Containing 93	Protein Coding	33	GC02M117915	0.585743	https://www.genecards.org/cgi-bin/carddisp.pl?gene=CCDC93
MON2	MON2 Homolog, Regulator Of Endosome-To-Golgi Trafficking	Protein Coding	33	GC12P062466	0.585743	https://www.genecards.org/cgi-bin/carddisp.pl?gene=MON2
R3HDM1	R3H Domain Containing 1	Protein Coding	33	GC02P135531	0.585743	https://www.genecards.org/cgi-bin/carddisp.pl?gene=R3HDM1
SPATS2	Spermatogenesis Associated Serine Rich 2	Protein Coding	33	GC12P049366	0.585743	https://www.genecards.org/cgi-bin/carddisp.pl?gene=SPATS2
PLGRKT	Plasminogen Receptor With A C-Terminal Lysine	Protein Coding	33	GC09M005357	0.585743	https://www.genecards.org/cgi-bin/carddisp.pl?gene=PLGRKT
WDTC1	WD And Tetratricopeptide Repeats 1	Protein Coding	33	GC01P027245	0.585743	https://www.genecards.org/cgi-bin/carddisp.pl?gene=WDTC1
YIPF6	Yip1 Domain Family Member 6	Protein Coding	33	GC0XP068498	0.585743	https://www.genecards.org/cgi-bin/carddisp.pl?gene=YIPF6
ZNF598	Zinc Finger Protein 598, E3 Ubiquitin Ligase	Protein Coding	33	GC16M004126	0.585743	https://www.genecards.org/cgi-bin/carddisp.pl?gene=ZNF598
AKAP17A	A-Kinase Anchoring Protein 17A	Protein Coding	32	GC0XP001591	0.585743	https://www.genecards.org/cgi-bin/carddisp.pl?gene=AKAP17A
CNPY4	Canopy FGF Signaling Regulator 4	Protein Coding	32	GC07P100119	0.585743	https://www.genecards.org/cgi-bin/carddisp.pl?gene=CNPY4
CEP128	Centrosomal Protein 128	Protein Coding	32	GC14M080476	0.585743	https://www.genecards.org/cgi-bin/carddisp.pl?gene=CEP128
COMMD10	COMM Domain Containing 10	Protein Coding	32	GC05P116084	0.585743	https://www.genecards.org/cgi-bin/carddisp.pl?gene=COMMD10
COMMD6	COMM Domain Containing 6	Protein Coding	32	GC13M075525	0.585743	https://www.genecards.org/cgi-bin/carddisp.pl?gene=COMMD6
FASTKD3	FAST Kinase Domains 3	Protein Coding	32	GC05M007860	0.585743	https://www.genecards.org/cgi-bin/carddisp.pl?gene=FASTKD3
FAM189B	Family With Sequence Similarity 189 Member B	Protein Coding	32	GC01M155248	0.585743	https://www.genecards.org/cgi-bin/carddisp.pl?gene=FAM189B
HEATR6	HEAT Repeat Containing 6	Protein Coding	32	GC17M060041	0.585743	https://www.genecards.org/cgi-bin/carddisp.pl?gene=HEATR6
LRCH3	Leucine Rich Repeats And Calponin Homology Domain Containing 3	Protein Coding	32	GC03P197791	0.585743	https://www.genecards.org/cgi-bin/carddisp.pl?gene=LRCH3
MAP9	Microtubule Associated Protein 9	Protein Coding	32	GC04M155342	0.585743	https://www.genecards.org/cgi-bin/carddisp.pl?gene=MAP9
MARCHF5	Membrane Associated Ring-CH-Type Finger 5	Protein Coding	32	GC10P092292	0.585743	https://www.genecards.org/cgi-bin/carddisp.pl?gene=MARCHF5
TRIM4	Tripartite Motif Containing 4	Protein Coding	32	GC07M099876	0.585743	https://www.genecards.org/cgi-bin/carddisp.pl?gene=TRIM4
SNRNP48	Small Nuclear Ribonucleoprotein U11/U12 Subunit 48	Protein Coding	32	GC06P007590	0.585743	https://www.genecards.org/cgi-bin/carddisp.pl?gene=SNRNP48
WDR89	WD Repeat Domain 89	Protein Coding	32	GC14M063597	0.585743	https://www.genecards.org/cgi-bin/carddisp.pl?gene=WDR89
WRAP73	WD Repeat Containing, Antisense To TP73	Protein Coding	32	GC01M003630	0.585743	https://www.genecards.org/cgi-bin/carddisp.pl?gene=WRAP73
UQCC1	Ubiquinol-Cytochrome C Reductase Complex Assembly Factor 1	Protein Coding	32	GC20M035302	0.585743	https://www.genecards.org/cgi-bin/carddisp.pl?gene=UQCC1
CCDC51	Coiled-Coil Domain Containing 51	Protein Coding	31	GC03M048432	0.585743	https://www.genecards.org/cgi-bin/carddisp.pl?gene=CCDC51
CCDC28A	Coiled-Coil Domain Containing 28A	Protein Coding	31	GC06P138773	0.585743	https://www.genecards.org/cgi-bin/carddisp.pl?gene=CCDC28A
NEURL4	Neuralized E3 Ubiquitin Protein Ligase 4	Protein Coding	31	GC17M007315	0.585743	https://www.genecards.org/cgi-bin/carddisp.pl?gene=NEURL4
RRP36	Ribosomal RNA Processing 36	Protein Coding	31	GC06P043021	0.585743	https://www.genecards.org/cgi-bin/carddisp.pl?gene=RRP36
ZNF609	Zinc Finger Protein 609	Protein Coding	31	GC15P082200	0.585743	https://www.genecards.org/cgi-bin/carddisp.pl?gene=ZNF609
ZNF691	Zinc Finger Protein 691	Protein Coding	31	GC01P042847	0.585743	https://www.genecards.org/cgi-bin/carddisp.pl?gene=ZNF691
DCAF10	DDB1 And CUL4 Associated Factor 10	Protein Coding	30	GC09P037800	0.585743	https://www.genecards.org/cgi-bin/carddisp.pl?gene=DCAF10
CMSS1	Cms1 Ribosomal Small Subunit Homolog	Protein Coding	30	GC03P099817	0.585743	https://www.genecards.org/cgi-bin/carddisp.pl?gene=CMSS1
IQCC	IQ Motif Containing C	Protein Coding	30	GC01P032205	0.585743	https://www.genecards.org/cgi-bin/carddisp.pl?gene=IQCC
MTREX	Mtr4 Exosome RNA Helicase	Protein Coding	30	GC05P055308	0.585743	https://www.genecards.org/cgi-bin/carddisp.pl?gene=MTREX
ZCCHC9	Zinc Finger CCHC-Type Containing 9	Protein Coding	30	GC05P081301	0.585743	https://www.genecards.org/cgi-bin/carddisp.pl?gene=ZCCHC9
ZNF787	Zinc Finger Protein 787	Protein Coding	30	GC19M056090	0.585743	https://www.genecards.org/cgi-bin/carddisp.pl?gene=ZNF787
EMC7	ER Membrane Protein Complex Subunit 7	Protein Coding	29	GC15M034084	0.585743	https://www.genecards.org/cgi-bin/carddisp.pl?gene=EMC7
LRCH2	Leucine Rich Repeats And Calponin Homology Domain Containing 2	Protein Coding	29	GC0XM115111	0.585743	https://www.genecards.org/cgi-bin/carddisp.pl?gene=LRCH2
SPTY2D1	SPT2 Chromatin Protein Domain Containing 1	Protein Coding	29	GC11M018627	0.585743	https://www.genecards.org/cgi-bin/carddisp.pl?gene=SPTY2D1
SELENOI	Selenoprotein I	Protein Coding	29	GC02P026310	0.585743	https://www.genecards.org/cgi-bin/carddisp.pl?gene=SELENOI
VWA8	Von Willebrand Factor A Domain Containing 8	Protein Coding	29	GC13M041569	0.585743	https://www.genecards.org/cgi-bin/carddisp.pl?gene=VWA8
C16orf91	Chromosome 16 Open Reading Frame 91	Protein Coding	28	GC16M004083	0.585743	https://www.genecards.org/cgi-bin/carddisp.pl?gene=C16orf91
TUT7	Terminal Uridylyl Transferase 7	Protein Coding	28	GC09M087416	0.585743	https://www.genecards.org/cgi-bin/carddisp.pl?gene=TUT7
UTP11	UTP11 Small Subunit Processome Component	Protein Coding	28	GC01P038056	0.585743	https://www.genecards.org/cgi-bin/carddisp.pl?gene=UTP11
ZNRD2	Zinc Ribbon Domain Containing 2	Protein Coding	28	GC11P067103	0.585743	https://www.genecards.org/cgi-bin/carddisp.pl?gene=ZNRD2
IGHG4	Immunoglobulin Heavy Constant Gamma 4 (G4m Marker)	Protein Coding	27	GC14M110876	0.585743	https://www.genecards.org/cgi-bin/carddisp.pl?gene=IGHG4
VPS35L	VPS35 Endosomal Protein Sorting Factor Like	Protein Coding	27	GC16P019555	0.585743	https://www.genecards.org/cgi-bin/carddisp.pl?gene=VPS35L
ECPAS	Ecm29 Proteasome Adaptor And Scaffold	Protein Coding	26	GC09M111361	0.585743	https://www.genecards.org/cgi-bin/carddisp.pl?gene=ECPAS
DIPK2A	Divergent Protein Kinase Domain 2A	Protein Coding	26	GC03P143973	0.585743	https://www.genecards.org/cgi-bin/carddisp.pl?gene=DIPK2A
VPS26C	VPS26 Endosomal Protein Sorting Factor C	Protein Coding	26	GC21M037225	0.585743	https://www.genecards.org/cgi-bin/carddisp.pl?gene=VPS26C
RADX	RPA1 Related Single Stranded DNA Binding Protein, X-Linked	Protein Coding	25	GC0XP106612	0.585743	https://www.genecards.org/cgi-bin/carddisp.pl?gene=RADX
PROSER3	Proline And Serine Rich 3	Protein Coding	25	GC19P042476	0.585743	https://www.genecards.org/cgi-bin/carddisp.pl?gene=PROSER3
CEBPZOS	CEBPZ Opposite Strand	Protein Coding	20	GC02P037196	0.585743	https://www.genecards.org/cgi-bin/carddisp.pl?gene=CEBPZOS
MIR148A	MicroRNA 148a	RNA Gene	19	GC07M025993	0.585743	https://www.genecards.org/cgi-bin/carddisp.pl?gene=MIR148A
IGHV3-72	Immunoglobulin Heavy Variable 3-72	Protein Coding	12	GC14M111029	0.585743	https://www.genecards.org/cgi-bin/carddisp.pl?gene=IGHV3-72
FGFR1	Fibroblast Growth Factor Receptor 1	Protein Coding	53	GC08M038400	0.520704	https://www.genecards.org/cgi-bin/carddisp.pl?gene=FGFR1
ATM	ATM Serine/Threonine Kinase	Protein Coding	52	GC11P108222	0.520704	https://www.genecards.org/cgi-bin/carddisp.pl?gene=ATM
ERBB2	Erb-B2 Receptor Tyrosine Kinase 2	Protein Coding	52	GC17P039687	0.520704	https://www.genecards.org/cgi-bin/carddisp.pl?gene=ERBB2
ERBB3	Erb-B2 Receptor Tyrosine Kinase 3	Protein Coding	52	GC12P056675	0.520704	https://www.genecards.org/cgi-bin/carddisp.pl?gene=ERBB3
MET	MET Proto-Oncogene, Receptor Tyrosine Kinase	Protein Coding	52	GC07P116672	0.520704	https://www.genecards.org/cgi-bin/carddisp.pl?gene=MET
MDM2	MDM2 Proto-Oncogene	Protein Coding	52	GC12P068808	0.520704	https://www.genecards.org/cgi-bin/carddisp.pl?gene=MDM2
PTPN11	Protein Tyrosine Phosphatase Non-Receptor Type 11	Protein Coding	52	GC12P112418	0.520704	https://www.genecards.org/cgi-bin/carddisp.pl?gene=PTPN11
TGFBR1	Transforming Growth Factor Beta Receptor 1	Protein Coding	52	GC09P099104	0.520704	https://www.genecards.org/cgi-bin/carddisp.pl?gene=TGFBR1
EPHA2	EPH Receptor A2	Protein Coding	51	GC01M016124	0.520704	https://www.genecards.org/cgi-bin/carddisp.pl?gene=EPHA2
IDH1	Isocitrate Dehydrogenase (NADP(+)) 1	Protein Coding	51	GC02M208236	0.520704	https://www.genecards.org/cgi-bin/carddisp.pl?gene=IDH1
ACVR1	Activin A Receptor Type 1	Protein Coding	50	GC02M157736	0.520704	https://www.genecards.org/cgi-bin/carddisp.pl?gene=ACVR1
GJA1	Gap Junction Protein Alpha 1	Protein Coding	50	GC06P121436	0.520704	https://www.genecards.org/cgi-bin/carddisp.pl?gene=GJA1
KRAS	KRAS Proto-Oncogene, GTPase	Protein Coding	50	GC12M025204	0.520704	https://www.genecards.org/cgi-bin/carddisp.pl?gene=KRAS
HNF4A	Hepatocyte Nuclear Factor 4 Alpha	Protein Coding	50	GC20P044355	0.520704	https://www.genecards.org/cgi-bin/carddisp.pl?gene=HNF4A
EPHB2	EPH Receptor B2	Protein Coding	50	GC01P022710	0.520704	https://www.genecards.org/cgi-bin/carddisp.pl?gene=EPHB2
HDAC6	Histone Deacetylase 6	Protein Coding	50	GC0XP048801	0.520704	https://www.genecards.org/cgi-bin/carddisp.pl?gene=HDAC6
NOTCH1	Notch Receptor 1	Protein Coding	50	GC09M136892	0.520704	https://www.genecards.org/cgi-bin/carddisp.pl?gene=NOTCH1
SLC9A1	Solute Carrier Family 9 Member A1	Protein Coding	50	GC01M027109	0.520704	https://www.genecards.org/cgi-bin/carddisp.pl?gene=SLC9A1
PLAU	Plasminogen Activator, Urokinase	Protein Coding	50	GC10P073909	0.520704	https://www.genecards.org/cgi-bin/carddisp.pl?gene=PLAU
UCHL1	Ubiquitin C-Terminal Hydrolase L1	Protein Coding	50	GC04P041256	0.520704	https://www.genecards.org/cgi-bin/carddisp.pl?gene=UCHL1
BMPR1A	Bone Morphogenetic Protein Receptor Type 1A	Protein Coding	49	GC10P086819	0.520704	https://www.genecards.org/cgi-bin/carddisp.pl?gene=BMPR1A
BMPR1B	Bone Morphogenetic Protein Receptor Type 1B	Protein Coding	49	GC04P094757	0.520704	https://www.genecards.org/cgi-bin/carddisp.pl?gene=BMPR1B
BMPR2	Bone Morphogenetic Protein Receptor Type 2	Protein Coding	49	GC02P202376	0.520704	https://www.genecards.org/cgi-bin/carddisp.pl?gene=BMPR2
ACAT1	Acetyl-CoA Acetyltransferase 1	Protein Coding	49	GC11P108121	0.520704	https://www.genecards.org/cgi-bin/carddisp.pl?gene=ACAT1
ALDH2	Aldehyde Dehydrogenase 2 Family Member	Protein Coding	49	GC12P111766	0.520704	https://www.genecards.org/cgi-bin/carddisp.pl?gene=ALDH2
MME	Membrane Metalloendopeptidase	Protein Coding	49	GC03P155024	0.520704	https://www.genecards.org/cgi-bin/carddisp.pl?gene=MME
PSEN2	Presenilin 2	Protein Coding	49	GC01P226870	0.520704	https://www.genecards.org/cgi-bin/carddisp.pl?gene=PSEN2
NOTCH3	Notch Receptor 3	Protein Coding	49	GC19M015159	0.520704	https://www.genecards.org/cgi-bin/carddisp.pl?gene=NOTCH3
SNAP25	Synaptosome Associated Protein 25	Protein Coding	49	GC20P010218	0.520704	https://www.genecards.org/cgi-bin/carddisp.pl?gene=SNAP25
STAT6	Signal Transducer And Activator Of Transcription 6	Protein Coding	49	GC12M057095	0.520704	https://www.genecards.org/cgi-bin/carddisp.pl?gene=STAT6
PRKDC	Protein Kinase, DNA-Activated, Catalytic Subunit	Protein Coding	49	GC08M047773	0.520704	https://www.genecards.org/cgi-bin/carddisp.pl?gene=PRKDC
TGFB2	Transforming Growth Factor Beta 2	Protein Coding	49	GC01P218345	0.520704	https://www.genecards.org/cgi-bin/carddisp.pl?gene=TGFB2
PTPRF	Protein Tyrosine Phosphatase Receptor Type F	Protein Coding	49	GC01P043527	0.520704	https://www.genecards.org/cgi-bin/carddisp.pl?gene=PTPRF
NOTCH2	Notch Receptor 2	Protein Coding	49	GC01M119911	0.520704	https://www.genecards.org/cgi-bin/carddisp.pl?gene=NOTCH2
TGFBR2	Transforming Growth Factor Beta Receptor 2	Protein Coding	49	GC03P030623	0.520704	https://www.genecards.org/cgi-bin/carddisp.pl?gene=TGFBR2
TNFRSF10B	TNF Receptor Superfamily Member 10b	Protein Coding	49	GC08M023020	0.520704	https://www.genecards.org/cgi-bin/carddisp.pl?gene=TNFRSF10B
CYP1B1	Cytochrome P450 Family 1 Subfamily B Member 1	Protein Coding	48	GC02M038066	0.520704	https://www.genecards.org/cgi-bin/carddisp.pl?gene=CYP1B1
EXT1	Exostosin Glycosyltransferase 1	Protein Coding	48	GC08M117798	0.520704	https://www.genecards.org/cgi-bin/carddisp.pl?gene=EXT1
GNAQ	G Protein Subunit Alpha Q	Protein Coding	48	GC09M077716	0.520704	https://www.genecards.org/cgi-bin/carddisp.pl?gene=GNAQ
GSK3A	Glycogen Synthase Kinase 3 Alpha	Protein Coding	48	GC19M051225	0.520704	https://www.genecards.org/cgi-bin/carddisp.pl?gene=GSK3A
ITGA6	Integrin Subunit Alpha 6	Protein Coding	48	GC02P172427	0.520704	https://www.genecards.org/cgi-bin/carddisp.pl?gene=ITGA6
NR2F2	Nuclear Receptor Subfamily 2 Group F Member 2	Protein Coding	48	GC15P096325	0.520704	https://www.genecards.org/cgi-bin/carddisp.pl?gene=NR2F2
NRAS	NRAS Proto-Oncogene, GTPase	Protein Coding	48	GC01M114704	0.520704	https://www.genecards.org/cgi-bin/carddisp.pl?gene=NRAS
IFNGR1	Interferon Gamma Receptor 1	Protein Coding	48	GC06M137197	0.520704	https://www.genecards.org/cgi-bin/carddisp.pl?gene=IFNGR1
RAC1	Rac Family Small GTPase 1	Protein Coding	48	GC07P006377	0.520704	https://www.genecards.org/cgi-bin/carddisp.pl?gene=RAC1
SLC12A6	Solute Carrier Family 12 Member 6	Protein Coding	48	GC15M034229	0.520704	https://www.genecards.org/cgi-bin/carddisp.pl?gene=SLC12A6
NF1	Neurofibromin 1	Protein Coding	48	GC17P031094	0.520704	https://www.genecards.org/cgi-bin/carddisp.pl?gene=NF1
USP8	Ubiquitin Specific Peptidase 8	Protein Coding	48	GC15P050424	0.520704	https://www.genecards.org/cgi-bin/carddisp.pl?gene=USP8
ECE1	Endothelin Converting Enzyme 1	Protein Coding	47	GC01M021217	0.520704	https://www.genecards.org/cgi-bin/carddisp.pl?gene=ECE1
CAV1	Caveolin 1	Protein Coding	47	GC07P116524	0.520704	https://www.genecards.org/cgi-bin/carddisp.pl?gene=CAV1
ALDH1A2	Aldehyde Dehydrogenase 1 Family Member A2	Protein Coding	47	GC15M070434	0.520704	https://www.genecards.org/cgi-bin/carddisp.pl?gene=ALDH1A2
ADCY6	Adenylate Cyclase 6	Protein Coding	47	GC12M048766	0.520704	https://www.genecards.org/cgi-bin/carddisp.pl?gene=ADCY6
CTNNA1	Catenin Alpha 1	Protein Coding	47	GC05P138613	0.520704	https://www.genecards.org/cgi-bin/carddisp.pl?gene=CTNNA1
GGT1	Gamma-Glutamyltransferase 1	Protein Coding	47	GC22P024583	0.520704	https://www.genecards.org/cgi-bin/carddisp.pl?gene=GGT1
PGM1	Phosphoglucomutase 1	Protein Coding	47	GC01P063593	0.520704	https://www.genecards.org/cgi-bin/carddisp.pl?gene=PGM1
TOP1	DNA Topoisomerase I	Protein Coding	47	GC20P041028	0.520704	https://www.genecards.org/cgi-bin/carddisp.pl?gene=TOP1
RHEB	Ras Homolog, MTORC1 Binding	Protein Coding	47	GC07M151466	0.520704	https://www.genecards.org/cgi-bin/carddisp.pl?gene=RHEB
EEF1A2	Eukaryotic Translation Elongation Factor 1 Alpha 2	Protein Coding	46	GC20M063488	0.520704	https://www.genecards.org/cgi-bin/carddisp.pl?gene=EEF1A2
ACVR1B	Activin A Receptor Type 1B	Protein Coding	46	GC12P051951	0.520704	https://www.genecards.org/cgi-bin/carddisp.pl?gene=ACVR1B
AKR1B1	Aldo-Keto Reductase Family 1 Member B	Protein Coding	46	GC07M134442	0.520704	https://www.genecards.org/cgi-bin/carddisp.pl?gene=AKR1B1
ACO2	Aconitase 2	Protein Coding	46	GC22P041448	0.520704	https://www.genecards.org/cgi-bin/carddisp.pl?gene=ACO2
CLDN1	Claudin 1	Protein Coding	46	GC03M190305	0.520704	https://www.genecards.org/cgi-bin/carddisp.pl?gene=CLDN1
CA12	Carbonic Anhydrase 12	Protein Coding	46	GC15M063321	0.520704	https://www.genecards.org/cgi-bin/carddisp.pl?gene=CA12
FASLG	Fas Ligand	Protein Coding	46	GC01P172628	0.520704	https://www.genecards.org/cgi-bin/carddisp.pl?gene=FASLG
EPCAM	Epithelial Cell Adhesion Molecule	Protein Coding	46	GC02P047345	0.520704	https://www.genecards.org/cgi-bin/carddisp.pl?gene=EPCAM
CD44	CD44 Molecule (Indian Blood Group)	Protein Coding	46	GC11P035139	0.520704	https://www.genecards.org/cgi-bin/carddisp.pl?gene=CD44
HSPA9	Heat Shock Protein Family A (Hsp70) Member 9	Protein Coding	46	GC05M138554	0.520704	https://www.genecards.org/cgi-bin/carddisp.pl?gene=HSPA9
HSPA8	Heat Shock Protein Family A (Hsp70) Member 8	Protein Coding	46	GC11M123057	0.520704	https://www.genecards.org/cgi-bin/carddisp.pl?gene=HSPA8
ITGA3	Integrin Subunit Alpha 3	Protein Coding	46	GC17P050055	0.520704	https://www.genecards.org/cgi-bin/carddisp.pl?gene=ITGA3
GUSB	Glucuronidase Beta	Protein Coding	46	GC07M065960	0.520704	https://www.genecards.org/cgi-bin/carddisp.pl?gene=GUSB
KYNU	Kynureninase	Protein Coding	46	GC02P142877	0.520704	https://www.genecards.org/cgi-bin/carddisp.pl?gene=KYNU
OAT	Ornithine Aminotransferase	Protein Coding	46	GC10M124397	0.520704	https://www.genecards.org/cgi-bin/carddisp.pl?gene=OAT
PC	Pyruvate Carboxylase	Protein Coding	46	GC11M066848	0.520704	https://www.genecards.org/cgi-bin/carddisp.pl?gene=PC
PCCA	Propionyl-CoA Carboxylase Subunit Alpha	Protein Coding	46	GC13P100089	0.520704	https://www.genecards.org/cgi-bin/carddisp.pl?gene=PCCA
PCCB	Propionyl-CoA Carboxylase Subunit Beta	Protein Coding	46	GC03P136250	0.520704	https://www.genecards.org/cgi-bin/carddisp.pl?gene=PCCB
MSN	Moesin	Protein Coding	46	GC0XP065588	0.520704	https://www.genecards.org/cgi-bin/carddisp.pl?gene=MSN
PROS1	Protein S	Protein Coding	46	GC03M093873	0.520704	https://www.genecards.org/cgi-bin/carddisp.pl?gene=PROS1
PSAT1	Phosphoserine Aminotransferase 1	Protein Coding	46	GC09P078297	0.520704	https://www.genecards.org/cgi-bin/carddisp.pl?gene=PSAT1
PDHX	Pyruvate Dehydrogenase Complex Component X	Protein Coding	46	GC11P034894	0.520704	https://www.genecards.org/cgi-bin/carddisp.pl?gene=PDHX
PISD	Phosphatidylserine Decarboxylase	Protein Coding	46	GC22M031975	0.520704	https://www.genecards.org/cgi-bin/carddisp.pl?gene=PISD
PTPRJ	Protein Tyrosine Phosphatase Receptor Type J	Protein Coding	46	GC11P048002	0.520704	https://www.genecards.org/cgi-bin/carddisp.pl?gene=PTPRJ
ROR1	Receptor Tyrosine Kinase Like Orphan Receptor 1	Protein Coding	46	GC01P063774	0.520704	https://www.genecards.org/cgi-bin/carddisp.pl?gene=ROR1
SIRT3	Sirtuin 3	Protein Coding	46	GC11M000215	0.520704	https://www.genecards.org/cgi-bin/carddisp.pl?gene=SIRT3
SLC22A5	Solute Carrier Family 22 Member 5	Protein Coding	46	GC05P132369	0.520704	https://www.genecards.org/cgi-bin/carddisp.pl?gene=SLC22A5
SETD2	SET Domain Containing 2, Histone Lysine Methyltransferase	Protein Coding	46	GC03M047033	0.520704	https://www.genecards.org/cgi-bin/carddisp.pl?gene=SETD2
YWHAQ	Tyrosine 3-Monooxygenase/Tryptophan 5-Monooxygenase Activation Protein Theta	Protein Coding	46	GC02M009583	0.520704	https://www.genecards.org/cgi-bin/carddisp.pl?gene=YWHAQ
USP9X	Ubiquitin Specific Peptidase 9 X-Linked	Protein Coding	46	GC0XP041085	0.520704	https://www.genecards.org/cgi-bin/carddisp.pl?gene=USP9X
EIF2S3	Eukaryotic Translation Initiation Factor 2 Subunit Gamma	Protein Coding	45	GC0XP024054	0.520704	https://www.genecards.org/cgi-bin/carddisp.pl?gene=EIF2S3
DHCR24	24-Dehydrocholesterol Reductase	Protein Coding	45	GC01M054849	0.520704	https://www.genecards.org/cgi-bin/carddisp.pl?gene=DHCR24
ACADS	Acyl-CoA Dehydrogenase Short Chain	Protein Coding	45	GC12P120976	0.520704	https://www.genecards.org/cgi-bin/carddisp.pl?gene=ACADS
ACADSB	Acyl-CoA Dehydrogenase Short/Branched Chain	Protein Coding	45	GC10P123008	0.520704	https://www.genecards.org/cgi-bin/carddisp.pl?gene=ACADSB
ACVR2A	Activin A Receptor Type 2A	Protein Coding	45	GC02P147844	0.520704	https://www.genecards.org/cgi-bin/carddisp.pl?gene=ACVR2A
CBR1	Carbonyl Reductase 1	Protein Coding	45	GC21P036069	0.520704	https://www.genecards.org/cgi-bin/carddisp.pl?gene=CBR1
ALDH5A1	Aldehyde Dehydrogenase 5 Family Member A1	Protein Coding	45	GC06P024494	0.520704	https://www.genecards.org/cgi-bin/carddisp.pl?gene=ALDH5A1
CLU	Clusterin	Protein Coding	45	GC08M027596	0.520704	https://www.genecards.org/cgi-bin/carddisp.pl?gene=CLU
APOB	Apolipoprotein B	Protein Coding	45	GC02M020956	0.520704	https://www.genecards.org/cgi-bin/carddisp.pl?gene=APOB
ARHGEF2	Rho/Rac Guanine Nucleotide Exchange Factor 2	Protein Coding	45	GC01M155946	0.520704	https://www.genecards.org/cgi-bin/carddisp.pl?gene=ARHGEF2
CFH	Complement Factor H	Protein Coding	45	GC01P196621	0.520704	https://www.genecards.org/cgi-bin/carddisp.pl?gene=CFH
ITCH	Itchy E3 Ubiquitin Protein Ligase	Protein Coding	45	GC20P034363	0.520704	https://www.genecards.org/cgi-bin/carddisp.pl?gene=ITCH
GLO1	Glyoxalase I	Protein Coding	45	GC06M051573	0.520704	https://www.genecards.org/cgi-bin/carddisp.pl?gene=GLO1
FKBP1A	FKBP Prolyl Isomerase 1A	Protein Coding	45	GC20M001369	0.520704	https://www.genecards.org/cgi-bin/carddisp.pl?gene=FKBP1A
EXTL3	Exostosin Like Glycosyltransferase 3	Protein Coding	45	GC08P028604	0.520704	https://www.genecards.org/cgi-bin/carddisp.pl?gene=EXTL3
GNPAT	Glyceronephosphate O-Acyltransferase	Protein Coding	45	GC01P231241	0.520704	https://www.genecards.org/cgi-bin/carddisp.pl?gene=GNPAT
GPD2	Glycerol-3-Phosphate Dehydrogenase 2	Protein Coding	45	GC02P156435	0.520704	https://www.genecards.org/cgi-bin/carddisp.pl?gene=GPD2
GPI	Glucose-6-Phosphate Isomerase	Protein Coding	45	GC19P034359	0.520704	https://www.genecards.org/cgi-bin/carddisp.pl?gene=GPI
GNAL	G Protein Subunit Alpha L	Protein Coding	45	GC18P011689	0.520704	https://www.genecards.org/cgi-bin/carddisp.pl?gene=GNAL
HMGCR	3-Hydroxy-3-Methylglutaryl-CoA Reductase	Protein Coding	45	GC05P075336	0.520704	https://www.genecards.org/cgi-bin/carddisp.pl?gene=HMGCR
HMGA1	High Mobility Group AT-Hook 1	Protein Coding	45	GC06P061275	0.520704	https://www.genecards.org/cgi-bin/carddisp.pl?gene=HMGA1
FH	Fumarate Hydratase	Protein Coding	45	GC01M241499	0.520704	https://www.genecards.org/cgi-bin/carddisp.pl?gene=FH
EFNB1	Ephrin B1	Protein Coding	45	GC0XP068828	0.520704	https://www.genecards.org/cgi-bin/carddisp.pl?gene=EFNB1
EZR	Ezrin	Protein Coding	45	GC06M158765	0.520704	https://www.genecards.org/cgi-bin/carddisp.pl?gene=EZR
NDUFS8	NADH:Ubiquinone Oxidoreductase Core Subunit S8	Protein Coding	45	GC11P068030	0.520704	https://www.genecards.org/cgi-bin/carddisp.pl?gene=NDUFS8
OGDH	Oxoglutarate Dehydrogenase	Protein Coding	45	GC07P044606	0.520704	https://www.genecards.org/cgi-bin/carddisp.pl?gene=OGDH
NR5A2	Nuclear Receptor Subfamily 5 Group A Member 2	Protein Coding	45	GC01P199996	0.520704	https://www.genecards.org/cgi-bin/carddisp.pl?gene=NR5A2
NRG1	Neuregulin 1	Protein Coding	45	GC08P031639	0.520704	https://www.genecards.org/cgi-bin/carddisp.pl?gene=NRG1
MMP15	Matrix Metallopeptidase 15	Protein Coding	45	GC16P058025	0.520704	https://www.genecards.org/cgi-bin/carddisp.pl?gene=MMP15
LPAR1	Lysophosphatidic Acid Receptor 1	Protein Coding	45	GC09M110873	0.520704	https://www.genecards.org/cgi-bin/carddisp.pl?gene=LPAR1
MAN1B1	Mannosidase Alpha Class 1B Member 1	Protein Coding	45	GC09P137086	0.520704	https://www.genecards.org/cgi-bin/carddisp.pl?gene=MAN1B1
LSS	Lanosterol Synthase	Protein Coding	45	GC21M048933	0.520704	https://www.genecards.org/cgi-bin/carddisp.pl?gene=LSS
MDH1	Malate Dehydrogenase 1	Protein Coding	45	GC02P063557	0.520704	https://www.genecards.org/cgi-bin/carddisp.pl?gene=MDH1
PTPRA	Protein Tyrosine Phosphatase Receptor Type A	Protein Coding	45	GC20P002864	0.520704	https://www.genecards.org/cgi-bin/carddisp.pl?gene=PTPRA
RAB5A	RAB5A, Member RAS Oncogene Family	Protein Coding	45	GC03P019963	0.520704	https://www.genecards.org/cgi-bin/carddisp.pl?gene=RAB5A
PMM2	Phosphomannomutase 2	Protein Coding	45	GC16P008788	0.520704	https://www.genecards.org/cgi-bin/carddisp.pl?gene=PMM2
PKN1	Protein Kinase N1	Protein Coding	45	GC19P014433	0.520704	https://www.genecards.org/cgi-bin/carddisp.pl?gene=PKN1
POMT1	Protein O-Mannosyltransferase 1	Protein Coding	45	GC09P131502	0.520704	https://www.genecards.org/cgi-bin/carddisp.pl?gene=POMT1
PFKP	Phosphofructokinase, Platelet	Protein Coding	45	GC10P003066	0.520704	https://www.genecards.org/cgi-bin/carddisp.pl?gene=PFKP
SLC4A4	Solute Carrier Family 4 Member 4	Protein Coding	45	GC04P071063	0.520704	https://www.genecards.org/cgi-bin/carddisp.pl?gene=SLC4A4
WFS1	Wolframin ER Transmembrane Glycoprotein	Protein Coding	45	GC04P006260	0.520704	https://www.genecards.org/cgi-bin/carddisp.pl?gene=WFS1
TRPM4	Transient Receptor Potential Cation Channel Subfamily M Member 4	Protein Coding	45	GC19P049157	0.520704	https://www.genecards.org/cgi-bin/carddisp.pl?gene=TRPM4
BLVRA	Biliverdin Reductase A	Protein Coding	44	GC07P043758	0.520704	https://www.genecards.org/cgi-bin/carddisp.pl?gene=BLVRA
B4GALT1	Beta-1,4-Galactosyltransferase 1	Protein Coding	44	GC09M033100	0.520704	https://www.genecards.org/cgi-bin/carddisp.pl?gene=B4GALT1
ADIPOR1	Adiponectin Receptor 1	Protein Coding	44	GC01M202940	0.520704	https://www.genecards.org/cgi-bin/carddisp.pl?gene=ADIPOR1
ABHD5	Abhydrolase Domain Containing 5, Lysophosphatidic Acid Acyltransferase	Protein Coding	44	GC03P043707	0.520704	https://www.genecards.org/cgi-bin/carddisp.pl?gene=ABHD5
ADCY9	Adenylate Cyclase 9	Protein Coding	44	GC16M003953	0.520704	https://www.genecards.org/cgi-bin/carddisp.pl?gene=ADCY9
ATP6V0A2	ATPase H+ Transporting V0 Subunit A2	Protein Coding	44	GC12P123712	0.520704	https://www.genecards.org/cgi-bin/carddisp.pl?gene=ATP6V0A2
ATP6V1B1	ATPase H+ Transporting V1 Subunit B1	Protein Coding	44	GC02P070935	0.520704	https://www.genecards.org/cgi-bin/carddisp.pl?gene=ATP6V1B1
CS	Citrate Synthase	Protein Coding	44	GC12M056271	0.520704	https://www.genecards.org/cgi-bin/carddisp.pl?gene=CS
GPR37	G Protein-Coupled Receptor 37	Protein Coding	44	GC07M124745	0.520704	https://www.genecards.org/cgi-bin/carddisp.pl?gene=GPR37
CD38	CD38 Molecule	Protein Coding	44	GC04P015780	0.520704	https://www.genecards.org/cgi-bin/carddisp.pl?gene=CD38
DDOST	Dolichyl-Diphosphooligosaccharide--Protein Glycosyltransferase Non-Catalytic Subunit	Protein Coding	44	GC01M020651	0.520704	https://www.genecards.org/cgi-bin/carddisp.pl?gene=DDOST
GFM1	G Elongation Factor Mitochondrial 1	Protein Coding	44	GC03P158644	0.520704	https://www.genecards.org/cgi-bin/carddisp.pl?gene=GFM1
HSPA1A	Heat Shock Protein Family A (Hsp70) Member 1A	Protein Coding	44	GC06P061188	0.520704	https://www.genecards.org/cgi-bin/carddisp.pl?gene=HSPA1A
GNA13	G Protein Subunit Alpha 13	Protein Coding	44	GC17M065009	0.520704	https://www.genecards.org/cgi-bin/carddisp.pl?gene=GNA13
HMGCS2	3-Hydroxy-3-Methylglutaryl-CoA Synthase 2	Protein Coding	44	GC01M119747	0.520704	https://www.genecards.org/cgi-bin/carddisp.pl?gene=HMGCS2
HINT1	Histidine Triad Nucleotide Binding Protein 1	Protein Coding	44	GC05M131159	0.520704	https://www.genecards.org/cgi-bin/carddisp.pl?gene=HINT1
HLA-G	Major Histocompatibility Complex, Class I, G	Protein Coding	44	GC06P061122	0.520704	https://www.genecards.org/cgi-bin/carddisp.pl?gene=HLA-G
EPHB3	EPH Receptor B3	Protein Coding	44	GC03P184561	0.520704	https://www.genecards.org/cgi-bin/carddisp.pl?gene=EPHB3
OSMR	Oncostatin M Receptor	Protein Coding	44	GC05P038845	0.520704	https://www.genecards.org/cgi-bin/carddisp.pl?gene=OSMR
NDUFA10	NADH:Ubiquinone Oxidoreductase Subunit A10	Protein Coding	44	GC02M239893	0.520704	https://www.genecards.org/cgi-bin/carddisp.pl?gene=NDUFA10
NR2C2	Nuclear Receptor Subfamily 2 Group C Member 2	Protein Coding	44	GC03P014947	0.520704	https://www.genecards.org/cgi-bin/carddisp.pl?gene=NR2C2
NDUFS2	NADH:Ubiquinone Oxidoreductase Core Subunit S2	Protein Coding	44	GC01P161197	0.520704	https://www.genecards.org/cgi-bin/carddisp.pl?gene=NDUFS2
MAPRE1	Microtubule Associated Protein RP/EB Family Member 1	Protein Coding	44	GC20P032819	0.520704	https://www.genecards.org/cgi-bin/carddisp.pl?gene=MAPRE1
IGFBP3	Insulin Like Growth Factor Binding Protein 3	Protein Coding	44	GC07M045912	0.520704	https://www.genecards.org/cgi-bin/carddisp.pl?gene=IGFBP3
MGLL	Monoglyceride Lipase	Protein Coding	44	GC03M127689	0.520704	https://www.genecards.org/cgi-bin/carddisp.pl?gene=MGLL
PNPLA2	Patatin Like Phospholipase Domain Containing 2	Protein Coding	44	GC11P001178	0.520704	https://www.genecards.org/cgi-bin/carddisp.pl?gene=PNPLA2
POMGNT1	Protein O-Linked Mannose N-Acetylglucosaminyltransferase 1 (Beta 1,2-)	Protein Coding	44	GC01M046188	0.520704	https://www.genecards.org/cgi-bin/carddisp.pl?gene=POMGNT1
PDIA3	Protein Disulfide Isomerase Family A Member 3	Protein Coding	44	GC15P043746	0.520704	https://www.genecards.org/cgi-bin/carddisp.pl?gene=PDIA3
TCIRG1	T Cell Immune Regulator 1, ATPase H+ Transporting V0 Subunit A3	Protein Coding	44	GC11P068041	0.520704	https://www.genecards.org/cgi-bin/carddisp.pl?gene=TCIRG1
SLC12A4	Solute Carrier Family 12 Member 4	Protein Coding	44	GC16M067965	0.520704	https://www.genecards.org/cgi-bin/carddisp.pl?gene=SLC12A4
SHC1	SHC Adaptor Protein 1	Protein Coding	44	GC01M154962	0.520704	https://www.genecards.org/cgi-bin/carddisp.pl?gene=SHC1
SLC12A7	Solute Carrier Family 12 Member 7	Protein Coding	44	GC05M001050	0.520704	https://www.genecards.org/cgi-bin/carddisp.pl?gene=SLC12A7
S1PR3	Sphingosine-1-Phosphate Receptor 3	Protein Coding	44	GC09P088991	0.520704	https://www.genecards.org/cgi-bin/carddisp.pl?gene=S1PR3
S1PR5	Sphingosine-1-Phosphate Receptor 5	Protein Coding	44	GC19M010512	0.520704	https://www.genecards.org/cgi-bin/carddisp.pl?gene=S1PR5
SLC20A1	Solute Carrier Family 20 Member 1	Protein Coding	44	GC02P118061	0.520704	https://www.genecards.org/cgi-bin/carddisp.pl?gene=SLC20A1
SLC26A2	Solute Carrier Family 26 Member 2	Protein Coding	44	GC05P149944	0.520704	https://www.genecards.org/cgi-bin/carddisp.pl?gene=SLC26A2
TNFSF15	TNF Superfamily Member 15	Protein Coding	44	GC09M114784	0.520704	https://www.genecards.org/cgi-bin/carddisp.pl?gene=TNFSF15
TNFRSF21	TNF Receptor Superfamily Member 21	Protein Coding	44	GC06M047231	0.520704	https://www.genecards.org/cgi-bin/carddisp.pl?gene=TNFRSF21
SQLE	Squalene Epoxidase	Protein Coding	44	GC08P124998	0.520704	https://www.genecards.org/cgi-bin/carddisp.pl?gene=SQLE
STEAP3	STEAP3 Metalloreductase	Protein Coding	44	GC02P119222	0.520704	https://www.genecards.org/cgi-bin/carddisp.pl?gene=STEAP3
STT3A	STT3 Oligosaccharyltransferase Complex Catalytic Subunit A	Protein Coding	44	GC11P125592	0.520704	https://www.genecards.org/cgi-bin/carddisp.pl?gene=STT3A
SLC6A6	Solute Carrier Family 6 Member 6	Protein Coding	44	GC03P014402	0.520704	https://www.genecards.org/cgi-bin/carddisp.pl?gene=SLC6A6
SGCD	Sarcoglycan Delta	Protein Coding	44	GC05P155686	0.520704	https://www.genecards.org/cgi-bin/carddisp.pl?gene=SGCD
NDRG1	N-Myc Downstream Regulated 1	Protein Coding	44	GC08M133237	0.520704	https://www.genecards.org/cgi-bin/carddisp.pl?gene=NDRG1
NDUFA12	NADH:Ubiquinone Oxidoreductase Subunit A12	Protein Coding	44	GC12M094898	0.520704	https://www.genecards.org/cgi-bin/carddisp.pl?gene=NDUFA12
TNFRSF10A	TNF Receptor Superfamily Member 10a	Protein Coding	44	GC08M023190	0.520704	https://www.genecards.org/cgi-bin/carddisp.pl?gene=TNFRSF10A
WWP2	WW Domain Containing E3 Ubiquitin Protein Ligase 2	Protein Coding	44	GC16P069796	0.520704	https://www.genecards.org/cgi-bin/carddisp.pl?gene=WWP2
CYB5A	Cytochrome B5 Type A	Protein Coding	43	GC18M074250	0.520704	https://www.genecards.org/cgi-bin/carddisp.pl?gene=CYB5A
EEA1	Early Endosome Antigen 1	Protein Coding	43	GC12M092770	0.520704	https://www.genecards.org/cgi-bin/carddisp.pl?gene=EEA1
CANT1	Calcium Activated Nucleotidase 1	Protein Coding	43	GC17M078992	0.520704	https://www.genecards.org/cgi-bin/carddisp.pl?gene=CANT1
AKR1A1	Aldo-Keto Reductase Family 1 Member A1	Protein Coding	43	GC01P045550	0.520704	https://www.genecards.org/cgi-bin/carddisp.pl?gene=AKR1A1
ACO1	Aconitase 1	Protein Coding	43	GC09P032374	0.520704	https://www.genecards.org/cgi-bin/carddisp.pl?gene=ACO1
AHCYL1	Adenosylhomocysteinase Like 1	Protein Coding	43	GC01P109984	0.520704	https://www.genecards.org/cgi-bin/carddisp.pl?gene=AHCYL1
ALG8	ALG8 Alpha-1,3-Glucosyltransferase	Protein Coding	43	GC11M078100	0.520704	https://www.genecards.org/cgi-bin/carddisp.pl?gene=ALG8
ANXA4	Annexin A4	Protein Coding	43	GC02P069644	0.520704	https://www.genecards.org/cgi-bin/carddisp.pl?gene=ANXA4
HUWE1	HECT, UBA And WWE Domain Containing E3 Ubiquitin Protein Ligase 1	Protein Coding	43	GC0XM053532	0.520704	https://www.genecards.org/cgi-bin/carddisp.pl?gene=HUWE1
IMPA2	Inositol Monophosphatase 2	Protein Coding	43	GC18P011981	0.520704	https://www.genecards.org/cgi-bin/carddisp.pl?gene=IMPA2
HSPA6	Heat Shock Protein Family A (Hsp70) Member 6	Protein Coding	43	GC01P161524	0.520704	https://www.genecards.org/cgi-bin/carddisp.pl?gene=HSPA6
HARS2	Histidyl-TRNA Synthetase 2, Mitochondrial	Protein Coding	43	GC05P144437	0.520704	https://www.genecards.org/cgi-bin/carddisp.pl?gene=HARS2
HSPA1L	Heat Shock Protein Family A (Hsp70) Member 1 Like	Protein Coding	43	GC06M031809	0.520704	https://www.genecards.org/cgi-bin/carddisp.pl?gene=HSPA1L
HSPA2	Heat Shock Protein Family A (Hsp70) Member 2	Protein Coding	43	GC14P064535	0.520704	https://www.genecards.org/cgi-bin/carddisp.pl?gene=HSPA2
FXYD2	FXYD Domain Containing Ion Transport Regulator 2	Protein Coding	43	GC11M117800	0.520704	https://www.genecards.org/cgi-bin/carddisp.pl?gene=FXYD2
GBF1	Golgi Brefeldin A Resistant Guanine Nucleotide Exchange Factor 1	Protein Coding	43	GC10P102245	0.520704	https://www.genecards.org/cgi-bin/carddisp.pl?gene=GBF1
GCLC	Glutamate-Cysteine Ligase Catalytic Subunit	Protein Coding	43	GC06M053497	0.520704	https://www.genecards.org/cgi-bin/carddisp.pl?gene=GCLC
NRP2	Neuropilin 2	Protein Coding	43	GC02P205681	0.520704	https://www.genecards.org/cgi-bin/carddisp.pl?gene=NRP2
ORAI1	ORAI Calcium Release-Activated Calcium Modulator 1	Protein Coding	43	GC12P124177	0.520704	https://www.genecards.org/cgi-bin/carddisp.pl?gene=ORAI1
PTRH2	Peptidyl-TRNA Hydrolase 2	Protein Coding	43	GC17M059674	0.520704	https://www.genecards.org/cgi-bin/carddisp.pl?gene=PTRH2
PEX2	Peroxisomal Biogenesis Factor 2	Protein Coding	43	GC08M076980	0.520704	https://www.genecards.org/cgi-bin/carddisp.pl?gene=PEX2
PRPS2	Phosphoribosyl Pyrophosphate Synthetase 2	Protein Coding	43	GC0XP012791	0.520704	https://www.genecards.org/cgi-bin/carddisp.pl?gene=PRPS2
PSMA4	Proteasome 20S Subunit Alpha 4	Protein Coding	43	GC15P078540	0.520704	https://www.genecards.org/cgi-bin/carddisp.pl?gene=PSMA4
PSMD4	Proteasome 26S Subunit Ubiquitin Receptor, Non-ATPase 4	Protein Coding	43	GC01P151256	0.520704	https://www.genecards.org/cgi-bin/carddisp.pl?gene=PSMD4
SLC46A1	Solute Carrier Family 46 Member 1	Protein Coding	43	GC17M031861	0.520704	https://www.genecards.org/cgi-bin/carddisp.pl?gene=SLC46A1
SMS	Spermine Synthase	Protein Coding	43	GC0XP021958	0.520704	https://www.genecards.org/cgi-bin/carddisp.pl?gene=SMS
SLC29A3	Solute Carrier Family 29 Member 3	Protein Coding	43	GC10P071320	0.520704	https://www.genecards.org/cgi-bin/carddisp.pl?gene=SLC29A3
SELENBP1	Selenium Binding Protein 1	Protein Coding	43	GC01M151364	0.520704	https://www.genecards.org/cgi-bin/carddisp.pl?gene=SELENBP1
SLC33A1	Solute Carrier Family 33 Member 1	Protein Coding	43	GC03M155821	0.520704	https://www.genecards.org/cgi-bin/carddisp.pl?gene=SLC33A1
SLC37A4	Solute Carrier Family 37 Member 4	Protein Coding	43	GC11M119024	0.520704	https://www.genecards.org/cgi-bin/carddisp.pl?gene=SLC37A4
UBE2G2	Ubiquitin Conjugating Enzyme E2 G2	Protein Coding	43	GC21M044768	0.520704	https://www.genecards.org/cgi-bin/carddisp.pl?gene=UBE2G2
SLC4A2	Solute Carrier Family 4 Member 2	Protein Coding	43	GC07P151057	0.520704	https://www.genecards.org/cgi-bin/carddisp.pl?gene=SLC4A2
RHOB	Ras Homolog Family Member B	Protein Coding	43	GC02P020447	0.520704	https://www.genecards.org/cgi-bin/carddisp.pl?gene=RHOB
STIP1	Stress Induced Phosphoprotein 1	Protein Coding	43	GC11P064212	0.520704	https://www.genecards.org/cgi-bin/carddisp.pl?gene=STIP1
SLK	STE20 Like Kinase	Protein Coding	43	GC10P103967	0.520704	https://www.genecards.org/cgi-bin/carddisp.pl?gene=SLK
VAMP2	Vesicle Associated Membrane Protein 2	Protein Coding	43	GC17M009459	0.520704	https://www.genecards.org/cgi-bin/carddisp.pl?gene=VAMP2
EEF1A1	Eukaryotic Translation Elongation Factor 1 Alpha 1	Protein Coding	42	GC06M073515	0.520704	https://www.genecards.org/cgi-bin/carddisp.pl?gene=EEF1A1
EBP	EBP Cholestenol Delta-Isomerase	Protein Coding	42	GC0XP048521	0.520704	https://www.genecards.org/cgi-bin/carddisp.pl?gene=EBP
DNAJB2	DnaJ Heat Shock Protein Family (Hsp40) Member B2	Protein Coding	42	GC02P219279	0.520704	https://www.genecards.org/cgi-bin/carddisp.pl?gene=DNAJB2
DLG1	Discs Large MAGUK Scaffold Protein 1	Protein Coding	42	GC03M197042	0.520704	https://www.genecards.org/cgi-bin/carddisp.pl?gene=DLG1
CALD1	Caldesmon 1	Protein Coding	42	GC07P134744	0.520704	https://www.genecards.org/cgi-bin/carddisp.pl?gene=CALD1
CAV2	Caveolin 2	Protein Coding	42	GC07P116287	0.520704	https://www.genecards.org/cgi-bin/carddisp.pl?gene=CAV2
B4GALT7	Beta-1,4-Galactosyltransferase 7	Protein Coding	42	GC05P177600	0.520704	https://www.genecards.org/cgi-bin/carddisp.pl?gene=B4GALT7
ABCB8	ATP Binding Cassette Subfamily B Member 8	Protein Coding	42	GC07P151028	0.520704	https://www.genecards.org/cgi-bin/carddisp.pl?gene=ABCB8
CNDP2	Carnosine Dipeptidase 2	Protein Coding	42	GC18P074495	0.520704	https://www.genecards.org/cgi-bin/carddisp.pl?gene=CNDP2
BAMBI	BMP And Activin Membrane Bound Inhibitor	Protein Coding	42	GC10P028685	0.520704	https://www.genecards.org/cgi-bin/carddisp.pl?gene=BAMBI
CRYZ	Crystallin Zeta	Protein Coding	42	GC01M074705	0.520704	https://www.genecards.org/cgi-bin/carddisp.pl?gene=CRYZ
CTTN	Cortactin	Protein Coding	42	GC11P070398	0.520704	https://www.genecards.org/cgi-bin/carddisp.pl?gene=CTTN
ATP12A	ATPase H+/K+ Transporting Non-Gastric Alpha2 Subunit	Protein Coding	42	GC13P024680	0.520704	https://www.genecards.org/cgi-bin/carddisp.pl?gene=ATP12A
APH1A	Aph-1 Homolog A, Gamma-Secretase Subunit	Protein Coding	42	GC01M150265	0.520704	https://www.genecards.org/cgi-bin/carddisp.pl?gene=APH1A
HSPH1	Heat Shock Protein Family H (Hsp110) Member 1	Protein Coding	42	GC13M031134	0.520704	https://www.genecards.org/cgi-bin/carddisp.pl?gene=HSPH1
HFE	Homeostatic Iron Regulator	Protein Coding	42	GC06P026087	0.520704	https://www.genecards.org/cgi-bin/carddisp.pl?gene=HFE
FANCG	FA Complementation Group G	Protein Coding	42	GC09M035073	0.520704	https://www.genecards.org/cgi-bin/carddisp.pl?gene=FANCG
FKBP8	FKBP Prolyl Isomerase 8	Protein Coding	42	GC19M018503	0.520704	https://www.genecards.org/cgi-bin/carddisp.pl?gene=FKBP8
KDM5B	Lysine Demethylase 5B	Protein Coding	42	GC01M202696	0.520704	https://www.genecards.org/cgi-bin/carddisp.pl?gene=KDM5B
CTNNA2	Catenin Alpha 2	Protein Coding	42	GC02P079185	0.520704	https://www.genecards.org/cgi-bin/carddisp.pl?gene=CTNNA2
CYP2S1	Cytochrome P450 Family 2 Subfamily S Member 1	Protein Coding	42	GC19P041193	0.520704	https://www.genecards.org/cgi-bin/carddisp.pl?gene=CYP2S1
GOSR2	Golgi SNAP Receptor Complex Member 2	Protein Coding	42	GC17P047319	0.520704	https://www.genecards.org/cgi-bin/carddisp.pl?gene=GOSR2
FLRT3	Fibronectin Leucine Rich Transmembrane Protein 3	Protein Coding	42	GC20M014322	0.520704	https://www.genecards.org/cgi-bin/carddisp.pl?gene=FLRT3
GABARAPL2	GABA Type A Receptor Associated Protein Like 2	Protein Coding	42	GC16P075566	0.520704	https://www.genecards.org/cgi-bin/carddisp.pl?gene=GABARAPL2
FSCN1	Fascin Actin-Bundling Protein 1	Protein Coding	42	GC07P005592	0.520704	https://www.genecards.org/cgi-bin/carddisp.pl?gene=FSCN1
ITM2B	Integral Membrane Protein 2B	Protein Coding	42	GC13P048233	0.520704	https://www.genecards.org/cgi-bin/carddisp.pl?gene=ITM2B
FPGS	Folylpolyglutamate Synthase	Protein Coding	42	GC09P127794	0.520704	https://www.genecards.org/cgi-bin/carddisp.pl?gene=FPGS
DSC3	Desmocollin 3	Protein Coding	42	GC18M030990	0.520704	https://www.genecards.org/cgi-bin/carddisp.pl?gene=DSC3
MSMO1	Methylsterol Monooxygenase 1	Protein Coding	42	GC04P165327	0.520704	https://www.genecards.org/cgi-bin/carddisp.pl?gene=MSMO1
NME3	NME/NM23 Nucleoside Diphosphate Kinase 3	Protein Coding	42	GC16M001770	0.520704	https://www.genecards.org/cgi-bin/carddisp.pl?gene=NME3
LRP8	LDL Receptor Related Protein 8	Protein Coding	42	GC01M053243	0.520704	https://www.genecards.org/cgi-bin/carddisp.pl?gene=LRP8
LTBP1	Latent Transforming Growth Factor Beta Binding Protein 1	Protein Coding	42	GC02P032991	0.520704	https://www.genecards.org/cgi-bin/carddisp.pl?gene=LTBP1
MIPEP	Mitochondrial Intermediate Peptidase	Protein Coding	42	GC13M023730	0.520704	https://www.genecards.org/cgi-bin/carddisp.pl?gene=MIPEP
MAN2A1	Mannosidase Alpha Class 2A Member 1	Protein Coding	42	GC05P109689	0.520704	https://www.genecards.org/cgi-bin/carddisp.pl?gene=MAN2A1
RAD17	RAD17 Checkpoint Clamp Loader Component	Protein Coding	42	GC05P069369	0.520704	https://www.genecards.org/cgi-bin/carddisp.pl?gene=RAD17
PNKD	PNKD Metallo-Beta-Lactamase Domain Containing	Protein Coding	42	GC02P218270	0.520704	https://www.genecards.org/cgi-bin/carddisp.pl?gene=PNKD
PTPRM	Protein Tyrosine Phosphatase Receptor Type M	Protein Coding	42	GC18P007557	0.520704	https://www.genecards.org/cgi-bin/carddisp.pl?gene=PTPRM
PEX6	Peroxisomal Biogenesis Factor 6	Protein Coding	42	GC06M042963	0.520704	https://www.genecards.org/cgi-bin/carddisp.pl?gene=PEX6
MCFD2	Multiple Coagulation Factor Deficiency 2, ER Cargo Receptor Complex Subunit	Protein Coding	42	GC02M046901	0.520704	https://www.genecards.org/cgi-bin/carddisp.pl?gene=MCFD2
PSMA5	Proteasome 20S Subunit Alpha 5	Protein Coding	42	GC01M109399	0.520704	https://www.genecards.org/cgi-bin/carddisp.pl?gene=PSMA5
PSMD12	Proteasome 26S Subunit, Non-ATPase 12	Protein Coding	42	GC17M067337	0.520704	https://www.genecards.org/cgi-bin/carddisp.pl?gene=PSMD12
UBQLN1	Ubiquilin 1	Protein Coding	42	GC09M083659	0.520704	https://www.genecards.org/cgi-bin/carddisp.pl?gene=UBQLN1
UGCG	UDP-Glucose Ceramide Glucosyltransferase	Protein Coding	42	GC09P111896	0.520704	https://www.genecards.org/cgi-bin/carddisp.pl?gene=UGCG
SORT1	Sortilin 1	Protein Coding	42	GC01M109310	0.520704	https://www.genecards.org/cgi-bin/carddisp.pl?gene=SORT1
SEC31A	SEC31 Homolog A, COPII Coat Complex Component	Protein Coding	42	GC04M082818	0.520704	https://www.genecards.org/cgi-bin/carddisp.pl?gene=SEC31A
RNF5	Ring Finger Protein 5	Protein Coding	42	GC06P061197	0.520704	https://www.genecards.org/cgi-bin/carddisp.pl?gene=RNF5
PSMC5	Proteasome 26S Subunit, ATPase 5	Protein Coding	42	GC17P063827	0.520704	https://www.genecards.org/cgi-bin/carddisp.pl?gene=PSMC5
PLXNA1	Plexin A1	Protein Coding	42	GC03P126988	0.520704	https://www.genecards.org/cgi-bin/carddisp.pl?gene=PLXNA1
PLIN2	Perilipin 2	Protein Coding	42	GC09M019131	0.520704	https://www.genecards.org/cgi-bin/carddisp.pl?gene=PLIN2
SLC7A6	Solute Carrier Family 7 Member 6	Protein Coding	42	GC16P068263	0.520704	https://www.genecards.org/cgi-bin/carddisp.pl?gene=SLC7A6
SGCE	Sarcoglycan Epsilon	Protein Coding	42	GC07M094585	0.520704	https://www.genecards.org/cgi-bin/carddisp.pl?gene=SGCE
VASP	Vasodilator Stimulated Phosphoprotein	Protein Coding	42	GC19P045507	0.520704	https://www.genecards.org/cgi-bin/carddisp.pl?gene=VASP
ZDHHC9	Zinc Finger DHHC-Type Palmitoyltransferase 9	Protein Coding	42	GC0XM129803	0.520704	https://www.genecards.org/cgi-bin/carddisp.pl?gene=ZDHHC9
ZMPSTE24	Zinc Metallopeptidase STE24	Protein Coding	42	GC01P040258	0.520704	https://www.genecards.org/cgi-bin/carddisp.pl?gene=ZMPSTE24
TNFRSF10D	TNF Receptor Superfamily Member 10d	Protein Coding	42	GC08M023135	0.520704	https://www.genecards.org/cgi-bin/carddisp.pl?gene=TNFRSF10D
TUSC3	Tumor Suppressor Candidate 3	Protein Coding	42	GC08P015417	0.520704	https://www.genecards.org/cgi-bin/carddisp.pl?gene=TUSC3
DTYMK	Deoxythymidylate Kinase	Protein Coding	41	GC02M241675	0.520704	https://www.genecards.org/cgi-bin/carddisp.pl?gene=DTYMK
ACP2	Acid Phosphatase 2, Lysosomal	Protein Coding	41	GC11M073845	0.520704	https://www.genecards.org/cgi-bin/carddisp.pl?gene=ACP2
AKR7A2	Aldo-Keto Reductase Family 7 Member A2	Protein Coding	41	GC01M019302	0.520704	https://www.genecards.org/cgi-bin/carddisp.pl?gene=AKR7A2
ALG6	ALG6 Alpha-1,3-Glucosyltransferase	Protein Coding	41	GC01P063367	0.520704	https://www.genecards.org/cgi-bin/carddisp.pl?gene=ALG6
CHST14	Carbohydrate Sulfotransferase 14	Protein Coding	41	GC15P040470	0.520704	https://www.genecards.org/cgi-bin/carddisp.pl?gene=CHST14
CLASP1	Cytoplasmic Linker Associated Protein 1	Protein Coding	41	GC02M121337	0.520704	https://www.genecards.org/cgi-bin/carddisp.pl?gene=CLASP1
ADPGK	ADP Dependent Glucokinase	Protein Coding	41	GC15M072751	0.520704	https://www.genecards.org/cgi-bin/carddisp.pl?gene=ADPGK
CSGALNACT1	Chondroitin Sulfate N-Acetylgalactosaminyltransferase 1	Protein Coding	41	GC08M019404	0.520704	https://www.genecards.org/cgi-bin/carddisp.pl?gene=CSGALNACT1
AREG	Amphiregulin	Protein Coding	41	GC04P074445	0.520704	https://www.genecards.org/cgi-bin/carddisp.pl?gene=AREG
BSCL2	BSCL2 Lipid Droplet Biogenesis Associated, Seipin	Protein Coding	41	GC11M074348	0.520704	https://www.genecards.org/cgi-bin/carddisp.pl?gene=BSCL2
BNIP3L	BCL2 Interacting Protein 3 Like	Protein Coding	41	GC08P026296	0.520704	https://www.genecards.org/cgi-bin/carddisp.pl?gene=BNIP3L
COQ6	Coenzyme Q6, Monooxygenase	Protein Coding	41	GC14P073949	0.520704	https://www.genecards.org/cgi-bin/carddisp.pl?gene=COQ6
ANXA6	Annexin A6	Protein Coding	41	GC05M151100	0.520704	https://www.genecards.org/cgi-bin/carddisp.pl?gene=ANXA6
AP2S1	Adaptor Related Protein Complex 2 Subunit Sigma 1	Protein Coding	41	GC19M046838	0.520704	https://www.genecards.org/cgi-bin/carddisp.pl?gene=AP2S1
IARS2	Isoleucyl-TRNA Synthetase 2, Mitochondrial	Protein Coding	41	GC01P220094	0.520704	https://www.genecards.org/cgi-bin/carddisp.pl?gene=IARS2
IL13RA1	Interleukin 13 Receptor Subunit Alpha 1	Protein Coding	41	GC0XP118727	0.520704	https://www.genecards.org/cgi-bin/carddisp.pl?gene=IL13RA1
IL31RA	Interleukin 31 Receptor A	Protein Coding	41	GC05P055840	0.520704	https://www.genecards.org/cgi-bin/carddisp.pl?gene=IL31RA
CD70	CD70 Molecule	Protein Coding	41	GC19M006590	0.520704	https://www.genecards.org/cgi-bin/carddisp.pl?gene=CD70
ENTPD6	Ectonucleoside Triphosphate Diphosphohydrolase 6	Protein Coding	41	GC20P025196	0.520704	https://www.genecards.org/cgi-bin/carddisp.pl?gene=ENTPD6
ERLIN1	ER Lipid Raft Associated 1	Protein Coding	41	GC10M100150	0.520704	https://www.genecards.org/cgi-bin/carddisp.pl?gene=ERLIN1
HLA-DMB	Major Histocompatibility Complex, Class II, DM Beta	Protein Coding	41	GC06M032934	0.520704	https://www.genecards.org/cgi-bin/carddisp.pl?gene=HLA-DMB
HAVCR1	Hepatitis A Virus Cellular Receptor 1	Protein Coding	41	GC05M157028	0.520704	https://www.genecards.org/cgi-bin/carddisp.pl?gene=HAVCR1
HAX1	HCLS1 Associated Protein X-1	Protein Coding	41	GC01P154273	0.520704	https://www.genecards.org/cgi-bin/carddisp.pl?gene=HAX1
HIBADH	3-Hydroxyisobutyrate Dehydrogenase	Protein Coding	41	GC07M027525	0.520704	https://www.genecards.org/cgi-bin/carddisp.pl?gene=HIBADH
FAM20C	FAM20C Golgi Associated Secretory Pathway Kinase	Protein Coding	41	GC07P000192	0.520704	https://www.genecards.org/cgi-bin/carddisp.pl?gene=FAM20C
GALNT12	Polypeptide N-Acetylgalactosaminyltransferase 12	Protein Coding	41	GC09P098807	0.520704	https://www.genecards.org/cgi-bin/carddisp.pl?gene=GALNT12
GPAA1	Glycosylphosphatidylinositol Anchor Attachment 1	Protein Coding	41	GC08P144082	0.520704	https://www.genecards.org/cgi-bin/carddisp.pl?gene=GPAA1
ORC4	Origin Recognition Complex Subunit 4	Protein Coding	41	GC02M147930	0.520704	https://www.genecards.org/cgi-bin/carddisp.pl?gene=ORC4
MGST1	Microsomal Glutathione S-Transferase 1	Protein Coding	41	GC12P016347	0.520704	https://www.genecards.org/cgi-bin/carddisp.pl?gene=MGST1
MAP4	Microtubule Associated Protein 4	Protein Coding	41	GC03M047850	0.520704	https://www.genecards.org/cgi-bin/carddisp.pl?gene=MAP4
IGFBP4	Insulin Like Growth Factor Binding Protein 4	Protein Coding	41	GC17P040443	0.520704	https://www.genecards.org/cgi-bin/carddisp.pl?gene=IGFBP4
RAB5B	RAB5B, Member RAS Oncogene Family	Protein Coding	41	GC12P055973	0.520704	https://www.genecards.org/cgi-bin/carddisp.pl?gene=RAB5B
PEX10	Peroxisomal Biogenesis Factor 10	Protein Coding	41	GC01M002403	0.520704	https://www.genecards.org/cgi-bin/carddisp.pl?gene=PEX10
PIGO	Phosphatidylinositol Glycan Anchor Biosynthesis Class O	Protein Coding	41	GC09M035088	0.520704	https://www.genecards.org/cgi-bin/carddisp.pl?gene=PIGO
PASK	PAS Domain Containing Serine/Threonine Kinase	Protein Coding	41	GC02M241106	0.520704	https://www.genecards.org/cgi-bin/carddisp.pl?gene=PASK
MYOF	Myoferlin	Protein Coding	41	GC10M093306	0.520704	https://www.genecards.org/cgi-bin/carddisp.pl?gene=MYOF
NAA10	N-Alpha-Acetyltransferase 10, NatA Catalytic Subunit	Protein Coding	41	GC0XM153929	0.520704	https://www.genecards.org/cgi-bin/carddisp.pl?gene=NAA10
MAGED1	MAGE Family Member D1	Protein Coding	41	GC0XP051803	0.520704	https://www.genecards.org/cgi-bin/carddisp.pl?gene=MAGED1
MTHFD1L	Methylenetetrahydrofolate Dehydrogenase (NADP+ Dependent) 1 Like	Protein Coding	41	GC06P150865	0.520704	https://www.genecards.org/cgi-bin/carddisp.pl?gene=MTHFD1L
PTGES	Prostaglandin E Synthase	Protein Coding	41	GC09M129738	0.520704	https://www.genecards.org/cgi-bin/carddisp.pl?gene=PTGES
PSMD11	Proteasome 26S Subunit, Non-ATPase 11	Protein Coding	41	GC17P032444	0.520704	https://www.genecards.org/cgi-bin/carddisp.pl?gene=PSMD11
PTGR1	Prostaglandin Reductase 1	Protein Coding	41	GC09M111549	0.520704	https://www.genecards.org/cgi-bin/carddisp.pl?gene=PTGR1
TMED10	Transmembrane P24 Trafficking Protein 10	Protein Coding	41	GC14M075132	0.520704	https://www.genecards.org/cgi-bin/carddisp.pl?gene=TMED10
SLC23A2	Solute Carrier Family 23 Member 2	Protein Coding	41	GC20M004852	0.520704	https://www.genecards.org/cgi-bin/carddisp.pl?gene=SLC23A2
SARS2	Seryl-TRNA Synthetase 2, Mitochondrial	Protein Coding	41	GC19M051103	0.520704	https://www.genecards.org/cgi-bin/carddisp.pl?gene=SARS2
SEPHS1	Selenophosphate Synthetase 1	Protein Coding	41	GC10M013317	0.520704	https://www.genecards.org/cgi-bin/carddisp.pl?gene=SEPHS1
SLC2A6	Solute Carrier Family 2 Member 6	Protein Coding	41	GC09M133471	0.520704	https://www.genecards.org/cgi-bin/carddisp.pl?gene=SLC2A6
SLC30A5	Solute Carrier Family 30 Member 5	Protein Coding	41	GC05P069093	0.520704	https://www.genecards.org/cgi-bin/carddisp.pl?gene=SLC30A5
SLC35A2	Solute Carrier Family 35 Member A2	Protein Coding	41	GC0XM048903	0.520704	https://www.genecards.org/cgi-bin/carddisp.pl?gene=SLC35A2
SLC38A2	Solute Carrier Family 38 Member 2	Protein Coding	41	GC12M046358	0.520704	https://www.genecards.org/cgi-bin/carddisp.pl?gene=SLC38A2
UBIAD1	UbiA Prenyltransferase Domain Containing 1	Protein Coding	41	GC01P011273	0.520704	https://www.genecards.org/cgi-bin/carddisp.pl?gene=UBIAD1
TPD52	Tumor Protein D52	Protein Coding	41	GC08M079920	0.520704	https://www.genecards.org/cgi-bin/carddisp.pl?gene=TPD52
TREX1	Three Prime Repair Exonuclease 1	Protein Coding	41	GC03P048466	0.520704	https://www.genecards.org/cgi-bin/carddisp.pl?gene=TREX1
SPAG9	Sperm Associated Antigen 9	Protein Coding	41	GC17M050962	0.520704	https://www.genecards.org/cgi-bin/carddisp.pl?gene=SPAG9
RNF8	Ring Finger Protein 8	Protein Coding	41	GC06P061326	0.520704	https://www.genecards.org/cgi-bin/carddisp.pl?gene=RNF8
SERPINE2	Serpin Family E Member 2	Protein Coding	41	GC02M223975	0.520704	https://www.genecards.org/cgi-bin/carddisp.pl?gene=SERPINE2
STX4	Syntaxin 4	Protein Coding	41	GC16P034564	0.520704	https://www.genecards.org/cgi-bin/carddisp.pl?gene=STX4
STX16	Syntaxin 16	Protein Coding	41	GC20P058652	0.520704	https://www.genecards.org/cgi-bin/carddisp.pl?gene=STX16
NPEPPS	Aminopeptidase Puromycin Sensitive	Protein Coding	41	GC17P047522	0.520704	https://www.genecards.org/cgi-bin/carddisp.pl?gene=NPEPPS
VAMP3	Vesicle Associated Membrane Protein 3	Protein Coding	41	GC01P007765	0.520704	https://www.genecards.org/cgi-bin/carddisp.pl?gene=VAMP3
VAMP4	Vesicle Associated Membrane Protein 4	Protein Coding	41	GC01M171700	0.520704	https://www.genecards.org/cgi-bin/carddisp.pl?gene=VAMP4
VAMP7	Vesicle Associated Membrane Protein 7	Protein Coding	41	GC0XP155881	0.520704	https://www.genecards.org/cgi-bin/carddisp.pl?gene=VAMP7
VTI1B	Vesicle Transport Through Interaction With T-SNAREs 1B	Protein Coding	41	GC14M067647	0.520704	https://www.genecards.org/cgi-bin/carddisp.pl?gene=VTI1B
TARBP2	TARBP2 Subunit Of RISC Loading Complex	Protein Coding	41	GC12P053499	0.520704	https://www.genecards.org/cgi-bin/carddisp.pl?gene=TARBP2
WWP1	WW Domain Containing E3 Ubiquitin Protein Ligase 1	Protein Coding	41	GC08P086342	0.520704	https://www.genecards.org/cgi-bin/carddisp.pl?gene=WWP1
DNAJA2	DnaJ Heat Shock Protein Family (Hsp40) Member A2	Protein Coding	40	GC16M046955	0.520704	https://www.genecards.org/cgi-bin/carddisp.pl?gene=DNAJA2
BCAP31	B Cell Receptor Associated Protein 31	Protein Coding	40	GC0XM153701	0.520704	https://www.genecards.org/cgi-bin/carddisp.pl?gene=BCAP31
ABCB10	ATP Binding Cassette Subfamily B Member 10	Protein Coding	40	GC01M229516	0.520704	https://www.genecards.org/cgi-bin/carddisp.pl?gene=ABCB10
BCAM	Basal Cell Adhesion Molecule (Lutheran Blood Group)	Protein Coding	40	GC19P044810	0.520704	https://www.genecards.org/cgi-bin/carddisp.pl?gene=BCAM
CAP1	Cyclase Associated Actin Cytoskeleton Regulatory Protein 1	Protein Coding	40	GC01P040067	0.520704	https://www.genecards.org/cgi-bin/carddisp.pl?gene=CAP1
CALU	Calumenin	Protein Coding	40	GC07P128739	0.520704	https://www.genecards.org/cgi-bin/carddisp.pl?gene=CALU
ABCC10	ATP Binding Cassette Subfamily C Member 10	Protein Coding	40	GC06P043427	0.520704	https://www.genecards.org/cgi-bin/carddisp.pl?gene=ABCC10
AGPAT3	1-Acylglycerol-3-Phosphate O-Acyltransferase 3	Protein Coding	40	GC21P043865	0.520704	https://www.genecards.org/cgi-bin/carddisp.pl?gene=AGPAT3
AK4	Adenylate Kinase 4	Protein Coding	40	GC01P065147	0.520704	https://www.genecards.org/cgi-bin/carddisp.pl?gene=AK4
ANGPT4	Angiopoietin 4	Protein Coding	40	GC20M000869	0.520704	https://www.genecards.org/cgi-bin/carddisp.pl?gene=ANGPT4
ALG14	ALG14 UDP-N-Acetylglucosaminyltransferase Subunit	Protein Coding	40	GC01M094974	0.520704	https://www.genecards.org/cgi-bin/carddisp.pl?gene=ALG14
CHD8	Chromodomain Helicase DNA Binding Protein 8	Protein Coding	40	GC14M021385	0.520704	https://www.genecards.org/cgi-bin/carddisp.pl?gene=CHD8
COG2	Component Of Oligomeric Golgi Complex 2	Protein Coding	40	GC01P230642	0.520704	https://www.genecards.org/cgi-bin/carddisp.pl?gene=COG2
CDH17	Cadherin 17	Protein Coding	40	GC08M094127	0.520704	https://www.genecards.org/cgi-bin/carddisp.pl?gene=CDH17
CCNT1	Cyclin T1	Protein Coding	40	GC12M048688	0.520704	https://www.genecards.org/cgi-bin/carddisp.pl?gene=CCNT1
COTL1	Coactosin Like F-Actin Binding Protein 1	Protein Coding	40	GC16M084566	0.520704	https://www.genecards.org/cgi-bin/carddisp.pl?gene=COTL1
GPR39	G Protein-Coupled Receptor 39	Protein Coding	40	GC02P134436	0.520704	https://www.genecards.org/cgi-bin/carddisp.pl?gene=GPR39
GPX8	Glutathione Peroxidase 8 (Putative)	Protein Coding	40	GC05P055160	0.520704	https://www.genecards.org/cgi-bin/carddisp.pl?gene=GPX8
KIF5C	Kinesin Family Member 5C	Protein Coding	40	GC02P148875	0.520704	https://www.genecards.org/cgi-bin/carddisp.pl?gene=KIF5C
ELMO2	Engulfment And Cell Motility 2	Protein Coding	40	GC20M046366	0.520704	https://www.genecards.org/cgi-bin/carddisp.pl?gene=ELMO2
EPN1	Epsin 1	Protein Coding	40	GC19P057783	0.520704	https://www.genecards.org/cgi-bin/carddisp.pl?gene=EPN1
CELSR2	Cadherin EGF LAG Seven-Pass G-Type Receptor 2	Protein Coding	40	GC01P109250	0.520704	https://www.genecards.org/cgi-bin/carddisp.pl?gene=CELSR2
DEGS1	Delta 4-Desaturase, Sphingolipid 1	Protein Coding	40	GC01P224175	0.520704	https://www.genecards.org/cgi-bin/carddisp.pl?gene=DEGS1
HMGN1	High Mobility Group Nucleosome Binding Domain 1	Protein Coding	40	GC21M039342	0.520704	https://www.genecards.org/cgi-bin/carddisp.pl?gene=HMGN1
HSPE1	Heat Shock Protein Family E (Hsp10) Member 1	Protein Coding	40	GC02P197501	0.520704	https://www.genecards.org/cgi-bin/carddisp.pl?gene=HSPE1
HPCAL1	Hippocalcin Like 1	Protein Coding	40	GC02P010302	0.520704	https://www.genecards.org/cgi-bin/carddisp.pl?gene=HPCAL1
HSD17B8	Hydroxysteroid 17-Beta Dehydrogenase 8	Protein Coding	40	GC06P061224	0.520704	https://www.genecards.org/cgi-bin/carddisp.pl?gene=HSD17B8
ELOVL6	ELOVL Fatty Acid Elongase 6	Protein Coding	40	GC04M110045	0.520704	https://www.genecards.org/cgi-bin/carddisp.pl?gene=ELOVL6
GALNT10	Polypeptide N-Acetylgalactosaminyltransferase 10	Protein Coding	40	GC05P154165	0.520704	https://www.genecards.org/cgi-bin/carddisp.pl?gene=GALNT10
LEMD3	LEM Domain Containing 3	Protein Coding	40	GC12P065169	0.520704	https://www.genecards.org/cgi-bin/carddisp.pl?gene=LEMD3
L2HGDH	L-2-Hydroxyglutarate Dehydrogenase	Protein Coding	40	GC14M050237	0.520704	https://www.genecards.org/cgi-bin/carddisp.pl?gene=L2HGDH
NEO1	Neogenin 1	Protein Coding	40	GC15P073051	0.520704	https://www.genecards.org/cgi-bin/carddisp.pl?gene=NEO1
NLRX1	NLR Family Member X1	Protein Coding	40	GC11P119166	0.520704	https://www.genecards.org/cgi-bin/carddisp.pl?gene=NLRX1
NTS	Neurotensin	Protein Coding	40	GC12P085876	0.520704	https://www.genecards.org/cgi-bin/carddisp.pl?gene=NTS
NT5C3A	5'-Nucleotidase, Cytosolic IIIA	Protein Coding	40	GC07M033014	0.520704	https://www.genecards.org/cgi-bin/carddisp.pl?gene=NT5C3A
NCAPD3	Non-SMC Condensin II Complex Subunit D3	Protein Coding	40	GC11M134150	0.520704	https://www.genecards.org/cgi-bin/carddisp.pl?gene=NCAPD3
NUP93	Nucleoporin 93	Protein Coding	40	GC16P056813	0.520704	https://www.genecards.org/cgi-bin/carddisp.pl?gene=NUP93
POLD3	DNA Polymerase Delta 3, Accessory Subunit	Protein Coding	40	GC11P074526	0.520704	https://www.genecards.org/cgi-bin/carddisp.pl?gene=POLD3
PPA2	Inorganic Pyrophosphatase 2	Protein Coding	40	GC04M105369	0.520704	https://www.genecards.org/cgi-bin/carddisp.pl?gene=PPA2
MRC2	Mannose Receptor C Type 2	Protein Coding	40	GC17P062627	0.520704	https://www.genecards.org/cgi-bin/carddisp.pl?gene=MRC2
LRBA	LPS Responsive Beige-Like Anchor Protein	Protein Coding	40	GC04M150264	0.520704	https://www.genecards.org/cgi-bin/carddisp.pl?gene=LRBA
LRP12	LDL Receptor Related Protein 12	Protein Coding	40	GC08M104489	0.520704	https://www.genecards.org/cgi-bin/carddisp.pl?gene=LRP12
MARCKS	Myristoylated Alanine Rich Protein Kinase C Substrate	Protein Coding	40	GC06P113857	0.520704	https://www.genecards.org/cgi-bin/carddisp.pl?gene=MARCKS
LSR	Lipolysis Stimulated Lipoprotein Receptor	Protein Coding	40	GC19P042454	0.520704	https://www.genecards.org/cgi-bin/carddisp.pl?gene=LSR
MAZ	MYC Associated Zinc Finger Protein	Protein Coding	40	GC16P029806	0.520704	https://www.genecards.org/cgi-bin/carddisp.pl?gene=MAZ
MCM3AP	Minichromosome Maintenance Complex Component 3 Associated Protein	Protein Coding	40	GC21M046235	0.520704	https://www.genecards.org/cgi-bin/carddisp.pl?gene=MCM3AP
RAB31	RAB31, Member RAS Oncogene Family	Protein Coding	40	GC18P009701	0.520704	https://www.genecards.org/cgi-bin/carddisp.pl?gene=RAB31
PPIC	Peptidylprolyl Isomerase C	Protein Coding	40	GC05M123023	0.520704	https://www.genecards.org/cgi-bin/carddisp.pl?gene=PPIC
PPA1	Inorganic Pyrophosphatase 1	Protein Coding	40	GC10M070202	0.520704	https://www.genecards.org/cgi-bin/carddisp.pl?gene=PPA1
PDLIM1	PDZ And LIM Domain 1	Protein Coding	40	GC10M095237	0.520704	https://www.genecards.org/cgi-bin/carddisp.pl?gene=PDLIM1
PI4K2A	Phosphatidylinositol 4-Kinase Type 2 Alpha	Protein Coding	40	GC10P097640	0.520704	https://www.genecards.org/cgi-bin/carddisp.pl?gene=PI4K2A
PEG10	Paternally Expressed 10	Protein Coding	40	GC07P094656	0.520704	https://www.genecards.org/cgi-bin/carddisp.pl?gene=PEG10
PEX13	Peroxisomal Biogenesis Factor 13	Protein Coding	40	GC02P061017	0.520704	https://www.genecards.org/cgi-bin/carddisp.pl?gene=PEX13
LTBR	Lymphotoxin Beta Receptor	Protein Coding	40	GC12P006375	0.520704	https://www.genecards.org/cgi-bin/carddisp.pl?gene=LTBR
TAX1BP1	Tax1 Binding Protein 1	Protein Coding	40	GC07P027739	0.520704	https://www.genecards.org/cgi-bin/carddisp.pl?gene=TAX1BP1
PSMC2	Proteasome 26S Subunit, ATPase 2	Protein Coding	40	GC07P103344	0.520704	https://www.genecards.org/cgi-bin/carddisp.pl?gene=PSMC2
SNX1	Sorting Nexin 1	Protein Coding	40	GC15P064094	0.520704	https://www.genecards.org/cgi-bin/carddisp.pl?gene=SNX1
SLC30A1	Solute Carrier Family 30 Member 1	Protein Coding	40	GC01M211571	0.520704	https://www.genecards.org/cgi-bin/carddisp.pl?gene=SLC30A1
SCAP	SREBF Chaperone	Protein Coding	40	GC03M047413	0.520704	https://www.genecards.org/cgi-bin/carddisp.pl?gene=SCAP
SLC35A1	Solute Carrier Family 35 Member A1	Protein Coding	40	GC06P087470	0.520704	https://www.genecards.org/cgi-bin/carddisp.pl?gene=SLC35A1
TNIP1	TNFAIP3 Interacting Protein 1	Protein Coding	40	GC05M151029	0.520704	https://www.genecards.org/cgi-bin/carddisp.pl?gene=TNIP1
TSN	Translin	Protein Coding	40	GC02P121737	0.520704	https://www.genecards.org/cgi-bin/carddisp.pl?gene=TSN
TIMM17A	Translocase Of Inner Mitochondrial Membrane 17A	Protein Coding	40	GC01P201955	0.520704	https://www.genecards.org/cgi-bin/carddisp.pl?gene=TIMM17A
SS18	SS18 Subunit Of BAF Chromatin Remodeling Complex	Protein Coding	40	GC18M026016	0.520704	https://www.genecards.org/cgi-bin/carddisp.pl?gene=SS18
STEAP2	STEAP2 Metalloreductase	Protein Coding	40	GC07P090167	0.520704	https://www.genecards.org/cgi-bin/carddisp.pl?gene=STEAP2
RHBDF2	Rhomboid 5 Homolog 2	Protein Coding	40	GC17M076470	0.520704	https://www.genecards.org/cgi-bin/carddisp.pl?gene=RHBDF2
RBPMS	RNA Binding Protein, MRNA Processing Factor	Protein Coding	40	GC08P030361	0.520704	https://www.genecards.org/cgi-bin/carddisp.pl?gene=RBPMS
PLXND1	Plexin D1	Protein Coding	40	GC03M129555	0.520704	https://www.genecards.org/cgi-bin/carddisp.pl?gene=PLXND1
PLEKHG4	Pleckstrin Homology And RhoGEF Domain Containing G4	Protein Coding	40	GC16P067277	0.520704	https://www.genecards.org/cgi-bin/carddisp.pl?gene=PLEKHG4
ST8SIA4	ST8 Alpha-N-Acetyl-Neuraminide Alpha-2,8-Sialyltransferase 4	Protein Coding	40	GC05M100806	0.520704	https://www.genecards.org/cgi-bin/carddisp.pl?gene=ST8SIA4
STRA6	Signaling Receptor And Transporter Of Retinol STRA6	Protein Coding	40	GC15M074179	0.520704	https://www.genecards.org/cgi-bin/carddisp.pl?gene=STRA6
SLC4A10	Solute Carrier Family 4 Member 10	Protein Coding	40	GC02P161425	0.520704	https://www.genecards.org/cgi-bin/carddisp.pl?gene=SLC4A10
SMCHD1	Structural Maintenance Of Chromosomes Flexible Hinge Domain Containing 1	Protein Coding	40	GC18P002649	0.520704	https://www.genecards.org/cgi-bin/carddisp.pl?gene=SMCHD1
SGCB	Sarcoglycan Beta	Protein Coding	40	GC04M052019	0.520704	https://www.genecards.org/cgi-bin/carddisp.pl?gene=SGCB
PLIN3	Perilipin 3	Protein Coding	40	GC19M004839	0.520704	https://www.genecards.org/cgi-bin/carddisp.pl?gene=PLIN3
NLN	Neurolysin	Protein Coding	40	GC05P065722	0.520704	https://www.genecards.org/cgi-bin/carddisp.pl?gene=NLN
VPS13A	Vacuolar Protein Sorting 13 Homolog A	Protein Coding	40	GC09P077177	0.520704	https://www.genecards.org/cgi-bin/carddisp.pl?gene=VPS13A
WBP2	WW Domain Binding Protein 2	Protein Coding	40	GC17M075845	0.520704	https://www.genecards.org/cgi-bin/carddisp.pl?gene=WBP2
ZNF148	Zinc Finger Protein 148	Protein Coding	40	GC03M125225	0.520704	https://www.genecards.org/cgi-bin/carddisp.pl?gene=ZNF148
ZBTB20	Zinc Finger And BTB Domain Containing 20	Protein Coding	40	GC03M114315	0.520704	https://www.genecards.org/cgi-bin/carddisp.pl?gene=ZBTB20
WDFY3	WD Repeat And FYVE Domain Containing 3	Protein Coding	40	GC04M084669	0.520704	https://www.genecards.org/cgi-bin/carddisp.pl?gene=WDFY3
DAGLB	Diacylglycerol Lipase Beta	Protein Coding	39	GC07M006416	0.520704	https://www.genecards.org/cgi-bin/carddisp.pl?gene=DAGLB
EGFL7	EGF Like Domain Multiple 7	Protein Coding	39	GC09P136658	0.520704	https://www.genecards.org/cgi-bin/carddisp.pl?gene=EGFL7
EIF2A	Eukaryotic Translation Initiation Factor 2A	Protein Coding	39	GC03P150546	0.520704	https://www.genecards.org/cgi-bin/carddisp.pl?gene=EIF2A
AGMAT	Agmatinase	Protein Coding	39	GC01M015571	0.520704	https://www.genecards.org/cgi-bin/carddisp.pl?gene=AGMAT
CLASP2	Cytoplasmic Linker Associated Protein 2	Protein Coding	39	GC03M033537	0.520704	https://www.genecards.org/cgi-bin/carddisp.pl?gene=CLASP2
CERS2	Ceramide Synthase 2	Protein Coding	39	GC01M150934	0.520704	https://www.genecards.org/cgi-bin/carddisp.pl?gene=CERS2
ATP8B1	ATPase Phospholipid Transporting 8B1	Protein Coding	39	GC18M057646	0.520704	https://www.genecards.org/cgi-bin/carddisp.pl?gene=ATP8B1
AP2A1	Adaptor Related Protein Complex 2 Subunit Alpha 1	Protein Coding	39	GC19P049858	0.520704	https://www.genecards.org/cgi-bin/carddisp.pl?gene=AP2A1
HTATIP2	HIV-1 Tat Interactive Protein 2	Protein Coding	39	GC11P020363	0.520704	https://www.genecards.org/cgi-bin/carddisp.pl?gene=HTATIP2
HERPUD1	Homocysteine Inducible ER Protein With Ubiquitin Like Domain 1	Protein Coding	39	GC16P056931	0.520704	https://www.genecards.org/cgi-bin/carddisp.pl?gene=HERPUD1
GGT7	Gamma-Glutamyltransferase 7	Protein Coding	39	GC20M034844	0.520704	https://www.genecards.org/cgi-bin/carddisp.pl?gene=GGT7
EPN2	Epsin 2	Protein Coding	39	GC17P019215	0.520704	https://www.genecards.org/cgi-bin/carddisp.pl?gene=EPN2
CD99	CD99 Molecule (Xg Blood Group)	Protein Coding	39	GC0XP002691	0.520704	https://www.genecards.org/cgi-bin/carddisp.pl?gene=CD99
CDH16	Cadherin 16	Protein Coding	39	GC16M066908	0.520704	https://www.genecards.org/cgi-bin/carddisp.pl?gene=CDH16
CYBRD1	Cytochrome B Reductase 1	Protein Coding	39	GC02P171522	0.520704	https://www.genecards.org/cgi-bin/carddisp.pl?gene=CYBRD1
HNRNPM	Heterogeneous Nuclear Ribonucleoprotein M	Protein Coding	39	GC19P008444	0.520704	https://www.genecards.org/cgi-bin/carddisp.pl?gene=HNRNPM
HDGF	Heparin Binding Growth Factor	Protein Coding	39	GC01M156822	0.520704	https://www.genecards.org/cgi-bin/carddisp.pl?gene=HDGF
FAT1	FAT Atypical Cadherin 1	Protein Coding	39	GC04M186587	0.520704	https://www.genecards.org/cgi-bin/carddisp.pl?gene=FAT1
ELF3	E74 Like ETS Transcription Factor 3	Protein Coding	39	GC01P202007	0.520704	https://www.genecards.org/cgi-bin/carddisp.pl?gene=ELF3
GALNT1	Polypeptide N-Acetylgalactosaminyltransferase 1	Protein Coding	39	GC18P035581	0.520704	https://www.genecards.org/cgi-bin/carddisp.pl?gene=GALNT1
LGR4	Leucine Rich Repeat Containing G Protein-Coupled Receptor 4	Protein Coding	39	GC11M027365	0.520704	https://www.genecards.org/cgi-bin/carddisp.pl?gene=LGR4
OPN3	Opsin 3	Protein Coding	39	GC01M241590	0.520704	https://www.genecards.org/cgi-bin/carddisp.pl?gene=OPN3
MPZL1	Myelin Protein Zero Like 1	Protein Coding	39	GC01P167721	0.520704	https://www.genecards.org/cgi-bin/carddisp.pl?gene=MPZL1
NOVA1	NOVA Alternative Splicing Regulator 1	Protein Coding	39	GC14M026443	0.520704	https://www.genecards.org/cgi-bin/carddisp.pl?gene=NOVA1
MGRN1	Mahogunin Ring Finger 1	Protein Coding	39	GC16P006897	0.520704	https://www.genecards.org/cgi-bin/carddisp.pl?gene=MGRN1
LRRC8A	Leucine Rich Repeat Containing 8 VRAC Subunit A	Protein Coding	39	GC09P128882	0.520704	https://www.genecards.org/cgi-bin/carddisp.pl?gene=LRRC8A
RAB3D	RAB3D, Member RAS Oncogene Family	Protein Coding	39	GC19M011322	0.520704	https://www.genecards.org/cgi-bin/carddisp.pl?gene=RAB3D
RAB9A	RAB9A, Member RAS Oncogene Family	Protein Coding	39	GC0XP013707	0.520704	https://www.genecards.org/cgi-bin/carddisp.pl?gene=RAB9A
NDUFB11	NADH:Ubiquinone Oxidoreductase Subunit B11	Protein Coding	39	GC0XM047142	0.520704	https://www.genecards.org/cgi-bin/carddisp.pl?gene=NDUFB11
MAFG	MAF BZIP Transcription Factor G	Protein Coding	39	GC17M081918	0.520704	https://www.genecards.org/cgi-bin/carddisp.pl?gene=MAFG
MAGT1	Magnesium Transporter 1	Protein Coding	39	GC0XM077854	0.520704	https://www.genecards.org/cgi-bin/carddisp.pl?gene=MAGT1
TAF4	TATA-Box Binding Protein Associated Factor 4	Protein Coding	39	GC20M062012	0.520704	https://www.genecards.org/cgi-bin/carddisp.pl?gene=TAF4
TCTN3	Tectonic Family Member 3	Protein Coding	39	GC10M095663	0.520704	https://www.genecards.org/cgi-bin/carddisp.pl?gene=TCTN3
SEC23IP	SEC23 Interacting Protein	Protein Coding	39	GC10P119892	0.520704	https://www.genecards.org/cgi-bin/carddisp.pl?gene=SEC23IP
SLC16A4	Solute Carrier Family 16 Member 4	Protein Coding	39	GC01M110362	0.520704	https://www.genecards.org/cgi-bin/carddisp.pl?gene=SLC16A4
TKFC	Triokinase And FMN Cyclase	Protein Coding	39	GC11P061334	0.520704	https://www.genecards.org/cgi-bin/carddisp.pl?gene=TKFC
SPG11	SPG11 Vesicle Trafficking Associated, Spatacsin	Protein Coding	39	GC15M044562	0.520704	https://www.genecards.org/cgi-bin/carddisp.pl?gene=SPG11
RIF1	Replication Timing Regulatory Factor 1	Protein Coding	39	GC02P151409	0.520704	https://www.genecards.org/cgi-bin/carddisp.pl?gene=RIF1
RNF19A	Ring Finger Protein 19A, RBR E3 Ubiquitin Protein Ligase	Protein Coding	39	GC08M100257	0.520704	https://www.genecards.org/cgi-bin/carddisp.pl?gene=RNF19A
RNPEP	Arginyl Aminopeptidase	Protein Coding	39	GC01P201982	0.520704	https://www.genecards.org/cgi-bin/carddisp.pl?gene=RNPEP
STX5	Syntaxin 5	Protein Coding	39	GC11M062806	0.520704	https://www.genecards.org/cgi-bin/carddisp.pl?gene=STX5
SGPP1	Sphingosine-1-Phosphate Phosphatase 1	Protein Coding	39	GC14M063684	0.520704	https://www.genecards.org/cgi-bin/carddisp.pl?gene=SGPP1
VPS45	Vacuolar Protein Sorting 45 Homolog	Protein Coding	39	GC01P150068	0.520704	https://www.genecards.org/cgi-bin/carddisp.pl?gene=VPS45
NCOA4	Nuclear Receptor Coactivator 4	Protein Coding	39	GC10M046005	0.520704	https://www.genecards.org/cgi-bin/carddisp.pl?gene=NCOA4
YKT6	YKT6 V-SNARE Homolog	Protein Coding	39	GC07P044200	0.520704	https://www.genecards.org/cgi-bin/carddisp.pl?gene=YKT6
DDX39B	DExD-Box Helicase 39B	Protein Coding	38	GC06M031530	0.520704	https://www.genecards.org/cgi-bin/carddisp.pl?gene=DDX39B
DYNC2H1	Dynein Cytoplasmic 2 Heavy Chain 1	Protein Coding	38	GC11P103109	0.520704	https://www.genecards.org/cgi-bin/carddisp.pl?gene=DYNC2H1
DOLK	Dolichol Kinase	Protein Coding	38	GC09M128945	0.520704	https://www.genecards.org/cgi-bin/carddisp.pl?gene=DOLK
DTNB	Dystrobrevin Beta	Protein Coding	38	GC02M025378	0.520704	https://www.genecards.org/cgi-bin/carddisp.pl?gene=DTNB
ACAD10	Acyl-CoA Dehydrogenase Family Member 10	Protein Coding	38	GC12P111686	0.520704	https://www.genecards.org/cgi-bin/carddisp.pl?gene=ACAD10
CAPRIN1	Cell Cycle Associated Protein 1	Protein Coding	38	GC11P034051	0.520704	https://www.genecards.org/cgi-bin/carddisp.pl?gene=CAPRIN1
BAG4	BAG Cochaperone 4	Protein Coding	38	GC08P038176	0.520704	https://www.genecards.org/cgi-bin/carddisp.pl?gene=BAG4
ALG13	ALG13 UDP-N-Acetylglucosaminyltransferase Subunit	Protein Coding	38	GC0XP111665	0.520704	https://www.genecards.org/cgi-bin/carddisp.pl?gene=ALG13
ADGRG6	Adhesion G Protein-Coupled Receptor G6	Protein Coding	38	GC06P142301	0.520704	https://www.genecards.org/cgi-bin/carddisp.pl?gene=ADGRG6
CLDN12	Claudin 12	Protein Coding	38	GC07P090383	0.520704	https://www.genecards.org/cgi-bin/carddisp.pl?gene=CLDN12
CLINT1	Clathrin Interactor 1	Protein Coding	38	GC05M157785	0.520704	https://www.genecards.org/cgi-bin/carddisp.pl?gene=CLINT1
COG7	Component Of Oligomeric Golgi Complex 7	Protein Coding	38	GC16M023388	0.520704	https://www.genecards.org/cgi-bin/carddisp.pl?gene=COG7
CRIM1	Cysteine Rich Transmembrane BMP Regulator 1	Protein Coding	38	GC02P036355	0.520704	https://www.genecards.org/cgi-bin/carddisp.pl?gene=CRIM1
ARFGEF1	ADP Ribosylation Factor Guanine Nucleotide Exchange Factor 1	Protein Coding	38	GC08M067173	0.520704	https://www.genecards.org/cgi-bin/carddisp.pl?gene=ARFGEF1
B3GALT6	Beta-1,3-Galactosyltransferase 6	Protein Coding	38	GC01P001232	0.520704	https://www.genecards.org/cgi-bin/carddisp.pl?gene=B3GALT6
ATP8B2	ATPase Phospholipid Transporting 8B2	Protein Coding	38	GC01P154325	0.520704	https://www.genecards.org/cgi-bin/carddisp.pl?gene=ATP8B2
ADGRE5	Adhesion G Protein-Coupled Receptor E5	Protein Coding	38	GC19P014381	0.520704	https://www.genecards.org/cgi-bin/carddisp.pl?gene=ADGRE5
ADGRG1	Adhesion G Protein-Coupled Receptor G1	Protein Coding	38	GC16P057610	0.520704	https://www.genecards.org/cgi-bin/carddisp.pl?gene=ADGRG1
IL1F10	Interleukin 1 Family Member 10	Protein Coding	38	GC02P113067	0.520704	https://www.genecards.org/cgi-bin/carddisp.pl?gene=IL1F10
KIAA0319	KIAA0319	Protein Coding	38	GC06M024544	0.520704	https://www.genecards.org/cgi-bin/carddisp.pl?gene=KIAA0319
CSDE1	Cold Shock Domain Containing E1	Protein Coding	38	GC01M114716	0.520704	https://www.genecards.org/cgi-bin/carddisp.pl?gene=CSDE1
CDKAL1	CDK5 Regulatory Subunit Associated Protein 1 Like 1	Protein Coding	38	GC06P020534	0.520704	https://www.genecards.org/cgi-bin/carddisp.pl?gene=CDKAL1
DCBLD2	Discoidin, CUB And LCCL Domain Containing 2	Protein Coding	38	GC03M098795	0.520704	https://www.genecards.org/cgi-bin/carddisp.pl?gene=DCBLD2
EXTL2	Exostosin Like Glycosyltransferase 2	Protein Coding	38	GC01M100872	0.520704	https://www.genecards.org/cgi-bin/carddisp.pl?gene=EXTL2
GLCE	Glucuronic Acid Epimerase	Protein Coding	38	GC15P080618	0.520704	https://www.genecards.org/cgi-bin/carddisp.pl?gene=GLCE
GORASP2	Golgi Reassembly Stacking Protein 2	Protein Coding	38	GC02P170928	0.520704	https://www.genecards.org/cgi-bin/carddisp.pl?gene=GORASP2
HPS6	HPS6 Biogenesis Of Lysosomal Organelles Complex 2 Subunit 3	Protein Coding	38	GC10P102065	0.520704	https://www.genecards.org/cgi-bin/carddisp.pl?gene=HPS6
FKBP3	FKBP Prolyl Isomerase 3	Protein Coding	38	GC14M045115	0.520704	https://www.genecards.org/cgi-bin/carddisp.pl?gene=FKBP3
GOSR1	Golgi SNAP Receptor Complex Member 1	Protein Coding	38	GC17P030477	0.520704	https://www.genecards.org/cgi-bin/carddisp.pl?gene=GOSR1
GCNT3	Glucosaminyl (N-Acetyl) Transferase 3, Mucin Type	Protein Coding	38	GC15P059594	0.520704	https://www.genecards.org/cgi-bin/carddisp.pl?gene=GCNT3
OPA3	Outer Mitochondrial Membrane Lipid Metabolism Regulator OPA3	Protein Coding	38	GC19M045527	0.520704	https://www.genecards.org/cgi-bin/carddisp.pl?gene=OPA3
NUBP2	Nucleotide Binding Protein 2	Protein Coding	38	GC16P001782	0.520704	https://www.genecards.org/cgi-bin/carddisp.pl?gene=NUBP2
NUBPL	Nucleotide Binding Protein Like	Protein Coding	38	GC14P031489	0.520704	https://www.genecards.org/cgi-bin/carddisp.pl?gene=NUBPL
NCAPG2	Non-SMC Condensin II Complex Subunit G2	Protein Coding	38	GC07M158631	0.520704	https://www.genecards.org/cgi-bin/carddisp.pl?gene=NCAPG2
NPLOC4	NPL4 Homolog, Ubiquitin Recognition Factor	Protein Coding	38	GC17M081556	0.520704	https://www.genecards.org/cgi-bin/carddisp.pl?gene=NPLOC4
PDS5A	PDS5 Cohesin Associated Factor A	Protein Coding	38	GC04M039824	0.520704	https://www.genecards.org/cgi-bin/carddisp.pl?gene=PDS5A
MICA	MHC Class I Polypeptide-Related Sequence A	Protein Coding	38	GC06P031399	0.520704	https://www.genecards.org/cgi-bin/carddisp.pl?gene=MICA
LMCD1	LIM And Cysteine Rich Domains 1	Protein Coding	38	GC03P008520	0.520704	https://www.genecards.org/cgi-bin/carddisp.pl?gene=LMCD1
MYEF2	Myelin Expression Factor 2	Protein Coding	38	GC15M048134	0.520704	https://www.genecards.org/cgi-bin/carddisp.pl?gene=MYEF2
MUL1	Mitochondrial E3 Ubiquitin Protein Ligase 1	Protein Coding	38	GC01M020499	0.520704	https://www.genecards.org/cgi-bin/carddisp.pl?gene=MUL1
RBM5	RNA Binding Motif Protein 5	Protein Coding	38	GC03P050163	0.520704	https://www.genecards.org/cgi-bin/carddisp.pl?gene=RBM5
RBFOX2	RNA Binding Fox-1 Homolog 2	Protein Coding	38	GC22M035738	0.520704	https://www.genecards.org/cgi-bin/carddisp.pl?gene=RBFOX2
MBNL1	Muscleblind Like Splicing Regulator 1	Protein Coding	38	GC03P152243	0.520704	https://www.genecards.org/cgi-bin/carddisp.pl?gene=MBNL1
SYMPK	Symplekin	Protein Coding	38	GC19M045815	0.520704	https://www.genecards.org/cgi-bin/carddisp.pl?gene=SYMPK
TBCB	Tubulin Folding Cofactor B	Protein Coding	38	GC19P042488	0.520704	https://www.genecards.org/cgi-bin/carddisp.pl?gene=TBCB
TBCE	Tubulin Folding Cofactor E	Protein Coding	38	GC01P235374	0.520704	https://www.genecards.org/cgi-bin/carddisp.pl?gene=TBCE
SNX2	Sorting Nexin 2	Protein Coding	38	GC05P122774	0.520704	https://www.genecards.org/cgi-bin/carddisp.pl?gene=SNX2
TACO1	Translational Activator Of Cytochrome C Oxidase I	Protein Coding	38	GC17P063600	0.520704	https://www.genecards.org/cgi-bin/carddisp.pl?gene=TACO1
SLC15A4	Solute Carrier Family 15 Member 4	Protein Coding	38	GC12M128793	0.520704	https://www.genecards.org/cgi-bin/carddisp.pl?gene=SLC15A4
SCAMP2	Secretory Carrier Membrane Protein 2	Protein Coding	38	GC15M074843	0.520704	https://www.genecards.org/cgi-bin/carddisp.pl?gene=SCAMP2
SCAMP1	Secretory Carrier Membrane Protein 1	Protein Coding	38	GC05P078360	0.520704	https://www.genecards.org/cgi-bin/carddisp.pl?gene=SCAMP1
SCARA5	Scavenger Receptor Class A Member 5	Protein Coding	38	GC08M027869	0.520704	https://www.genecards.org/cgi-bin/carddisp.pl?gene=SCARA5
[truncated: 573 more rows]
