# Supplementary material for: Luteolin Potentially Treating Prostate Cancer and COVID-19 Analyzed by the Bioinformatics Approach: Clinical Findings and Drug Targets
Source: Front Endocrinol (Lausanne). 2022 Feb 1;12:802447. doi: 10.3389/fendo.2021.802447 (PMC8844187; doi:10.3389/fendo.2021.802447)
Supplement: Supplementary file 6 [file Table_6.xlsx]

## Sheet: Sheet1
tax_id	Org_name	GeneID	CurrentID	Status	Symbol	Aliases	description	other_designations	map_location	chromosome	genomic_nucleotide_accession.version	start_position_on_the_genomic_accession	end_position_on_the_genomic_accession	orientation	exon_count	OMIM
2697049	Severe acute respiratory syndrome coronavirus 2	43740568	0	live	S	GU280_gp02, spike glycoprotein	surface glycoprotein	surface glycoprotein			NC_045512.2	21563	25384	plus	0
2697049	Severe acute respiratory syndrome coronavirus 2	43740578	0	live	ORF1ab	GU280_gp01	ORF1a polyprotein;ORF1ab polyprotein	ORF1a polyprotein;ORF1ab polyprotein			NC_045512.2	266	21555	plus	0
2697049	Severe acute respiratory syndrome coronavirus 2	43740575	0	live	N	GU280_gp10	nucleocapsid phosphoprotein	nucleocapsid phosphoprotein			NC_045512.2	28274	29533	plus	0
2697049	Severe acute respiratory syndrome coronavirus 2	43740577	0	live	ORF8	GU280_gp09	ORF8 protein	ORF8 protein			NC_045512.2	27894	28259	plus	0
2697049	Severe acute respiratory syndrome coronavirus 2	43740570	0	live	E	GU280_gp04	envelope protein	envelope protein			NC_045512.2	26245	26472	plus	0
2697049	Severe acute respiratory syndrome coronavirus 2	43740571	0	live	M	GU280_gp05	membrane glycoprotein	membrane glycoprotein			NC_045512.2	26523	27191	plus	0
2697049	Severe acute respiratory syndrome coronavirus 2	43740569	0	live	ORF3a	GU280_gp03	ORF3a protein	ORF3a protein			NC_045512.2	25393	26220	plus	0
2697049	Severe acute respiratory syndrome coronavirus 2	43740573	0	live	ORF7a	GU280_gp07	ORF7a protein	ORF7a protein			NC_045512.2	27394	27759	plus	0
2697049	Severe acute respiratory syndrome coronavirus 2	43740572	0	live	ORF6	GU280_gp06	ORF6 protein	ORF6 protein			NC_045512.2	27202	27387	plus	0
2697049	Severe acute respiratory syndrome coronavirus 2	43562271	0	live	NEWENTRY		Record to support submission of GeneRIFs for a gene not in Gene (COVID-19; COVID-19 virus; COVID19; HCoV-19; Human coronavirus 2019; SARS-2; SARS-CoV2; SARS2; Wuhan coronavirus).
2697049	Severe acute respiratory syndrome coronavirus 2	43740576	0	live	ORF10	GU280_gp11	ORF10 protein	ORF10 protein			NC_045512.2	29558	29674	plus	0
2697049	Severe acute respiratory syndrome coronavirus 2	43740574	0	live	ORF7b	GU280_gp08	ORF7b	ORF7b			NC_045512.2	27756	27887	plus	0
9606	Homo sapiens	51284	0	live	TLR7	IMD74-like, TLR7	toll like receptor 7	toll-like receptor 7|toll-like receptor 7-like	Xp22.2	X	NC_000023.11	12867072	12890361	plus	3	300365
9606	Homo sapiens	3569	0	live	IL6	BSF-2, BSF2, CDF, HGF, HSF, IFN-beta-2, IFNB2, IL-6	interleukin 6	interleukin-6|B-cell differentiation factor|B-cell stimulatory factor 2|CTL differentiation factor|hybridoma growth factor|interferon beta-2|interleukin BSF-2	7p15.3	7	NC_000007.14	22725889	22732002	plus	6	147620
9606	Homo sapiens	3586	0	live	IL10	CSIF, GVHDS, IL-10A, TGIF, IL10	interleukin 10	interleukin-10|T-cell growth inhibitory factor|cytokine synthesis inhibitory factor	1q32.1	1	NC_000001.11	206767602	206772494	minus	7	124092
9606	Homo sapiens	1636	0	live	ACE	ACE1, CD143, DCP, DCP1	angiotensin I converting enzyme	angiotensin-converting enzyme|CD143 antigen|angiotensin I converting enzyme (peptidyl-dipeptidase A) 1|carboxycathepsin|dipeptidyl carboxypeptidase 1|dipeptidyl carboxypeptidase I|kininase II|peptidase P	17q23.3	17	NC_000017.11	63477061	63498373	plus	26	106180
9606	Homo sapiens	1401	0	live	CRP	PTX1	C-reactive protein	C-reactive protein|C-reactive protein, pentraxin-related|pentraxin 1	1q23.2	1	NC_000001.11	159712289	159714589	minus	3	123260
9606	Homo sapiens	367	0	live	AR	AIS8, DHTR, HUMARA, HYSP1, KD, NR3C4, SBMA, SMAX1, TFM, AR	androgen receptor	androgen receptor|dihydrotestosterone receptor|nuclear receptor subfamily 3 group C member 4	Xq12	X	NC_000023.11	67544021	67730619	plus	11	313700
9606	Homo sapiens	7099	0	live	TLR4	ARMD10, CD284, TLR-4, TOLL	toll like receptor 4	toll-like receptor 4|hToll|homolog of Drosophila toll|toll like receptor 4 protein	9q33.1	9	NC_000009.12	117704403	117724735	plus	4	603030
9606	Homo sapiens	7450	0	live	VWF	F8VWF, VWD	von Willebrand factor	von Willebrand factor|coagulation factor VIII VWF	12p13.31	12	NC_000012.12	5948877	6124670	minus	52	613160
9606	Homo sapiens	4582	0	live	MUC1	ADMCKD, ADMCKD1, ADTKD2, CA 15-3, CD227, EMA, H23AG, KL-6, MAM6, MCD, MCKD, MCKD1, MUC-1, MUC-1/SEC, MUC-1/X/ZD, PEM, PEMT, PUM, MUC1	mucin 1, cell surface associated	mucin-1|H23 antigen|breast carcinoma-associated antigen DF3|cancer antigen 15-3|carcinoma-associated mucin|episialin|krebs von den Lungen-6|mucin 1, transmembrane|peanut-reactive urinary mucin|polymorphic epithelial mucin|tumor associated epithelial mucin|tumor-associated epithelial membrane antigen	1q22	1	NC_000001.11	155185824	155192915	minus	11	158340
9606	Homo sapiens	929	0	live	CD14		CD14 molecule	monocyte differentiation antigen CD14|myeloid cell-specific leucine-rich glycoprotein	5q31.3	5	NC_000005.10	140631732	140633701	minus	3	158120
9606	Homo sapiens	59272	0	live	ACE2	ACEH	angiotensin converting enzyme 2	angiotensin-converting enzyme 2|ACE-related carboxypeptidase|angiotensin I converting enzyme (peptidyl-dipeptidase A) 2|angiotensin I converting enzyme 2|angiotensin-converting enzyme homolog|angiotensin-converting enzyme-related carboxypeptidase|metalloprotease MPROT15|peptidyl-dipeptidase A|truncated angiotensin converting enzyme 2	Xp22.2	X	NC_000023.11	15518197	15607211	minus	22	300335
9606	Homo sapiens	682	0	live	BSG	5F7, CD147, EMMPRIN, EMPRIN, HAb18G, OK, SLC7A11, TCSF	basigin (Ok blood group)	basigin|OK blood group antigen|collagenase stimulatory factor|extracellular matrix metalloproteinase inducer|hepatoma-associated antigen|leukocyte activation antigen M6|tumor cell-derived collagenase stimulatory factor	19p13.3	19	NC_000019.10	571283	583493	plus	10	109480
9606	Homo sapiens	1803	0	live	DPP4	ADABP, ADCP2, CD26, DPPIV, TP103	dipeptidyl peptidase 4	dipeptidyl peptidase 4|ADCP-2|DPP IV|Gly-Pro naphthylamidase|Post-proline dipeptidyl aminopeptidase IV|T-cell activation antigen CD26|Xaa-Pro-dipeptidylaminopeptidase|adenosine deaminase complexing protein 2|dipeptidyl peptidase IV|dipeptidylpeptidase 4|dipeptidylpeptidase IV (CD26, adenosine deaminase complexing protein 2)	2q24.2	2	NC_000002.12	161992245	162074215	minus	28	102720
227984	SARS coronavirus Tor2	1489668	0	live	S	sars2, E2	spike glycoprotein	spike glycoprotein			NC_004718.3	21492	25259	plus	0
9606	Homo sapiens	6868	0	live	ADAM17	ADAM18, CD156B, CSVP, NISBD, NISBD1, TACE	ADAM metallopeptidase domain 17	disintegrin and metalloproteinase domain-containing protein 17|ADAM metallopeptidase domain 18|TNF-alpha convertase|TNF-alpha convertase enzyme|TNF-alpha converting enzyme|a disintegrin and metalloproteinase 17|cartilage snake venom-like protease|snake venom-like protease|tumor necrosis factor, alpha, converting enzyme	2p25.1	2	NC_000002.12	9488486	9555830	minus	20	603639
9606	Homo sapiens	7137	0	live	TNNI3	CMD1FF, CMD2A, CMH7, RCM1, TNNC1, cTnI	troponin I3, cardiac type	troponin I, cardiac muscle|cardiomyopathy, dilated 2A (autosomal recessive)|troponin I type 3 (cardiac)	19q13.42	19	NC_000019.10	55151767	55157732	minus	8	191044
9606	Homo sapiens	5045	0	live	FURIN	FUR, PACE, PCSK3, SPC1	furin, paired basic amino acid cleaving enzyme	furin|FES upstream region|dibasic processing enzyme|furin, membrane associated receptor protein|paired basic amino acid residue-cleaving enzyme|proprotein convertase subtilisin/kexin 3|proprotein convertase subtilisin/kexin type 3|subtilisin-like proprotein convertase 1	15q26.1	15	NC_000015.10	90868588	90883457	plus	20	136950
9606	Homo sapiens	7113	0	live	TMPRSS2	PRSS10	transmembrane serine protease 2	transmembrane protease serine 2|epitheliasin|serine protease 10|transmembrane protease, serine 2	21q22.3	21	NC_000021.9	41464305	41508158	minus	15	602060
9606	Homo sapiens	11093	0	live	ADAMTS13	ADAM-TS13, ADAMTS-13, C9orf8, VWFCP, vWF-CP	ADAM metallopeptidase with thrombospondin type 1 motif 13	A disintegrin and metalloproteinase with thrombospondin motifs 13|a disintegrin-like and metalloprotease (reprolysin type) with thrombospondin type 1 motif, 13|vWF-cleaving protease|von Willebrand factor-cleaving protease	9q34.2	9	NC_000009.12	133414337	133459403	plus	31	604134
9606	Homo sapiens	3576	0	live	CXCL8	GCP-1, GCP1, IL8, LECT, LUCT, LYNAP, MDNCF, MONAP, NAF, NAP-1, NAP1, SCYB8	C-X-C motif chemokine ligand 8	interleukin-8|T-cell chemotactic factor|alveolar macrophage chemotactic factor I|beta endothelial cell-derived neutrophil activating peptide|beta-thromboglobulin-like protein|chemokine (C-X-C motif) ligand 8|emoctakin|granulocyte chemotactic protein 1|interleukin 8|lung giant cell carcinoma-derived chemotactic protein|lymphocyte derived neutrophil activating peptide|monocyte-derived neutrophil ch…	4q13.3	4	NC_000004.12	73740569	73743716	plus	3	146930
9606	Homo sapiens	1234	0	live	CCR5	CC-CKR-5, CCCKR5, CCR-5, CD195, CKR-5, CKR5, CMKBR5, IDDM22	C-C motif chemokine receptor 5	C-C chemokine receptor type 5|C-C motif chemokine receptor 5 A159A|HIV-1 fusion coreceptor|chemokine (C-C motif) receptor 5|chemokine receptor CCR5|chemokine recptor CCR5 Delta32|chemr13|mutant C-C motif chemokine receptor	3p21.31	3	NC_000003.12	46370142	46376206	plus	3	601373
9606	Homo sapiens	4879	0	live	NPPB	BNP, Iso-ANP	natriuretic peptide B	natriuretic peptides B|brain natriuretic factor prohormone|brain type natriuretic peptide|gamma-brain natriuretic peptide|natriuretic peptide precursor B|natriuretic protein|preproBNP|proBNP	1p36.22	1	NC_000001.11	11857464	11858945	minus	3	600295
9606	Homo sapiens	213	0	live	ALB	FDAHT, HSA, PRO0883, PRO0903, PRO1341	albumin	albumin|serum albumin	4q13.3	4	NC_000004.12	73404287	73421482	plus	15	103600
9606	Homo sapiens	3309	0	live	HSPA5	BIP, GRP78, HEL-S-89n	heat shock protein family A (Hsp70) member 5	endoplasmic reticulum chaperone BiP|78 kDa glucose-regulated protein|HSP70 family protein 5|binding-immunoglobulin protein|endoplasmic reticulum lumenal Ca(2+)-binding protein grp78|epididymis secretory sperm binding protein Li 89n|glucose-regulated protein, 78kDa|heat shock 70kDa protein 5 (glucose-regulated protein, 78kDa)|heat shock protein 70 family protein 5|heat shock protein family A membe…	9q33.3	9	NC_000009.12	125234853	125241343	minus	8	138120
9606	Homo sapiens	796	0	live	CALCA	CALC1, CGRP, CGRP-I, CGRP-alpha, CGRP1, CT, KC, PCT	calcitonin related polypeptide alpha	calcitonin|calcitonin gene-related peptide 1|alpha-type CGRP|calcitonin 1|calcitonin gene-related peptide I|calcitonin/calcitonin-related polypeptide, alpha|katacalcin	11p15.2	11	NC_000011.10	14966668	14972361	minus	7	114130
9606	Homo sapiens	133	0	live	ADM	AM, PAMP	adrenomedullin	pro-adrenomedullin|preproadrenomedullin|proadrenomedullin N-20 terminal peptide	11p15.4	11	NC_000011.10	10305073	10307397	plus	4	103275
9606	Homo sapiens	28	0	live	ABO	A3GALNT, A3GALT1, GTB, NAGAT	ABO, alpha 1-3-N-acetylgalactosaminyltransferase and alpha 1-3-galactosyltransferase	histo-blood group ABO system transferase|ABO blood group (transferase A, alpha 1-3-N-acetylgalactosaminyltransferase; transferase B, alpha 1-3-galactosyltransferase)|B(A) alpha-1,3-galactosyltransferase|histo-blood group A2 transferase	9q34.2	9	NC_000009.12	133250401	133275201	minus	7	110300
9606	Homo sapiens	6279	0	live	S100A8	60B8AG, CAGA, CFAG, CGLA, CP-10, L1Ag, MA387, MIF, MRP8, NIF, P8, S100-A8	S100 calcium binding protein A8	protein S100-A8|calgranulin A|calprotectin L1L subunit|cystic fibrosis antigen|leukocyte L1 complex light chain|migration inhibitory factor-related protein 8|urinary stone protein band A	1q21.3	1	NC_000001.11	153390032	153422583	minus	5	123885
10090	Mus musculus	70008	0	live	Ace2	2010305L05Rik	angiotensin I converting enzyme (peptidyl-dipeptidase A) 2	angiotensin-converting enzyme 2|ACE-related carboxypeptidase|angiotensin I converting enzyme 2	X 76.12 cM	X	NC_000086.8	162922338	162971414	plus	19
9606	Homo sapiens	10410	0	live	IFITM3	1-8U, DSPA2b, IP15	interferon induced transmembrane protein 3	interferon-induced transmembrane protein 3|dispanin subfamily A member 2b|interferon-inducible protein 1-8U	11p15.5	11	NC_000011.10	319676	320860	minus	2	605579
9606	Homo sapiens	925	0	live	CD8A	CD8, Leu2, p32	CD8a molecule	T-cell surface glycoprotein CD8 alpha chain|CD8 antigen, alpha polypeptide (p32)|Leu2 T-lymphocyte antigen|OKT8 T-cell antigen|T cell co-receptor|T-cell antigen Leu2|T-lymphocyte differentiation antigen T8/Leu-2|T8 T-cell antigen	2p11.2	2	NC_000002.12	86784605	86808396	minus	10	186910
9606	Homo sapiens	7040	0	live	TGFB1	CED, DPD1, IBDIMDE, LAP, TGF-beta1, TGFB, TGFbeta	transforming growth factor beta 1	transforming growth factor beta-1 proprotein|TGF-beta-1|latency-associated peptide|prepro-transforming growth factor beta-1|transforming growth factor beta1	19q13.2	19	NC_000019.10	41330323	41353922	minus	7	190180
9606	Homo sapiens	3091	0	live	HIF1A	HIF-1-alpha, HIF-1A, HIF-1alpha, HIF1, HIF1-ALPHA, MOP1, PASD8, bHLHe78	hypoxia inducible factor 1 subunit alpha	hypoxia-inducible factor 1-alpha|ARNT interacting protein|PAS domain-containing protein 8|PAS domain-containing protein 8", "Class E basic helix-loop-helix protein 78", "Member of PAS protein 1|basic-helix-loop-helix-PAS protein MOP1|class E basic helix-loop-helix protein 78|hypoxia inducible factor 1 alpha subunit|hypoxia inducible factor 1, alpha subunit (basic helix-loop-helix transcription fa…	14q23.2	14	NC_000014.9	61695513	61748258	plus	16	603348
9606	Homo sapiens	3106	0	live	HLA-B	AS, B-4901, HLAB	major histocompatibility complex, class I, B	major histocompatibility complex, class I, B|HLA class I antigen HLA-B|HLA class I histocompatibility antigen, B alpha chain|MHC HLA-B cell surface glycoprotein|MHC HLA-B transmembrane glycoprotein|MHC class 1 antigen|MHC class I antigen HLA-B alpha chain|MHC class I antigen HLA-B heavy chain|MHC class I antigen SHCHA|MHC class I molecule|leukocyte antigen class I-B	6p21.33	6	NC_000006.12	31353875	31357179	minus	8	142830
9606	Homo sapiens	3105	0	live	HLA-A	HLAA	major histocompatibility complex, class I, A	HLA class I histocompatibility antigen, A alpha chain|HLA class I histocompatibility antigen, A-1 alpha chain|MHC class I antigen HLA-A heavy chain|leukocyte antigen class I-A	6p22.1	6	NC_000006.12	29942532	29945870	plus	8	142800
9606	Homo sapiens	3565	0	live	IL4	BCGF-1, BCGF1, BSF-1, BSF1, IL-4	interleukin 4	interleukin-4|B cell growth factor 1|B_cell stimulatory factor 1|binetrakin|interleukin 4 variant 2|lymphocyte stimulatory factor 1|pitrakinra	5q31.1	5	NC_000005.10	132673989	132682678	plus	5	147780
10116	Rattus norvegicus	302668	0	live	Ace2		angiotensin I converting enzyme 2	angiotensin-converting enzyme 2|ACE-related carboxypeptidase|angiotensin I converting enzyme (peptidyl-dipeptidase A) 2|anigotensin-converting enzyme-related carboxypeptidase|renal angiotensin-converting enzyme 2	Xq14	X	NC_051356.1	30293597	30340961	minus	19
9606	Homo sapiens	3107	0	live	HLA-C	D6S204, HLA-JY3, HLAC, HLC-C, MHC, PSORS1	major histocompatibility complex, class I, C	HLA class I histocompatibility antigen, C alpha chain|HLA-C antigen|MHC class I antigen heavy chain HLA-C|human leukocyte antigen-C alpha chain|major histocompatibility antigen HLA-C	6p21.33	6	NC_000006.12	31268749	31272092	minus	8	142840
9606	Homo sapiens	3559	0	live	IL2RA	CD25, IDDM10, IL2R, IMD41, TCGFR, p55	interleukin 2 receptor subunit alpha	interleukin-2 receptor subunit alpha|IL-2 receptor subunit alpha|IL-2R subunit alpha|TAC antigen|interleukin 2 receptor, alpha	10p15.1	10	NC_000010.11	6010689	6062367	minus	8	147730
9606	Homo sapiens	6280	0	live	S100A9	60B8AG, CAGB, CFAG, CGLB, L1AG, LIAG, MAC387, MIF, MRP14, NIF, P14, S100-A9	S100 calcium binding protein A9	protein S100-A9|MRP-14|calgranulin B|calprotectin L1H subunit|leukocyte L1 complex heavy chain|migration inhibitory factor-related protein 14	1q21.3	1	NC_000001.11	153357854	153361023	plus	3	123886
9606	Homo sapiens	8829	0	live	NRP1	BDCA4, CD304, NP1, NRP, VEGF165R	neuropilin 1	neuropilin-1|transmembrane receptor|vascular endothelial cell growth factor 165 receptor	10p11.22	10	NC_000010.11	33177493	33334667	minus	18	602069
9606	Homo sapiens	1956	0	live	EGFR	ERBB, ERBB1, ERRP, HER1, NISBD2, PIG61, mENA	epidermal growth factor receptor	epidermal growth factor receptor|EGFR vIII|avian erythroblastic leukemia viral (v-erb-b) oncogene homolog|cell growth inhibiting protein 40|cell proliferation-inducing protein 61|epidermal growth factor receptor tyrosine kinase domain|erb-b2 receptor tyrosine kinase 1|proto-oncogene c-ErbB-1|receptor tyrosine-protein kinase erbB-1	7p11.2	7	NC_000007.14	55019017	55211628	plus	31	131550
9606	Homo sapiens	7124	0	live	TNF	DIF-alpha, TNFA, TNFSF2, TNLG1F, TNF	tumor necrosis factor	tumor necrosis factor|APC1 protein|TNF, macrophage-derived|TNF, monocyte-derived|TNF-a|tumor necrosis factor ligand 1F|tumor necrosis factor ligand superfamily member 2|tumor necrosis factor-alpha	6p21.33	6	NC_000006.12	31575565	31578336	plus	4	191160
9606	Homo sapiens	4524	0	live	MTHFR		methylenetetrahydrofolate reductase	methylenetetrahydrofolate reductase|5,10-methylenetetrahydrofolate reductase (NADPH)|methylenetetrahydrofolate reductase (NAD(P)H)	1p36.22	1	NC_000001.11	11785723	11806103	minus	12	607093
9606	Homo sapiens	6774	0	live	STAT3	ADMIO, ADMIO1, APRF, HIES	signal transducer and activator of transcription 3	signal transducer and activator of transcription 3|DNA-binding protein APRF|acute-phase response factor	17q21.2	17	NC_000017.11	42313324	42388502	minus	24	102582
9606	Homo sapiens	3553	0	live	IL1B	IL-1, IL1-BETA, IL1F2, IL1beta	interleukin 1 beta	interleukin-1 beta|IL-1 beta|catabolin|interleukin 1beta|preinterleukin 1 beta|pro-interleukin-1-beta	2q14.1	2	NC_000002.12	112829751	112836843	minus	7	147720
9606	Homo sapiens	2475	0	live	MTOR	FRAP, FRAP1, FRAP2, RAFT1, RAPT1, SKS	mechanistic target of rapamycin kinase	serine/threonine-protein kinase mTOR|FK506 binding protein 12-rapamycin associated protein 2|FK506-binding protein 12-rapamycin complex-associated protein 1|FKBP-rapamycin associated protein|FKBP12-rapamycin complex-associated protein 1|mammalian target of rapamycin|mechanistic target of rapamycin (serine/threonine kinase)|rapamycin and FKBP12 target 1|rapamycin associated protein FRAP2|rapamycin…	1p36.22	1	NC_000001.11	11106535	11273497	minus	60	601231
9606	Homo sapiens	3458	0	live	IFNG	IFG, IFI, IMD69	interferon gamma	interferon gamma|IFN-gamma|immune interferon	12q15	12	NC_000012.12	68154768	68159740	minus	4	147570
9606	Homo sapiens	920	0	live	CD4	CD4mut, IMD79, OKT4D	CD4 molecule	T-cell surface glycoprotein CD4|CD4 antigen (p55)|CD4 receptor|T-cell surface antigen T4/Leu-3	12p13.31	12	NC_000012.12	6789528	6820799	plus	11	186940
9606	Homo sapiens	6347	0	live	CCL2	GDCF-2, HC11, HSMCR30, MCAF, MCP-1, MCP1, SCYA2, SMC-CF	C-C motif chemokine ligand 2	C-C motif chemokine 2|chemokine (C-C motif) ligand 2|monocyte chemoattractant protein-1|monocyte chemotactic and activating factor|monocyte chemotactic protein 1|monocyte secretory protein JE|small inducible cytokine A2 (monocyte chemotactic protein 1, homologous to mouse Sig-je)|small inducible cytokine subfamily A (Cys-Cys), member 2|small-inducible cytokine A2	17q12	17	NC_000017.11	34255285	34257203	plus	3	158105
9606	Homo sapiens	2952	0	live	GSTT1		glutathione S-transferase theta 1	glutathione S-transferase theta-1|GST class-theta-1|glutathione transferase T1-1	22q11.23	22						600436
9606	Homo sapiens	3146	0	live	HMGB1	HMG-1, HMG1, HMG3, SBP-1	high mobility group box 1	high mobility group protein B1|Amphoterin|Sulfoglucuronyl carbohydrate binding protein|high-mobility group (nonhistone chromosomal) protein 1	13q12.3	13	NC_000013.11	30456704	30617597	minus	9	163905
9606	Homo sapiens	3162	0	live	HMOX1	HMOX1D, HO-1, HSP32, bK286B10	heme oxygenase 1	heme oxygenase 1|heat shock protein, 32-kD|heme oxygenase (decycling) 1	22q12.3	22	NC_000022.11	35381096	35394207	plus	5	141250
9606	Homo sapiens	3606	0	live	IL18	IGIF, IL-18, IL-1g, IL1F4	interleukin 18	interleukin-18|IFN-gamma-inducing factor|IL-1 gamma|iboctadekin|interleukin 18 (interferon-gamma-inducing factor)|interleukin-1 gamma	11q23.1	11	NC_000011.10	112143251	112164104	minus	6	600953
9606	Homo sapiens	355	0	live	FAS	ALPS1A, APO-1, APT1, CD951, FASTM, TNFRSF6, FAS	Fas cell surface death receptor	tumor necrosis factor receptor superfamily member 6|APO-1 cell surface antigen|CD95 antigen|FASLG receptor|Fas (TNF receptor superfamily, member 6)|Fas AMA|TNF receptor superfamily member 6|apoptosis antigen 1|apoptosis signaling receptor FAS|apoptosis-mediating surface antigen FAS|mutant tumor necrosis receptor superfamily member 6|tumor necrosis factor receptor superfamily, member 6	10q23.31	10	NC_000010.11	88968429	89017059	plus	15	134637
9606	Homo sapiens	177	0	live	AGER	RAGE, SCARJ1, sRAGE	advanced glycosylation end-product specific receptor	advanced glycosylation end product-specific receptor|receptor for advanced glycation end-products variant 20	6p21.32	6	NC_000006.12	32180969	32184380	minus	11	600214
9606	Homo sapiens	183	0	live	AGT	ANHU, SERPINA8, hFLT1	angiotensinogen	angiotensinogen|alpha-1 antiproteinase, antitrypsin|angiotensin I|angiotensin II|fetal-liver predominant transporter 1|pre-angiotensinogen|serine (or cysteine) proteinase inhibitor|serpin A8|serpin peptidase inhibitor, clade A, member 8	1q42.2	1	NC_000001.11	230702523	230745583	minus	6	106150
9606	Homo sapiens	4312	0	live	MMP1	CLG, CLGN	matrix metallopeptidase 1	interstitial collagenase|fibroblast collagenase|matrix metallopeptidase 1 (interstitial collagenase)|matrix metalloprotease 1	11q22.2	11	NC_000011.10	102789919	102798160	minus	10	120353
9606	Homo sapiens	2152	0	live	F3	CD142, TF, TFA	coagulation factor III, tissue factor	tissue factor|coagulation factor III (thromboplastin, tissue factor)	1p21.3	1	NC_000001.11	94529173	94541759	minus	6	134390
9606	Homo sapiens	3627	0	live	CXCL10	C7, IFI10, INP10, IP-10, SCYB10, crg-2, gIP-10, mob-1	C-X-C motif chemokine ligand 10	C-X-C motif chemokine 10|10 kDa interferon gamma-induced protein|gamma IP10|interferon-inducible cytokine IP-10|protein 10 from interferon (gamma)-induced cell line|small inducible cytokine subfamily B (Cys-X-Cys), member 10|small-inducible cytokine B10	4q21.1	4	NC_000004.12	76021118	76023497	minus	4	147310
9606	Homo sapiens	7098	0	live	TLR3	CD283, IIAE2, IMD83	toll like receptor 3	toll-like receptor 3	4q35.1	4	NC_000004.12	186069156	186088073	plus	5	603029
9606	Homo sapiens	90865	0	live	IL33	C9orf26, DVS27, IL1F11, NF-HEV, NFEHEV	interleukin 33	interleukin-33|DVS27-related protein|interleukin-1 family member 11|nuclear factor for high endothelial venules|nuclear factor from high endothelial venules	9p24.1	9	NC_000009.12	6214591	6257983	plus	11	608678
9606	Homo sapiens	5806	0	live	PTX3	TNFAIP5, TSG-14	pentraxin 3	pentraxin-related protein PTX3|TNF alpha-induced protein 5|long pentraxin 3|tumor necrosis factor alpha-induced protein 5|tumor necrosis factor-inducible gene 14 protein|tumor necrosis factor-inducible protein TSG-14	3q25.32	3	NC_000003.12	157436850	157443633	plus	3	602492
9606	Homo sapiens	7139	0	live	TNNT2	CMD1D, CMH2, CMPD2, LVNC6, RCM3, TnTC, cTnT	troponin T2, cardiac type	troponin T, cardiac muscle|cardiomyopathy, dilated 1D (autosomal dominant)|cardiomyopathy, hypertrophic 2|troponin T type 2 (cardiac)|truncated cardiac troponin T	1q32.1	1	NC_000001.11	201359014	201377828	minus	17	191045
9606	Homo sapiens	6403	0	live	SELP	CD62, CD62P, GMP140, GRMP, LECAM3, PADGEM, PSEL	selectin P	P-selectin|CD62 antigen-like family member P|GMP-140|granule membrane protein 140|granule membrane protein 140kDa|granulocyte membrane protein|leukocyte-endothelial cell adhesion molecule 3|platelet activation dependent granule-external membrane protein|platelet alpha-granule membrane protein|selectin P (granule membrane protein 140kDa, antigen CD62)	1q24.2	1	NC_000001.11	169588849	169630125	minus	18	173610
9606	Homo sapiens	6288	0	live	SAA1	PIG4, SAA, SAA2, TP53I4	serum amyloid A1	serum amyloid A-1 protein|serum amyloid A protein|tumor protein p53 inducible protein 4	11p15.1	11	NC_000011.10	18266264	18269967	plus	4	104750
9606	Homo sapiens	3716	0	live	JAK1	AIIDEA, JAK1B, JTK3, JAK1	Janus kinase 1	tyrosine-protein kinase JAK1	1p31.3	1	NC_000001.11	64833229	65067746	minus	29	147795
9606	Homo sapiens	54210	0	live	TREM1	CD354, TREM-1	triggering receptor expressed on myeloid cells 1	triggering receptor expressed on myeloid cells 1|triggering receptor expressed on monocytes 1	6p21.1	6	NC_000006.12	41267385	41286692	minus	6	605085
9606	Homo sapiens	5551	0	live	PRF1	HPLH2, P1, PFP	perforin 1	perforin-1|cytolysin|lymphocyte pore-forming protein|perforin 1 (pore forming protein)	10q22.1	10	NC_000010.11	70597348	70602741	minus	3	170280
9606	Homo sapiens	1514	0	live	CTSL	CATL1, MEP, CTSL	cathepsin L	procathepsin L|cathepsin L1|major excreted protein	9q21.33	9	NC_000009.12	87726119	87731469	plus	9	116880
9606	Homo sapiens	3827	0	live	KNG1	BDK, BK, HAE6, HMWK, KNG	kininogen 1	kininogen-1|alpha-2-thiol proteinase inhibitor|bradykinin|fitzgerald factor|high molecular weight kininogen|williams-Fitzgerald-Flaujeac factor	3q27.3	3	NC_000003.12	186717359	186744410	plus	10	612358
9606	Homo sapiens	5726	0	live	TAS2R38	PTC, T2R38, T2R61, THIOT	taste 2 receptor member 38	taste receptor type 2 member 38|PTC bitter taste receptor|taste receptor type 2 member 61|taste receptor, type 2, member 38	7q34	7	NC_000007.14	141972631	141973773	minus	1	607751
9606	Homo sapiens	3440	0	live	IFNA2	IFN-alpha-2, IFN-alphaA, IFNAB, leIF A, IFNA2	interferon alpha 2	interferon alpha-2|alpha-2a interferon|interferon alpha 2a|interferon alpha 2b|interferon alpha A	9p21.3	9	NC_000009.12	21384255	21385398	minus	1	147562
9606	Homo sapiens	10332	0	live	CLEC4M	CD209L, CD299, DC-SIGN2, DC-SIGNR, DCSIGNR, HP10347, L-SIGN, LSIGN	C-type lectin domain family 4 member M	C-type lectin domain family 4 member M|CD209 antigen-like protein 1|CD299 antigen|DC-SIGN-related protein|dendritic cell-specific ICAM-3-grabbing non-integrin 2|liver/lymph node-specific ICAM-3 grabbing non-integrin|mannose binding C-type lectin DC-SIGNR	19p13.2	19	NC_000019.10	7763243	7769605	plus	8	605872
9606	Homo sapiens	4151	0	live	MB	PVALB	myoglobin	myoglobin	22q12.3	22	NC_000022.11	35606764	35623354	minus	8	160000
9606	Homo sapiens	10663	0	live	CXCR6	BONZO, CD186, CDw186, STRL33, TYMSTR	C-X-C motif chemokine receptor 6	C-X-C chemokine receptor type 6|G protein-coupled receptor|G-protein coupled receptor STRL33|G-protein coupled receptor bonzo|chemokine (C-X-C motif) receptor 6	3p21.31	3	NC_000003.12	45940915	45948351	plus	4	605163
9606	Homo sapiens	6614	0	live	SIGLEC1	CD169, SIGLEC-1, SN	sialic acid binding Ig like lectin 1	sialoadhesin|sialic acid binding Ig-like lectin 1, sialoadhesin|sialic acid-binding immunoglobulin-like lectin 1	20p13	20	NC_000020.11	3686970	3712600	minus	22	600751
9606	Homo sapiens	54716	0	live	SLC6A20	IMINO, SIT1, XT3, Xtrp3	solute carrier family 6 member 20	sodium- and chloride-dependent transporter XTRP3|X transporter protein 3|neurotransmitter transporter RB21A|orphan transporter XT3|sodium-dependent imino acid transporter 1|sodium/imino-acid transporter 1|solute carrier family 6 (neurotransmitter transporter), member 20|solute carrier family 6 (proline IMINO transporter), member 20|transporter rB21A homolog	3p21.31	3	NC_000003.12	45755449	45796553	minus	12	605616
9606	Homo sapiens	348	0	live	APOE	AD2, APO-E, ApoE4, LDLCQ5, LPG	apolipoprotein E	apolipoprotein E|apolipoprotein E3	19q13.32	19	NC_000019.10	44905796	44909393	plus	6	107741
9606	Homo sapiens	9370	0	live	ADIPOQ	ACDC, ACRP30, ADIPQTL1, ADPN, APM-1, APM1, GBP28	adiponectin, C1Q and collagen domain containing	adiponectin|30 kDa adipocyte complement-related protein|adipocyte complement-related 30 kDa protein|adipose most abundant gene transcript 1 protein|adipose specific collagen-like factor|gelatin-binding protein 28	3q27.3	3	NC_000003.12	186842710	186858463	plus	4	605441
9606	Homo sapiens	207	0	live	AKT1	AKT, PKB, PKB-ALPHA, PRKBA, RAC, RAC-ALPHA	AKT serine/threonine kinase 1	RAC-alpha serine/threonine-protein kinase|AKT1m|PKB alpha|RAC-PK-alpha|protein kinase B alpha|proto-oncogene c-Akt|rac protein kinase alpha|serine-threonine protein kinase|v-akt murine thymoma viral oncogene homolog 1|v-akt murine thymoma viral oncogene-like protein 1	14q32.33	14	NC_000014.9	104769349	104795748	minus	15	164730
9606	Homo sapiens	3123	0	live	HLA-DRB1	DRB1, HLA-DR1B, HLA-DRB, SS1	major histocompatibility complex, class II, DR beta 1	major histocompatibility complex, class II, DR beta 1 precursor|HLA class II histocompatibility antigen, DR-1 beta chain|MHC class II HLA-DR beta 1 chain|human leucocyte antigen DRB1|lymphocyte antigen DRB1	6p21.32	6	NC_000006.12	32578775	32589848	minus	6	142857
9606	Homo sapiens	7421	0	live	VDR	NR1I1, PPP1R163	vitamin D receptor	vitamin D3 receptor|1,25-dihydroxyvitamin D3 receptor|nuclear receptor subfamily 1 group I member 1|protein phosphatase 1, regulatory subunit 163|vitamin D (1,25- dihydroxyvitamin D3) receptor|vitamin D nuclear receptor variant 1|vitamin D3 receptor isoform VDRA	12q13.11	12	NC_000012.12	47841537	47905022	minus	12	601769
9606	Homo sapiens	4846	0	live	NOS3	ECNOS, eNOS	nitric oxide synthase 3	nitric oxide synthase, endothelial|EC-NOS|NOS type III|NOSIII|cNOS|constitutive NOS|endothelial NOS|nitric oxide synthase 3 (endothelial cell)|nitric oxide synthase 3 transcript variant eNOS-delta20|nitric oxide synthase 3 transcript variant eNOS-delta20-21|nitric oxide synthase 3 transcript variant eNOS-delta21	7q36.1	7	NC_000007.14	150991017	151014588	plus	28	163729
9606	Homo sapiens	6532	0	live	SLC6A4	5-HTT, 5-HTTLPR, 5HTT, HTT, OCD1, SERT, SERT1, hSERT	solute carrier family 6 member 4	sodium-dependent serotonin transporter|5-hydroxytryptamine (serotonin) transporter|5HT transporter|Na+/Cl- dependent serotonin transporter|serotonin transporter 1|solute carrier family 6 (neurotransmitter transporter), member 4|solute carrier family 6 (neurotransmitter transporter, serotonin), member 4	17q11.2	17	NC_000017.11	30194319	30235697	minus	15	182138
9606	Homo sapiens	596	0	live	BCL2	Bcl-2, PPP1R50	BCL2 apoptosis regulator	apoptosis regulator Bcl-2|B-cell CLL/lymphoma 2|protein phosphatase 1, regulatory subunit 50	18q21.33	18	NC_000018.10	63123346	63320280	minus	6	151430
9606	Homo sapiens	3952	0	live	LEP	LEPD, OB, OBS	leptin	leptin|leptin (murine obesity homolog)|leptin (obesity homolog, mouse)|obese protein|obese, mouse, homolog of|obesity factor	7q32.1	7	NC_000007.14	128241201	128257629	plus	3	164160
9606	Homo sapiens	2944	0	live	GSTM1	GST1-1, GSTM1a-1a, GSTM1b-1b, GTH4, GTM1, H-B, MU, MU-1, GSTM1	glutathione S-transferase mu 1	glutathione S-transferase Mu 1|GST HB subunit 4|GST class-mu 1|HB subunit 4|S-(hydroxyalkyl)glutathione lyase|glutathione S-alkyltransferase|glutathione S-aralkyltransferase|glutathione S-aryltransferase|glutathione S-transferase M1	1p13.3	1	NC_000001.11	109687817	109693745	plus	8	138350
9606	Homo sapiens	4780	0	live	NFE2L2	HEBP1, IMDDHH, NRF2, Nrf-2	NFE2 like bZIP transcription factor 2	nuclear factor erythroid 2-related factor 2|nuclear factor erythroid-derived 2-like 2|nuclear factor, erythroid 2 like 2	2q31.2	2	NC_000002.12	177230303	177265131	minus	6	600492
9606	Homo sapiens	3605	0	live	IL17A	CTLA-8, CTLA8, IL-17, IL-17A, IL17, ILA17	interleukin 17A	interleukin-17A|cytotoxic T-lymphocyte-associated antigen 8|cytotoxic T-lymphocyte-associated protein 8|interleukin 17 (cytotoxic T-lymphocyte-associated serine esterase 8)|interleukin-17	6p12.2	6	NC_000006.12	52186375	52190638	plus	3	603149
9606	Homo sapiens	2147	0	live	F2	PT, RPRGL2, THPH1	coagulation factor II, thrombin	prothrombin|prepro-coagulation factor II|prothrombin B-chain|thrombin factor II	11p11.2	11	NC_000011.10	46719213	46739506	plus	14	176930
9606	Homo sapiens	6696	0	live	SPP1	BNSP, BSPI, ETA-1, OPN	secreted phosphoprotein 1	osteopontin|SPP1/CALPHA1 fusion|early T-lymphocyte activation 1|nephropontin|osteopontin/immunoglobulin alpha 1 heavy chain constant region fusion protein|secreted phosphoprotein 1 (osteopontin, bone sialoprotein I, early T-lymphocyte activation 1)|secreted phosphoprotein 1 variant 6|urinary stone protein|uropontin	4q22.1	4	NC_000004.12	87975714	87983411	plus	8	166490
9606	Homo sapiens	3958	0	live	LGALS3	CBP35, GAL3, GALBP, GALIG, L31, LGALS2, MAC2	galectin 3	galectin-3|35 kDa lectin|IgE-binding protein|MAC-2 antigen|advanced glycation end-product receptor 3|carbohydrate-binding protein 35|epididymis secretory sperm binding protein|galactose-specific lectin 3|laminin-binding protein|lectin L-29|lectin, galactoside-binding, soluble, 3	14q22.3	14	NC_000014.9	55129252	55145430	plus	6	153619
9606	Homo sapiens	1906	0	live	EDN1	ARCND3, ET1, HDLCQ7, PPET1, QME	endothelin 1	endothelin-1|preproendothelin-1	6p24.1	6	NC_000006.12	12256463	12297194	plus	9	131240
9606	Homo sapiens	4153	0	live	MBL2	COLEC1, HSMBPC, MBLD, MBP, MBP-C, MBP1, MBPD, MBL2	mannose binding lectin 2	mannose-binding protein C|collectin-1|mannan-binding lectin|mannose-binding lectin (protein C) 2, soluble (opsonic defect)|mannose-binding lectin 2, soluble (opsonic defect)	10q21.1	10	NC_000010.11	52765380	52772784	minus	5	154545
9606	Homo sapiens	3934	0	live	LCN2	24p3, MSFI, NGAL, p25	lipocalin 2	neutrophil gelatinase-associated lipocalin|25 kDa alpha-2-microglobulin-related subunit of MMP-9|migration-stimulating factor inhibitor|oncogene 24p3|siderocalin LCN2	9q34.11	9	NC_000009.12	128149453	128153453	plus	7	600181
9606	Homo sapiens	114548	0	live	NLRP3	AGTAVPRL, AII, AVP, C1orf7, CIAS1, CLR1.1, DFNA34, FCAS, FCAS1, FCU, KEFH, MWS, NALP3, PYPAF1	NLR family pyrin domain containing 3	NACHT, LRR and PYD domains-containing protein 3|NACHT domain-, leucine-rich repeat-, and PYD-containing protein 3|NACHT, LRR and PYD containing protein 3|PYRIN-containing APAF1-like protein 1|caterpiller protein 1.1|cold autoinflammatory syndrome 1 protein|cold-induced autoinflammatory syndrome 1 protein|cryopyrin|cryopyrin, NACHT, LRR and PYD domains - containing protein 3|deafness, autosomal do…	1q44	1	NC_000001.11	247416163	247448823	plus	11	606416
9606	Homo sapiens	4282	0	live	MIF	GIF, GLIF, MMIF	macrophage migration inhibitory factor	macrophage migration inhibitory factor|L-dopachrome isomerase|L-dopachrome tautomerase|epididymis secretory sperm binding protein|macrophage migration inhibitory factor (glycosylation-inhibiting factor)|phenylpyruvate tautomerase	22q11.23	22	NC_000022.11	23894383	23895223	plus	3	153620
9606	Homo sapiens	406938	0	live	MIR146A	MIRN146, MIRN146A, miR-146a, miRNA146A	microRNA 146a	hsa-mir-146|hsa-mir-146a	5q33.3	5	NC_000005.10	160485352	160485450	plus	1	610566
9606	Homo sapiens	6772	0	live	STAT1	CANDF7, IMD31A, IMD31B, IMD31C, ISGF-3, STAT91	signal transducer and activator of transcription 1	signal transducer and activator of transcription 1-alpha/beta|signal transducer and activator of transcription 1, 91kD|signal transducer and activator of transcription 1, 91kDa|transcription factor ISGF-3 components p91/p84	2q32.2	2	NC_000002.12	190968989	191014197	minus	26	600555
9606	Homo sapiens	7276	0	live	TTR	ATTR, CTS, CTS1, HEL111, HsT2651, PALB, TBPA, TTN	transthyretin	transthyretin|epididymis luminal protein 111|prealbumin, amyloidosis type I|thyroxine-binding prealbumin	18q12.1	18	NC_000018.10	31591877	31598821	plus	4	176300
9606	Homo sapiens	5265	0	live	SERPINA1	A1A, A1AT, AAT, PI, PI1, PRO2275, alpha1AT, nNIF	serpin family A member 1	alpha-1-antitrypsin|alpha-1 antitrypsin|alpha-1 protease inhibitor|alpha-1 proteinase inhibitor|alpha-1-antiproteinase|alpha-1-antitrypsin short transcript variant 1C4|alpha-1-antitrypsin short transcript variant 1C5|anti-elastase|epididymis secretory sperm binding protein|protease inhibitor 1 (anti-elastase), alpha-1-antitrypsin|serine (or cysteine) proteinase inhibitor, clade A, member 1|serpin…	14q32.13	14	NC_000014.9	94376747	94390654	minus	7	107400
9606	Homo sapiens	3558	0	live	IL2	IL-2, TCGF, lymphokine	interleukin 2	interleukin-2|T cell growth factor|aldesleukin|involved in regulation of T-cell clonal expansion	4q27	4	NC_000004.12	122451470	122456725	minus	4	147680
9606	Homo sapiens	2321	0	live	FLT1	FLT, FLT-1, VEGFR-1, VEGFR1	fms related receptor tyrosine kinase 1	vascular endothelial growth factor receptor 1|fms related tyrosine kinase 1|fms-like tyrosine kinase 1|fms-related tyrosine kinase 1 (vascular endothelial growth factor/vascular permeability factor receptor)|tyrosine-protein kinase FRT|tyrosine-protein kinase receptor FLT|vascular permeability factor receptor	13q12.3	13	NC_000013.11	28300346	28495128	minus	33	165070
9606	Homo sapiens	1471	0	live	CST3	ARMD11, HEL-S-2	cystatin C	cystatin-C|bA218C14.4 (cystatin C)|cystatin 3|epididymis secretory protein Li 2|gamma-trace|neuroendocrine basic polypeptide|post-gamma-globulin	20p11.21	20	NC_000020.11	23626706	23637955	minus	4	604312
9606	Homo sapiens	4314	0	live	MMP3	CHDS6, MMP-3, SL-1, STMY, STMY1, STR1	matrix metallopeptidase 3	stromelysin-1|matrix metalloproteinase 3 (stromelysin 1, progelatinase)|proteoglycanase|transin-1	11q22.2	11	NC_000011.10	102835801	102843609	minus	10	185250
9606	Homo sapiens	5329	0	live	PLAUR	CD87, U-PAR, UPAR, URKR	plasminogen activator, urokinase receptor	urokinase plasminogen activator surface receptor|monocyte activation antigen Mo3|u-plasminogen activator receptor form 2|urokinase-type plasminogen activator (uPA) receptor	19q13.31	19	NC_000019.10	43646095	43670197	minus	11	173391
9606	Homo sapiens	3596	0	live	IL13	IL-13, P600	interleukin 13	interleukin-13	5q31.1	5	NC_000005.10	132656522	132661110	plus	6	147683
9606	Homo sapiens	9518	0	live	GDF15	GDF-15, MIC-1, MIC1, NAG-1, PDF, PLAB, PTGFB	growth differentiation factor 15	growth/differentiation factor 15|NRG-1|NSAID (nonsteroidal anti-inflammatory drug)-activated protein 1|NSAID-activated gene 1 protein|NSAID-regulated gene 1 protein|PTGF-beta|macrophage inhibitory cytokine 1|non-steroidal anti-inflammatory drug-activated gene-1|placental TGF-beta|placental bone morphogenetic protein|prostate differentiation factor	19p13.11	19	NC_000019.10	18382170	18389176	plus	3	605312
9606	Homo sapiens	5027	0	live	P2RX7	P2X7	purinergic receptor P2X 7	P2X purinoceptor 7|ATP receptor|P2X7 receptor|P2Z receptor|purinergic receptor P2X, ligand gated ion channel, 7|purinergic receptor P2X7 variant A|purnergic receptor P2X 7	12q24.31	12	NC_000012.12	121132819	121188032	plus	13	602566
9606	Homo sapiens	4018	0	live	LPA	AK38, APOA, LP	lipoprotein(a)	apolipoprotein(a)|antiangiogenic AK38 protein|apo(a)|lipoprotein, Lp(a)|lp(a)	6q25.3-q26	6	NC_000006.12	160531482	160664275	minus	39	152200
10116	Rattus norvegicus	156435	0	live	Tmprss2		transmembrane serine protease 2	transmembrane protease serine 2|transmembrane protease, serine 2	11q12	11	NC_051346.1	36934306	36973779	minus	14
9606	Homo sapiens	203228	0	live	C9orf72	ALSFTD, DENND9, DENNL72, FTDALS, FTDALS1	C9orf72-SMCR8 complex subunit	guanine nucleotide exchange C9orf72|protein C9orf72	9p21.2	9	NC_000009.12	27546546	27573866	minus	12	614260
9606	Homo sapiens	8678	0	live	BECN1	ATG6, VPS30, beclin1	beclin 1	beclin-1|ATG6 autophagy related 6 homolog|beclin 1 (coiled-coil, moesin-like BCL2-interacting protein)|beclin 1, autophagy related|coiled-coil myosin-like BCL2-interacting protein|testis secretory sperm-binding protein Li 215e	17q21.31	17	NC_000017.11	42810132	42824282	minus	13	604378
9606	Homo sapiens	3685	0	live	ITGAV	CD51, MSK8, VNRA, VTNR	integrin subunit alpha V	integrin alpha-V|antigen identified by monoclonal antibody L230|integrin alphaVbeta3|integrin, alpha V (vitronectin receptor, alpha polypeptide, antigen CD51)|vitronectin receptor subunit alpha	2q32.1	2	NC_000002.12	186590056	186680901	plus	31	193210
9606	Homo sapiens	2056	0	live	EPO	DBAL, ECYT5, EP, MVCD2	erythropoietin	erythropoietin|epoetin	7q22.1	7	NC_000007.14	100720468	100723700	plus	5	133170
9606	Homo sapiens	2539	0	live	G6PD	G6PD1	glucose-6-phosphate dehydrogenase	glucose-6-phosphate 1-dehydrogenase|epididymis secretory sperm binding protein	Xq28	X	NC_000023.11	154531390	154547569	minus	14	305900
9606	Homo sapiens	285	0	live	ANGPT2	AGPT2, ANG2, LMPHM10	angiopoietin 2	angiopoietin-2|Tie2-ligand|angiopoietin-2B|angiopoietin-2a	8p23.1	8	NC_000008.11	6499632	6563245	minus	9	601922
9606	Homo sapiens	7133	0	live	TNFRSF1B	CD120b, TBPII, TNF-R-II, TNF-R75, TNFBR, TNFR1B, TNFR2, TNFR80, p75, p75TNFR	TNF receptor superfamily member 1B	tumor necrosis factor receptor superfamily member 1B|TNF-R2|TNF-RII|p75 TNF receptor|p80 TNF-alpha receptor|soluble TNFR1B variant 1|tumor necrosis factor beta receptor|tumor necrosis factor binding protein 2|tumor necrosis factor receptor 2|tumor necrosis factor receptor type II	1p36.22	1	NC_000001.11	12166948	12209222	plus	11	191191
9606	Homo sapiens	7442	0	live	TRPV1	VR1	transient receptor potential cation channel subfamily V member 1	transient receptor potential cation channel subfamily V member 1|OTRPC1|capsaicin receptor|osm-9-like TRP channel 1|transient receptor potential vanilloid 1a|transient receptor potential vanilloid 1b|vanilloid receptor subtype 1	17p13.2	17	NC_000017.11	3565446	3609411	minus	19	602076
9606	Homo sapiens	2214	0	live	FCGR3A	CD16, CD16A, FCG3, FCGR3, FCGRIII, FCR-10, FCRIII, FCRIIIA, IGFR3, IMD20	Fc fragment of IgG receptor IIIa	low affinity immunoglobulin gamma Fc region receptor III-A|CD16a antigen|Fc fragment of IgG, low affinity III, receptor for (CD16)|Fc fragment of IgG, low affinity IIIa, receptor (CD16a)|Fc gamma receptor III-A|Fc-gamma RIII-alpha|Fc-gamma receptor III-2 (CD 16)|Fc-gamma receptor IIIb (CD16)|FcgammaRIIIA|igG Fc receptor III-2|immunoglobulin G Fc receptor III|low affinity immunoglobulin gamma rece…	1q23.3	1	NC_000001.11	161541759	161550737	minus	7	146740
9606	Homo sapiens	9021	0	live	SOCS3	ATOD4, CIS3, Cish3, SOCS-3, SSI-3, SSI3	suppressor of cytokine signaling 3	suppressor of cytokine signaling 3|STAT-induced STAT inhibitor 3|cytokine-inducible SH2 protein 3	17q25.3	17	NC_000017.11	78356778	78360925	minus	4	604176
9606	Homo sapiens	79001	0	live	VKORC1	EDTP308, MST134, MST576, VKCFD2, VKOR	vitamin K epoxide reductase complex subunit 1	vitamin K epoxide reductase complex subunit 1|phylloquinone epoxide reductase|vitamin K dependent clotting factors deficiency 2|vitamin K1 2,3-epoxide reductase subunit 1|vitamin K1 epoxide reductase (warfarin-sensitive)	16p11.2	16	NC_000016.10	31090854	31094797	minus	4	608547
9606	Homo sapiens	80339	0	live	PNPLA3	ADPN, C22orf20, iPLA(2)epsilon	patatin like phospholipase domain containing 3	1-acylglycerol-3-phosphate O-acyltransferase PNPLA3|acylglycerol O-acyltransferase|acylglycerol transacylase|adiponutrin|calcium-independent phospholipase A2-epsilon|iPLA2-epsilon|iPLA2epsilon|lysophosphatidic acid acyltransferase|patatin-like phospholipase domain-containing protein 3	22q13.31	22	NC_000022.11	43923805	43947582	plus	9	609567
10116	Rattus norvegicus	25664	0	live	Pparg	PPARgamma2	peroxisome proliferator-activated receptor gamma	peroxisome proliferator-activated receptor gamma|PPAR-gamma|nuclear receptor subfamily 1 group C member 3|peroxisome proliferator activator receptor, gamma	4q42	4	NC_051339.1	148423102	148548471	plus	10
9606	Homo sapiens	5340	0	live	PLG	HAE4	plasminogen	plasminogen|plasmin	6q26	6	NC_000006.12	160702193	160754097	plus	19	173350
9606	Homo sapiens	6382	0	live	SDC1	CD138, SDC, SYND1, syndecan	syndecan 1	syndecan-1|CD138 antigen|heparan sulfate proteoglycan fibroblast growth factor receptor|syndecan proteoglycan 1	2p24.1	2	NC_000002.12	20200797	20225475	minus	9	186355
9606	Homo sapiens	2078	0	live	ERG	erg-3, p55	ETS transcription factor ERG	transcriptional regulator ERG|ERG, ETS transcription factor|FUS/ERG fusion protein|TMPRSS2/ERG fusion|erythroblast transformation-specific transcription factor ERG variant 10|ets-related|transcriptional regulator ERG (transforming protein ERG)|v-ets avian erythroblastosis virus E26 oncogene homolog|v-ets avian erythroblastosis virus E26 oncogene related|v-ets erythroblastosis virus E26 oncogene h…	21q22.2	21	NC_000021.9	38367261	38661783	minus	17	165080
9606	Homo sapiens	84868	0	live	HAVCR2	CD366, HAVcr-2, KIM-3, SPTCL, TIM3, TIMD-3, TIMD3, Tim-3	hepatitis A virus cellular receptor 2	hepatitis A virus cellular receptor 2|T cell immunoglobulin mucin 3|T-cell immunoglobulin and mucin domain-containing protein 3|T-cell immunoglobulin mucin family member 3|T-cell immunoglobulin mucin receptor 3|T-cell membrane protein 3|kidney injury molecule-3	5q33.3	5	NC_000005.10	157085832	157109044	minus	7	606652
9606	Homo sapiens	2638	0	live	GC	DBP, DBP-maf, DBP/GC, GRD3, Gc-MAF, GcMAF, HEL-S-51, VDB, VDBG, VDBP	GC vitamin D binding protein	vitamin D-binding protein|epididymis secretory protein Li 51|gc protein-derived macrophage activating factor|gc-globulin|group-specific component (vitamin D binding protein)|vitamin D-binding alpha-globulin|vitamin D-binding protein-macrophage activating factor	4q13.3	4	NC_000004.12	71741693	71805520	minus	15	139200
9606	Homo sapiens	4684	0	live	NCAM1	CD56, MSK39, NCAM	neural cell adhesion molecule 1	neural cell adhesion molecule 1|antigen recognized by monoclonal antibody 5.1H11|neural cell adhesion molecule, NCAM	11q23.2	11	NC_000011.10	112961420	113278436	plus	25	116930
9606	Homo sapiens	7941	0	live	PLA2G7	LDL-PLA2, LP-PLA2, PAFAD, PAFAH	phospholipase A2 group VII	platelet-activating factor acetylhydrolase|1-alkyl-2-acetylglycerophosphocholine esterase|2-acetyl-1-alkylglycerophosphocholine esterase|LDL-PLA(2)|LDL-associated phospholipase A2|PAF 2-acylhydrolase|PAF acetylhydrolase|gVIIA-PLA2|group-VIIA phospholipase A2|lipoprotein-associated phospholipase A2|phospholipase A2, group VII (platelet-activating factor acetylhydrolase, plasma)	6p12.3	6	NC_000006.12	46700558	46735836	minus	13	601690
9606	Homo sapiens	8651	0	live	SOCS1	AISIMD, CIS1, CISH1, JAB, SOCS-1, SSI-1, SSI1, TIP-3, TIP3	suppressor of cytokine signaling 1	suppressor of cytokine signaling 1|JAK binding protein|STAT induced SH3 protein 1|STAT-induced STAT inhibitor 1|Tec-interacting protein 3|cytokine-inducible SH2 protein 1	16p13.13	16	NC_000016.10	11254417	11256204	minus	2	603597
9606	Homo sapiens	847	0	live	CAT		catalase	catalase|epididymis secretory sperm binding protein	11p13	11	NC_000011.10	34438934	34472060	plus	13	115500
9606	Homo sapiens	3456	0	live	IFNB1	IFB, IFF, IFN-beta, IFNB	interferon beta 1	interferon beta|fibroblast interferon|interferon, beta 1, fibroblast|interferon-beta	9p21.3	9	NC_000009.12	21077104	21077942	minus	1	147640
10090	Mus musculus	16163	0	live	Il13	Il-, Il-13	interleukin 13	interleukin-13|T-cell activation protein P600	11 31.98 cM	11	NC_000077.7	53522150	53525529	minus	4
9606	Homo sapiens	551	0	live	AVP	ADH, ARVP-NPII, AVRP, VP, AVP	arginine vasopressin	vasopressin-neurophysin 2-copeptin|antidiuretic hormone|copeptin|neurohypophyseal|prepro-AVP-NP II|prepro-arginine-vasopressin-neurophysin II|vasopressin-neurophysin II-copeptin	20p13	20	NC_000020.11	3082556	3093521	minus	4	192340
9606	Homo sapiens	406913	0	live	MIR126	MIRN126, miRNA126, mir-126	microRNA 126	hsa-mir-126	9q34.3	9	NC_000009.12	136670602	136670686	plus	1	611767
9606	Homo sapiens	252995	0	live	FNDC5	FRCP2, irisin	fibronectin type III domain containing 5	fibronectin type III domain-containing protein 5|fibronectin type III repeat-containing protein 2	1p35.1	1	NC_000001.11	32862268	32872484	minus	7	611906
9606	Homo sapiens	6606	0	live	SMN1	BCD541, GEMIN1, SMA, SMA1, SMA2, SMA3, SMA4, SMA@, SMN, SMNT, T-BCD541, TDRD16A	survival of motor neuron 1, telomeric	survival motor neuron protein|component of gems 1|gemin-1|survival motor neuron 1 protein|tudor domain containing 16A	5q13.2	5	NC_000005.10	70924941	70953015	plus	10	600354
9606	Homo sapiens	2194	0	live	FASN	FAS, OA-519, SDR27X1	fatty acid synthase	fatty acid synthase|short chain dehydrogenase/reductase family 27X, member 1|type I fatty acid synthase	17q25.3	17	NC_000017.11	82078338	82098303	minus	43	600212
9606	Homo sapiens	695	0	live	BTK	AGMX1, AT, ATK, BPK, IGHD3, IMD1, PSCTK1, XLA	Bruton tyrosine kinase	tyrosine-protein kinase BTK|B-cell progenitor kinase|Bruton agammaglobulinemia tyrosine kinase|Bruton's tyrosine kinase|agammaglobulinaemia tyrosine kinase|dominant-negative kinase-deficient Brutons tyrosine kinase|truncated Bruton agammaglobulinemia tyrosine kinase	Xq22.1	X	NC_000023.11	101349450	101390796	minus	21	300300
9606	Homo sapiens	407021	0	live	MIR29A	MIRN29, MIRN29A, hsa-mir-29, hsa-mir-29a, miRNA29A, mir-29a	microRNA 29a	microRNA 29	7q32.3	7	NC_000007.14	130876747	130876810	minus	1	610782
9606	Homo sapiens	462	0	live	SERPINC1	AT3, AT3D, ATIII, ATIII-R2, ATIII-T1, ATIII-T2, THPH7	serpin family C member 1	antithrombin-III|serine (or cysteine) proteinase inhibitor, clade C (antithrombin), member 1|serpin peptidase inhibitor clade C member 1|serpin peptidase inhibitor, clade C (antithrombin), member 1	1q25.1	1	NC_000001.11	173903800	173917327	minus	9	107300
9606	Homo sapiens	4586	0	live	MUC5AC	MUC5, TBM, leB, mucin	mucin 5AC, oligomeric mucus/gel-forming	mucin-5AC|gastric mucin|lewis B blood group antigen|major airway glycoprotein|mucin 5, subtypes A and C, tracheobronchial/gastric|mucin 5AC, oligomeric mucus/gel-forming pseudogene|mucin-5 subtype AC, tracheobronchial|tracheobronchial mucin	11p15.5	11	NC_000011.10	1157953	1201138	plus	49	158373
9606	Homo sapiens	9332	0	live	CD163	M130, MM130, SCARI1	CD163 molecule	scavenger receptor cysteine-rich type 1 protein M130|hemoglobin scavenger receptor|macrophage-associated antigen	12p13.31	12	NC_000012.12	7470811	7503808	minus	16	605545
9606	Homo sapiens	240	0	live	ALOX5	5-LO, 5-LOX, 5LPG, LOG5	arachidonate 5-lipoxygenase	polyunsaturated fatty acid 5-lipoxygenase|LOX-5|arachidonic acid 5-lipoxygenase|leukotriene A4 synthase	10q11.21	10	NC_000010.11	45374209	45446121	plus	13	152390
9606	Homo sapiens	8542	0	live	APOL1	APO-L, APOL, APOL-I, FSGS4	apolipoprotein L1	apolipoprotein L1|apolipoprotein L 1|apolipoprotein L1-B3	22q12.3	22	NC_000022.11	36253071	36267531	plus	8	603743
9606	Homo sapiens	3439	0	live	IFNA1	IFL, IFN, IFN-ALPHA, IFN-alphaD3, IFNA@, leIF D, IFNA1	interferon alpha 1	interferon alpha-1/13|IFN-alpha-1/13|interferon alpha 1b|interferon alpha-D|interferon-alpha1	9p21.3	9	NC_000009.12	21440439	21441316	plus	1	147660
9606	Homo sapiens	3574	0	live	IL7	IL-7	interleukin 7	interleukin-7	8q21.13	8	NC_000008.11	78675870	78806830	minus	8	146660
9606	Homo sapiens	54209	0	live	TREM2	PLOSL2, TREM-2, Trem2a, Trem2b, Trem2c	triggering receptor expressed on myeloid cells 2	triggering receptor expressed on myeloid cells 2|triggering receptor expressed on monocytes 2|triggering receptor expressed on myeloid cells 2a	6p21.1	6	NC_000006.12	41158508	41163116	minus	5	605086
9606	Homo sapiens	6441	0	live	SFTPD	COLEC7, PSP-D, SFTP4, SP-D	surfactant protein D	pulmonary surfactant-associated protein D|collectin-7|lung surfactant protein D|pulmonary surfactant apoprotein|surfactant-associated protein, pulmonary 4	10q22.3	10	NC_000010.11	79937740	79982236	minus	9	178635
9606	Homo sapiens	1437	0	live	CSF2	CSF, GMCSF	colony stimulating factor 2	granulocyte-macrophage colony-stimulating factor|colony stimulating factor 2 (granulocyte-macrophage)|granulocyte macrophage-colony stimulating factor|molgramostim|molgramostin|sargramostim	5q31.1	5	NC_000005.10	132073789	132076170	plus	4	138960
9606	Homo sapiens	64135	0	live	IFIH1	AGS7, Hlcd, IDDM19, MDA-5, MDA5, RLR-2, SGMRT1	interferon induced with helicase C domain 1	interferon-induced helicase C domain-containing protein 1|CADM-140 autoantigen|DEAD/H (Asp-Glu-Ala-Asp/His) box polypeptide|RIG-I-like receptor 2|RNA helicase-DEAD box protein 116|clinically amyopathic dermatomyositis autoantigen 140 kDa|helicard|helicase with 2 CARD domains|melanoma differentiation-associated gene 5|melanoma differentiation-associated protein 5|murabutide down-regulated protein	2q24.2	2	NC_000002.12	162267074	162318684	minus	16	606951
9606	Homo sapiens	5972	0	live	REN	ADTKD4, HNFJ2, RTD	renin	renin|angiotensin-forming enzyme|angiotensinogenase|renin precursor, renal	1q32.1	1	NC_000001.11	204154819	204166337	minus	10	179820
9606	Homo sapiens	710	0	live	SERPING1	C1IN, C1INH, C1NH, HAE1, HAE2	serpin family G member 1	plasma protease C1 inhibitor|C1 esterase inhibitor|C1-inhibiting factor|C1-inhibitor|complement component 1 inhibitor|epididymis secretory sperm binding protein|serine/cysteine proteinase inhibitor clade G member 1|serpin G1|serpin peptidase inhibitor clade G member 1|serpin peptidase inhibitor, clade G (C1 inhibitor), member 1	11q12.1	11	NC_000011.10	57597685	57614848	plus	8	606860
9606	Homo sapiens	340061	0	live	STING1	ERIS, MITA, MPYS, NET23, SAVI, STING, STING-beta, TMEM173, hMITA, hSTING	stimulator of interferon response cGAMP interactor 1	stimulator of interferon genes protein|N-terminal methionine-proline-tyrosine-serine plasma membrane tetraspanner|endoplasmic reticulum IFN stimulator|endoplasmic reticulum interferon stimulator|mitochondrial mediator of IRF3 activation|stimulator of interferon protein|transmembrane protein 173	5q31.2	5	NC_000005.10	139475533	139482758	minus	9	612374
9606	Homo sapiens	407035	0	live	MIR31	MIRN31, hsa-mir-31, miR-31	microRNA 31		9p21.3	9	NC_000009.12	21512115	21512185	minus	1	612155
9606	Homo sapiens	3939	0	live	LDHA	GSD11, HEL-S-133P, LDHM, PIG19	lactate dehydrogenase A	L-lactate dehydrogenase A chain|LDH muscle subunit|LDH-A|LDH-M|cell proliferation-inducing gene 19 protein|epididymis secretory sperm binding protein Li 133P|lactate dehydrogenase M|proliferation-inducing gene 19|renal carcinoma antigen NY-REN-59	11p15.1	11	NC_000011.10	18394563	18408425	plus	9	150000
9606	Homo sapiens	468	0	live	ATF4	CREB-2, CREB2, TAXREB67, TXREB	activating transcription factor 4	cyclic AMP-dependent transcription factor ATF-4|DNA-binding protein TAXREB67|cAMP response element-binding protein 2|cAMP-dependent transcription factor ATF-4|cAMP-responsive element-binding protein 2|cyclic AMP-responsive element-binding protein 2|tax-responsive enhancer element B67|tax-responsive enhancer element-binding protein 67	22q13.1	22	NC_000022.11	39514494	39522686	plus	3	604064
9606	Homo sapiens	186	0	live	AGTR2	AT2, ATGR2, MRX88	angiotensin II receptor type 2	type-2 angiotensin II receptor|angiotensin II type-2 receptor	Xq23	X	NC_000023.11	116170744	116174974	plus	3	300034
9606	Homo sapiens	727	0	live	C5	C5Da, C5b, CPAMD4, ECLZB, C5	complement C5	complement C5|C3 and PZP-like alpha-2-macroglobulin domain-containing protein 4|C5a anaphylatoxin|anaphylatoxin C5a analog|complement component 5|prepro-C5	9q33.2	9	NC_000009.12	120952335	121074865	minus	43	120900
9606	Homo sapiens	6364	0	live	CCL20	CKb4, Exodus, LARC, MIP-3-alpha, MIP-3a, MIP3A, SCYA20, ST38	C-C motif chemokine ligand 20	C-C motif chemokine 20|CC chemokine LARC|beta chemokine exodus-1|chemokine (C-C motif) ligand 20|liver and activation-regulated chemokine|macrophage inflammatory protein 3 alpha|small inducible cytokine subfamily A (Cys-Cys), member 20|small-inducible cytokine A20	2q36.3	2	NC_000002.12	227813842	227817556	plus	4	601960
9606	Homo sapiens	5196	0	live	PF4	CXCL4, PF-4, SCYB4	platelet factor 4	platelet factor 4|C-X-C motif chemokine 4|chemokine (C-X-C motif) ligand 4|iroplact|oncostatin-A	4q13.3	4	NC_000004.12	73980811	73982124	minus	3	173460
9606	Homo sapiens	6348	0	live	CCL3	G0S19-1, LD78ALPHA, MIP-1-alpha, MIP1A, SCYA3	C-C motif chemokine ligand 3	C-C motif chemokine 3|G0/G1 switch regulatory protein 19-1|PAT 464.1|SIS-beta|macrophage inflammatory protein 1-alpha|small inducible cytokine A3 (homologous to mouse Mip-1a)|tonsillar lymphocyte LD78 alpha protein	17q12	17	NC_000017.11	36088256	36090143	minus	2	182283
9606	Homo sapiens	2169	0	live	FABP2	FABPI, I-FABP	fatty acid binding protein 2	fatty acid-binding protein, intestinal|fatty acid binding protein 2, intestinal|intestinal-type fatty acid-binding protein	4q26	4	NC_000004.12	119317250	119322138	minus	4	134640
9606	Homo sapiens	8989	0	live	TRPA1	ANKTM1, FEPS, FEPS1	transient receptor potential cation channel subfamily A member 1	transient receptor potential cation channel subfamily A member 1|ankyrin-like with transmembrane domains 1|transformation-sensitive protein p120|wasabi receptor	8q21.11	8	NC_000008.11	72021250	72094885	minus	29	604775
9606	Homo sapiens	6402	0	live	SELL	CD62L, LAM1, LECAM1, LEU8, LNHR, LSEL, LYAM1, PLNHR, TQ1	selectin L	L-selectin|CD62 antigen-like family member L|gp90-MEL|leukocyte surface antigen Leu-8|leukocyte-endothelial cell adhesion molecule 1|lymph node homing receptor|lymphocyte adhesion molecule 1|pln homing receptor	1q24.2	1	NC_000001.11	169690667	169711620	minus	9	153240
9606	Homo sapiens	5168	0	live	ENPP2	ATX, ATX-X, AUTOTAXIN, LysoPLD, NPP2, PD-IALPHA, PDNP2	ectonucleotide pyrophosphatase/phosphodiesterase 2	ectonucleotide pyrophosphatase/phosphodiesterase family member 2|E-NPP 2|autotaxin-t|extracellular lysophospholipase D|phosphodiesterase I/nucleotide pyrophosphatase 2|plasma lysophospholipase D	8q24.12	8	NC_000008.11	119557085	119673404	minus	29	601060
9606	Homo sapiens	3965	0	live	LGALS9	HUATA, LGALS9	galectin 9	galectin-9|ecalectin|gal-9|lectin, galactoside-binding, soluble, 9|tumor antigen HOM-HD-21|urate transporter/channel protein	17q11.2	17	NC_000017.11	27631172	27649560	plus	12	601879
9606	Homo sapiens	6649	0	live	SOD3	EC-SOD	superoxide dismutase 3	extracellular superoxide dismutase [Cu-Zn]|superoxide dismutase 3, extracellular|testicular tissue protein Li 175	4p15.2	4	NC_000004.12	24795478	24800845	plus	3	185490
9606	Homo sapiens	2512	0	live	FTL	LFTD, NBIA3	ferritin light chain	ferritin light chain|epididymis secretory sperm binding protein|ferritin L subunit|ferritin L-chain|ferritin light polypeptide-like 3|ferritin, light polypeptide	19q13.33	19	NC_000019.10	48965309	48966879	plus	4	134790
9606	Homo sapiens	11082	0	live	ESM1	endocan	endothelial cell specific molecule 1	endothelial cell-specific molecule 1|ESM-1	5q11.2	5	NC_000005.10	54977867	54985593	minus	3	601521
9606	Homo sapiens	2209	0	live	FCGR1A	CD64, CD64A, FCRI, FcgammaRI, IGFR1	Fc fragment of IgG receptor Ia	high affinity immunoglobulin gamma Fc receptor I|Fc fragment of IgG, high affinity Ia, receptor (CD64)|Fc fragment of IgG, high affinity Ia, receptor for (CD64)|Fc gamma receptor Ia|Fc-gamma RI|Fc-gamma receptor I A1|IgG Fc receptor I|fc-gamma RIA|fcgammaRIa	1q21.2	1	NC_000001.11	149782694	149800609	plus	8	146760
9606	Homo sapiens	574411	0	live	MIR451A	MIR451, MIRN451, hsa-mir-451, hsa-mir-451a, mir-451a	microRNA 451a	microRNA 451	17q11.2	17	NC_000017.11	28861369	28861440	minus	1	612071
9606	Homo sapiens	6351	0	live	CCL4	ACT2, AT744.1, G-26, HC21, LAG-1, LAG1, MIP-1-beta, MIP1B, MIP1B1, SCYA2, SCYA4	C-C motif chemokine ligand 4	C-C motif chemokine 4|G-26 T-lymphocyte-secreted protein|MIP-1-beta(1-69)|PAT 744|SIS-gamma|T-cell activation protein 2|chemokine (C-C motif) ligand 4|lymphocyte activation gene 1 protein|macrophage inflammatory protein 1-beta|secreted protein G-26|small inducible cytokine A4 (homologous to mouse Mip-1b)	17q12	17	NC_000017.11	36103827	36105614	plus	3	182284
9606	Homo sapiens	6721	0	live	SREBF2	SREBP-2, SREBP2, bHLHd2	sterol regulatory element binding transcription factor 2	sterol regulatory element-binding protein 2|class D basic helix-loop-helix protein 2	22q13.2	22	NC_000022.11	41833105	41907308	plus	24	600481
9606	Homo sapiens	1235	0	live	CCR6	BN-1, C-C CKR-6, CC-CKR-6, CCR-6, CD196, CKR-L3, CKRL3, CMKBR6, DCR2, DRY6, GPR29, GPRCY4, STRL22	C-C motif chemokine receptor 6	C-C chemokine receptor type 6|G protein-coupled receptor 29|LARC receptor|chemokine (C-C motif) receptor 6|chemokine (C-C) receptor 6|chemokine receptor-like 3|seven-transmembrane receptor, lymphocyte, 22	6q27	6	NC_000006.12	167111795	167139141	plus	5	601835
9606	Homo sapiens	6439	0	live	SFTPB	PSP-B, SFTB3, SFTP3, SMDP1, SP-B	surfactant protein B	pulmonary surfactant-associated protein B|18 kDa pulmonary-surfactant protein|6 kDa protein|pulmonary surfactant-associated proteolipid SPL(Phe)	2p11.2	2	NC_000002.12	85657307	85668741	minus	14	178640
9606	Homo sapiens	406903	0	live	MIR10B	MIRN10B, hsa-mir-10b, miRNA10B, mir-10b	microRNA 10b		2q31.1	2	NC_000002.12	176150303	176150412	plus	1	611576
9606	Homo sapiens	406	0	live	ARNTL	BMAL1, BMAL1c, JAP3, MOP3, PASD3, TIC, bHLHe5	aryl hydrocarbon receptor nuclear translocator like	aryl hydrocarbon receptor nuclear translocator-like protein 1|ARNT-like protein 1, brain and muscle|PAS domain containing 3|PAS domain-containing protein 3|bHLH-PAS protein JAP3|basic helix-loop-helix family member e5|basic-helix-loop-helix-PAS orphan MOP3|basic-helix-loop-helix-PAS protein MOP3|brain and muscle ARNT-like 1|class E basic helix-loop-helix protein 5|member of PAS protein 3|member o…	11p15.3	11	NC_000011.10	13276552	13387268	plus	25	602550
9606	Homo sapiens	728	0	live	C5AR1	C5A, C5AR, C5R1, CD88	complement C5a receptor 1	C5a anaphylatoxin chemotactic receptor 1|C5a anaphylatoxin receptor|C5a ligand|C5a-R|complement component 5a receptor 1	19q13.32	19	NC_000019.10	47309861	47322066	plus	3	113995
9606	Homo sapiens	6361	0	live	CCL17	A-152E5.3, ABCD-2, SCYA17, TARC	C-C motif chemokine ligand 17	C-C motif chemokine 17|CC chemokine TARC|T cell-directed CC chemokine|chemokine (C-C motif) ligand 17|small inducible cytokine subfamily A (Cys-Cys), member 17|small-inducible cytokine A17|thymus and activation-regulated chemokine	16q21	16	NC_000016.10	57396076	57416063	plus	6	601520
9606	Homo sapiens	7066	0	live	THPO	MGDF, MKCSF, ML, MPLLG, THCYT1, TPO	thrombopoietin	thrombopoietin|MPL ligand|c-mpl ligand|megakaryocyte colony-stimulating factor|megakaryocyte growth and development factor|megakaryocyte stimulating factor|myeloproliferative leukemia virus oncogene ligand|prepro-thrombopoietin	3q27.1	3	NC_000003.12	184371935	184379688	minus	7	600044
9606	Homo sapiens	6283	0	live	S100A12	CAAF1, CAGC, CGRP, ENRAGE, MRP-6, MRP6, p6	S100 calcium binding protein A12	protein S100-A12|EN-RAGE|calcitermin|calcium-binding protein in amniotic fluid 1|calgranulin C|extracellular newly identified RAGE-binding protein|migration inhibitory factor-related protein 6|neutrophil S100 protein	1q21.3	1	NC_000001.11	153373711	153375621	minus	3	603112
9606	Homo sapiens	10365	0	live	KLF2	LKLF	Kruppel like factor 2	Krueppel-like factor 2|Kruppel-like factor 2 (lung)|Kruppel-like factor LKLF|lung Kruppel-like factor|lung Kruppel-like zinc finger transcription factor|lung krueppel-like factor	19p13.11	19	NC_000019.10	16324826	16328685	plus	3	602016
9606	Homo sapiens	10280	0	live	SIGMAR1	ALS16, DSMA2, OPRS1, SIG-1R, SR-BP, SR-BP1, SRBP, hSigmaR1, sigma1R	sigma non-opioid intracellular receptor 1	sigma non-opioid intracellular receptor 1|SR31747 binding protein 1|aging-associated gene 8 protein|sigma 1-type opioid receptor	9p13.3	9	NC_000009.12	34634722	34637787	minus	4	601978
9606	Homo sapiens	2357	0	live	FPR1	FMLP, FPR	formyl peptide receptor 1	fMet-Leu-Phe receptor|N-formylpeptide chemoattractant receptor|fMLP receptor	19q13.41	19	NC_000019.10	51745172	51751878	minus	3	136537
9606	Homo sapiens	8828	0	live	NRP2	NP2, NPN2, PRO2714, VEGF165R2	neuropilin 2	neuropilin-2|neuropilin-2a(17)|neuropilin-2a(22)|neuropilin-2b(0)|receptor for VEGF165 and semaphorins class3|vascular endothelial cell growth factor 165 receptor 2	2q33.3	2	NC_000002.12	205682501	205798131	plus	20	602070
9606	Homo sapiens	4938	0	live	OAS1	E18/E16, IFI-4, OIAS, OIASI	2'-5'-oligoadenylate synthetase 1	2'-5'-oligoadenylate synthase 1|(2-5')oligo(A) synthase 1|2',5'-oligo A synthetase 1|2'-5'-oligoadenylate synthetase 1, 40/46kDa|2'-5'-oligoisoadenylate synthetase 1|2-5A synthase 1|2-5A synthetase 1|E16 (2'-5') oligo A synthetase	12q24.13	12	NC_000012.12	112906956	112933219	plus	8	164350
9606	Homo sapiens	5048	0	live	PAFAH1B1	LIS1, LIS2, MDCR, MDS, NudF, PAFAH	platelet activating factor acetylhydrolase 1b regulatory subunit 1	platelet-activating factor acetylhydrolase IB subunit beta|lissencephaly 1 protein|platelet-activating factor acetylhydrolase 1b, regulatory subunit 1 (45kDa)	17p13.3	17	NC_000017.11	2593210	2685617	plus	16	601545
9606	Homo sapiens	282618	0	live	IFNL1	IL-29, IL29	interferon lambda 1	interferon lambda-1|IFN-lambda-1|cytokine Zcyto21|interleukin 29 (interferon, lambda 1)|interleukin-29	19q13.2	19	NC_000019.10	39296407	39298673	plus	5	607403
9606	Homo sapiens	1230	0	live	CCR1	CD191, CKR-1, CKR1, CMKBR1, HM145, MIP1aR, SCYAR1	C-C motif chemokine receptor 1	C-C chemokine receptor type 1|C-C CKR-1|CC-CKR-1|CCR-1|LD78 receptor|MIP-1alpha-R|RANTES receptor|RANTES-R|chemokine (C-C motif) receptor 1|macrophage inflammatory protein 1-alpha receptor	3p21.31	3	NC_000003.12	46201711	46208313	minus	2	601159
9606	Homo sapiens	6386	0	live	SDCBP	MDA-9, MDA9, ST1, SYCL, TACIP18	syndecan binding protein	syntenin-1|melanoma differentiation associated protein-9|pro-TGF-alpha cytoplasmic domain-interacting protein 18|scaffold protein Pbp1|syndecan binding protein (syntenin)|syndecan-binding protein 1	8q12.1	8	NC_000008.11	58553261	58582860	plus	10	602217
9606	Homo sapiens	8740	0	live	TNFSF14	CD258, HVEML, LIGHT, LTg	TNF superfamily member 14	tumor necrosis factor ligand superfamily member 14|herpesvirus entry mediator ligand|tumor necrosis factor (ligand) superfamily, member 14|tumor necrosis factor ligand 1D|tumor necrosis factor superfamily member 14	19p13.3	19	NC_000019.10	6658126	6670595	minus	6	604520
9606	Homo sapiens	30816	0	live	ERVW-1	ENV, ENVW, ERVWE1, HERV-7q, HERV-W-ENV, HERV7Q, HERVW, HERVWENV	endogenous retrovirus group W member 1, envelope	syncytin-1|HERV-7q envelope protein|HERV-W Env glycoprotein|HERV-W envelope protein|HERV-W_7q21.2 provirus ancestral Env polyprotein|HERV-tryptophan envelope protein|endogenous retroviral family W, env(C7), member 1|endogenous retrovirus group W, member 1|envelope glycoprotein|envelope polyprotein gPr73|enverin|human endogenous retrovirus W envC7-1 envelope protein	7q21.2	7	NC_000007.14	92468380	92477946	minus	2	604659
9606	Homo sapiens	3902	0	live	LAG3	CD223	lymphocyte activating 3	lymphocyte activation gene 3 protein|lymphocyte-activation gene 3	12p13.31	12	NC_000012.12	6772483	6778455	plus	8	153337
9606	Homo sapiens	4094	0	live	MAF	AYGRP, CCA4, CTRCT21, c-MAF	MAF bZIP transcription factor	transcription factor Maf|Avian musculoaponeurotic fibrosarcoma (MAF) protooncogene|T lymphocyte c-maf long form|c-maf proto-oncogene|proto-oncogene c-Maf|v-maf avian musculoaponeurotic fibrosarcoma oncogene homolog	16q23.2	16	NC_000016.10	79202624	79601952	minus	7	177075
9606	Homo sapiens	3455	0	live	IFNAR2	IFN-R, IFN-alpha-REC, IFNABR, IFNARB, IMD45	interferon alpha and beta receptor subunit 2	interferon alpha/beta receptor 2|IFN-R-2|IFN-alpha/beta receptor 2|IFNalpha/beta receptor subunit 2|human interferon alpha/beta receptor|interferon (alpha, beta and omega) receptor 2|interferon alpha binding protein|interferon receptor|interferon-alpha/beta receptor beta chain|type I interferon receptor 2	21q22.11	21	NC_000021.9	33229938	33265664	plus	9	602376
9606	Homo sapiens	115650	0	live	TNFRSF13C	BAFF-R, BAFFR, BROMIX, CD268, CVID4, prolixin	TNF receptor superfamily member 13C	tumor necrosis factor receptor superfamily member 13C|B cell-activating factor receptor|BAFF receptor|BLyS receptor 3	22q13.2	22	NC_000022.11	41922032	41926806	minus	3	606269
9606	Homo sapiens	3702	0	live	ITK	EMT, LPFS1, LYK, PSCTK2	IL2 inducible T cell kinase	tyrosine-protein kinase ITK/TSK|IL-2-inducible T-cell kinase|T-cell-specific kinase|homolog of mouse T-cell itk/tsk|interleukin-2-inducible T-cell kinase|kinase EMT|tyrosine-protein kinase LYK	5q33.3	5	NC_000005.10	157180840	157255185	plus	18	186973
9606	Homo sapiens	9935	0	live	MAFB	DURS3, KRML, MCTO	MAF bZIP transcription factor B	transcription factor MafB|Kreisler maf-related leucine zipper homolog|MAFB/Kreisler basic region/leucine zipper transcription factor|v-maf avian musculoaponeurotic fibrosarcoma oncogene homolog B	20q12	20	NC_000020.11	40685848	40689236	minus	1	608968
9606	Homo sapiens	11251	0	live	PTGDR2	CD294, CRTH2, DL1R, DP2, GPR44	prostaglandin D2 receptor 2	prostaglandin D2 receptor 2|G-protein coupled receptor 44|chemoattractant receptor homologous molecule expressed on T helper type 2 cells|chemoattractant receptor-homologous molecule expressed on TH2 cells|putative G-protein coupled receptor 44	11q12.2	11	NC_000011.10	60850933	60855950	minus	2	604837
9606	Homo sapiens	201294	0	live	UNC13D	FHL3, HLH3, HPLH3, Munc13-4	unc-13 homolog D	protein unc-13 homolog D	17q25.1	17	NC_000017.11	75827225	75844404	minus	32	608897
9606	Homo sapiens	56829	0	live	ZC3HAV1	ARTD13, FLB6421, PARP13, ZAP, ZC3H2, ZC3HDC2	zinc finger CCCH-type containing, antiviral 1	zinc finger CCCH-type antiviral protein 1|ADP-ribosyltransferase diphtheria toxin-like 13|inactive Poly [ADP-ribose] polymerase 13|zinc finger CCCH domain-containing protein 2|zinc finger CCCH-type, antiviral 1	7q34	7	NC_000007.14	139043515	139109720	minus	13	607312
9606	Homo sapiens	6354	0	live	CCL7	FIC, MARC, MCP-3, MCP3, NC28, SCYA6, SCYA7	C-C motif chemokine ligand 7	C-C motif chemokine 7|chemokine (C-C motif) ligand 7|monocyte chemoattractant protein 3|monocyte chemotactic protein 3|small inducible cytokine A7 (monocyte chemotactic protein 3)|small-inducible cytokine A7	17q12	17	NC_000017.11	34270221	34272242	plus	3	158106
9606	Homo sapiens	100507246	0	live	SNHG16	Nbla10727, Nbla12061, ncRAN	small nucleolar RNA host gene 16	non-coding RNA expressed in aggressive neuroblastoma|small nucleolar RNA host gene 16 (non-protein coding)	17q25.1	17	NC_000017.11	76557764	76565348	plus	4
9606	Homo sapiens	10803	0	live	CCR9	CC-CKR-9, CDw199, GPR-9-6, GPR28	C-C motif chemokine receptor 9	C-C chemokine receptor type 9|G protein-coupled receptor 28|chemokine (C-C motif) receptor 9	3p21.31	3	NC_000003.12	45886064	45903174	plus	6	604738
10116	Rattus norvegicus	57027	0	live	Adam17	TACE	ADAM metallopeptidase domain 17	disintegrin and metalloproteinase domain-containing protein 17|ADAM 17|TNF-alpha convertase|TNF-alpha-converting enzyme|a disintegrin and metallopeptidase domain 17|a disintegrin and metalloprotease domain 17|a disintegrin and metalloproteinase domain 17 (tumor necrosis factor, alpha, converting enzyme)	6q16	6	NC_051341.1	40872936	40920700	minus	19
9606	Homo sapiens	3001	0	live	GZMA	CTLA3, HFSP	granzyme A	granzyme A|CTL tryptase|Cytotoxic T-lymphocyte-associated serine esterase-3|Granzyme A (Cytotoxic T-lymphocyte-associated serine esterase-3; Hanukah factor serine protease)|HF|Hanukah factor serine protease)|cytotoxic T-lymphocyte proteinase 1|fragmentin-1|granzyme 1|granzyme A (granzyme 1, cytotoxic T-lymphocyte-associated serine esterase 3)|h factor	5q11.2	5	NC_000005.10	55102646	55110252	plus	5	140050
9606	Homo sapiens	3588	0	live	IL10RB	CDW210B, CRF2-4, CRFB4, D21S58, D21S66, IL-10R2	interleukin 10 receptor subunit beta	interleukin-10 receptor subunit beta|IL-10 receptor subunit beta|IL-10R subunit 2|IL-10R subunit beta|IL-10RB|cytokine receptor class-II CRF2-4|cytokine receptor class-II member 4|cytokine receptor family 2 member 4|cytokine receptor family II, member 4|interleukin 10 receptor, beta|interleukin-10 receptor subunit 2	21q22.11	21	NC_000021.9	33266367	33297221	plus	7	123889
9606	Homo sapiens	84864	0	live	RIOX2	JMJD10, MDIG, MINA, MINA53, NO52, ROX	ribosomal oxygenase 2	ribosomal oxygenase 2|60S ribosomal protein L27a histidine hydroxylase|MYC induced nuclear antigen|MYC-induced nuclear antigen 53|bifunctional lysine-specific demethylase and histidyl-hydroxylase MINA|histone lysine demethylase MINA|mineral dust induced gene protein|myc-induced nuclear antigen, 53 kDa|nucleolar protein 52|ribosomal oxygenase MINA	3q11.2	3	NC_000003.12	97941818	97972431	minus	13	612049
9606	Homo sapiens	3822	0	live	KLRC2	CD159c, NKG2-C, NKG2C	killer cell lectin like receptor C2	NKG2-C type II integral membrane protein|CD159 antigen-like family member C|NK cell receptor C|NKG2-C-activating NK receptor|killer cell lectin-like receptor subfamily C, member 2|natural killer cell receptor G2-C	12p13.2	12	NC_000012.12	10430599	10436010	minus	6	602891
9606	Homo sapiens	4142	0	live	MAS1	MAS, MGRA	MAS1 proto-oncogene, G protein-coupled receptor	proto-oncogene Mas|MAS1 oncogene|Mas-related G protein-coupled receptor A	6q25.3	6	NC_000006.12	159890988	159917447	plus	3	165180
9606	Homo sapiens	641638	0	live	SNHG6	HBII-276HG, NCRNA00058, U87HG	small nucleolar RNA host gene 6	HBII-276 host|U87 host|small nucleolar RNA host gene (non-protein coding) 6	8q13	8	NC_000008.11	66921690	66925541	minus	4	612215
9606	Homo sapiens	8546	0	live	AP3B1	ADTB3, ADTB3A, HPS, HPS2, PE	adaptor related protein complex 3 subunit beta 1	AP-3 complex subunit beta-1|AP-3 complex beta-3A subunit|adaptor protein complex AP-3 subunit beta-1|adaptor related protein complex 3 beta 1 subunit|beta-3A|beta-3A-adaptin|clathrin assembly protein complex 3 beta-1 large chain	5q14.1	5	NC_000005.10	78000522	78294704	minus	29	603401
9606	Homo sapiens	89832	0	live	CHRFAM7A	CHRNA7, CHRNA7-DR1, D-10, NACHRA7	CHRNA7 (exons 5-10) and FAM7A (exons A-E) fusion	CHRNA7-FAM7A fusion protein|CHRNA7 (cholinergic receptor, nicotinic, alpha 7, exons 5-10) and FAM7A (family with sequence similarity 7A, exons A-E) fusion|CHRNA7 (cholinergic receptor, nicotinic, alpha polypeptide 7, exons 5-10) and FAM7A (family with sequence similarity 7A, exons A-E) fusion|Neuronal acetylcholine receptor subunit alpha-7|alpha 7 neuronal nicotinic acetylcholine receptor-FAM7A h…	15q13.2	15	NC_000015.10	30360566	30393849	minus	12	609756
10090	Mus musculus	50528	0	live	Tmprss2	D16Ertd61, D16Ertd61e	transmembrane protease, serine 2	transmembrane protease serine 2|epitheliasin|plasmic transmembrane protein X	16 57.53 cM	16	NC_000082.7	97365882	97460741	minus	16
9606	Homo sapiens	9934	0	live	P2RY14	BPR105, GPR105, P2Y14	purinergic receptor P2Y14	P2Y purinoceptor 14|G protein coupled receptor for UDP-glucose|G-protein coupled receptor 105|P2Y(14) receptor|P2Y14 receptor|UDP-glucose receptor|purinergic receptor P2Y, G-protein coupled, 14	3q25.1	3	NC_000003.12	151212115	151279167	minus	6	610116
9606	Homo sapiens	7135	0	live	TNNI1	SSTNI, TNN1	troponin I1, slow skeletal type	troponin I, slow skeletal muscle|troponin I type 1 (skeletal, slow)	1q32.1	1	NC_000001.11	201403784	201421730	minus	9	191042
9606	Homo sapiens	2028	0	live	ENPEP	APA, CD249, gp160	glutamyl aminopeptidase	glutamyl aminopeptidase|AP-A|EAP|aminopeptidase A|differentiation antigen gp160	4q25	4	NC_000004.12	110476155	110565285	plus	24	138297
9606	Homo sapiens	282616	0	live	IFNL2	IFNL2a, IFNL3a, IL-28A, IL28A	interferon lambda 2	interferon lambda-2|IFN-lambda-2|cytokine Zcyto20|interleukin 28A (interferon, lambda 2)|interleukin-28A	19q13.2	19	NC_000019.10	39268396	39270188	plus	6	607401
9606	Homo sapiens	9246	0	live	UBE2L6	RIG-B, UBCH8	ubiquitin conjugating enzyme E2 L6	ubiquitin/ISG15-conjugating enzyme E2 L6|E2 ubiquitin-conjugating enzyme L6|retinoic acid induced gene B protein|ubiquitin carrier protein L6|ubiquitin conjugating enzyme E2L 6|ubiquitin-protein ligase L6	11q12.1	11	NC_000011.10	57551662	57567935	minus	5	603890
9606	Homo sapiens	1359	0	live	CPA3	MC-CPA	carboxypeptidase A3	mast cell carboxypeptidase A|carboxypeptidase A3 (mast cell)|tissue carboxypeptidase A	3q24	3	NC_000003.12	148865296	148897203	plus	11	114851
9606	Homo sapiens	64783	0	live	RBM15	OTT, OTT1, SPEN	RNA binding motif protein 15	RNA-binding protein 15|one twenty two protein|one twenty-two|one-twenty two protein 1|putative RNA-binding protein 15	1p13.3	1	NC_000001.11	110339377	110346677	plus	3	606077
9606	Homo sapiens	405754	0	live	ERVFRD-1	ERVFRDE1, GLLL6191, HERV-FRD, HERV-W/FRD, UNQ6191, envFRD	endogenous retrovirus group FRD member 1, envelope	syncytin-2|HERV-FRD provirus ancestral Env polyprotein|HERV-FRD_6p24.1 provirus ancestral Env polyprotein|endogenous retrovirus group FRD, member 1|envelope polyprotein|syncytin 2	6p24.2	6	NC_000006.12	11102489	11111725	minus	2	610524
9606	Homo sapiens	54625	0	live	PARP14	ARTD8, BAL2, PARP-14, pART8	poly(ADP-ribose) polymerase family member 14	protein mono-ADP-ribosyltransferase PARP14|ADP-ribosyltransferase diphtheria toxin-like 8|B-aggressive lymphoma 2|b aggressive lymphoma protein 2|collaborator of STAT6|poly [ADP-ribose] polymerase 14	3q21.1	3	NC_000003.12	122680726	122730840	plus	17	610028
9606	Homo sapiens	340024	0	live	SLC6A19	B0AT1, HND	solute carrier family 6 member 19	sodium-dependent neutral amino acid transporter B(0)AT1|sodium-dependent amino acid transporter system B0|solute carrier family 6 (neurotransmitter transporter), member 19|solute carrier family 6 (neutral amino acid transporter), member 19|system B(0) neutral amino acid transporter AT1|system B0 neutral amino acid transporter	5p15.33	5	NC_000005.10	1201595	1225111	plus	12	608893
9606	Homo sapiens	1993	0	live	ELAVL2	HEL-N1, HELN1, HUB	ELAV like RNA binding protein 2	ELAV-like protein 2|ELAV (embryonic lethal, abnormal vision, Drosophila)-like 2 (Hu antigen B)|ELAV like neuron-specific RNA binding protein 2|hu-antigen B|nervous system-specific RNA-binding protein Hel-N1	9p21.3	9	NC_000009.12	23690099	23850601	minus	20	601673
9606	Homo sapiens	117600004	0	live	LOC117600004		CTSL promoter region	cathepsin L promoter	9q	9	NC_000009.12	87724325	87727604	plus	0
9606	Homo sapiens	117134608	0	live	LOC117134608		TMPRSS2 androgen receptor-responsive -13 kb enhancer	TMPRSS2 -13 kb AR-responsive enhancer|TMPRSS2 B39 enhancer|TMPRSS2 E1 enhancer	21q	21	NC_000021.9	41519077	41522416	plus	0
9606	Homo sapiens	111832671	0	live	LOC111832671		albumin (ALB) 5' regulatory region		4q13	4	NC_000004.12	73397685	73404342	plus	0
9606	Homo sapiens	117134604	0	live	LOC117134604		TMPRSS2 promoter region	TMPRSS2 regulatory region N	21q	21	NC_000021.9	41507255	41509135	plus	0
9606	Homo sapiens	100302175	0	live	MIR1207	MIRN1207, hsa-mir-1207	microRNA 1207		8q24.21	8	NC_000008.11	128049152	128049238	plus	1
9606	Homo sapiens	106128901	0	live	TH2-LCR		Th2 cytokine locus control region	T helper type 2 cytokine LCR	5q31	5	NC_000005.10	132629263	132642195	plus	0
9606	Homo sapiens	117135106	0	live	LOC117135106		TMPRSS2 androgen receptor-responsive -60 kb enhancer	TMPRSS2 -60 kb AR-responsive enhancer	21q	21	NC_000021.9	41568581	41569154	plus	0
9606	Homo sapiens	117135105	0	live	LOC117135105		TMPRSS2 E4 enhancer		21q	21	NC_000021.9	41535944	41536955	plus	0
9606	Homo sapiens	117135104	0	live	LOC117135104		TMPRSS2 E3 enhancer		21q	21	NC_000021.9	41529122	41531495	plus	0
9606	Homo sapiens	117134611	0	live	LOC117134611		TMPRSS2 -17 kb enhancer	TMPRSS2 E2 enhancer	21q	21	NC_000021.9	41525423	41527425	plus	0
9606	Homo sapiens	117134607	0	live	LOC117134607		TMPRSS2 repressive element NBS4	NKX3.1 binding site 4 in TMPRSS2 5' regulatory region	21q	21	NC_000021.9	41518773	41518846	plus	0
9606	Homo sapiens	117134606	0	live	LOC117134606		TMPRSS2 repressive element NBS2	NKX3.1 binding site 2 in TMPRSS2 5' regulatory region	21q	21	NC_000021.9	41511423	41511482	plus	0
9606	Homo sapiens	117134605	0	live	LOC117134605		TMPRSS2 repressive element NBS1	NKX3.1 binding site 1 in TMPRSS2 5' regulatory region	21q	21	NC_000021.9	41510416	41510509	plus	0
9606	Homo sapiens	7059	0	live	THBS3	TSP3	thrombospondin 3	thrombospondin-3	1q22	1	NC_000001.11	155195588	155209180	minus	25	188062
9606	Homo sapiens	50834	0	live	TAS2R1	T2R1, TRB7	taste 2 receptor member 1	taste receptor type 2 member 1|taste receptor, family B, member 7|taste receptor, type 2, member 1	5p15.31	5	NC_000005.10	9627347	9903876	minus	10	604796
9606	Homo sapiens	117134593	0	live	LOC117134593		ACE2 promoter region	ACE2 5' regulatory region	Xp	X	NC_000023.11	15600911	15603000	plus	0
9606	Homo sapiens	353189	0	live	SLCO4C1	OATP-H, OATP-M1, OATP4C1, OATPX, PRO2176, SLC21A20	solute carrier organic anion transporter family member 4C1	solute carrier organic anion transporter family member 4C1|organic anion transporter M1|solute carrier family 21 member 20	5q21.1	5	NC_000005.10	102233986	102296516	minus	15	609013
9606	Homo sapiens	119230225	0	live	LOC119230225		IFNAR1 promoter region	IFNAR1 5' regulatory region	21q	21	NC_000021.9	33323674	33324981	plus	0
9606	Homo sapiens	117204000	0	live	LOC117204000		ANPEP distal promoter	CD13/APN upstream promoter|aminopeptidase N myeloid and fibroblast promoter	15q	15	NC_000015.10	89814788	89815942	plus	0
9606	Homo sapiens	117204001	0	live	LOC117204001		ANPEP proximal promoter	CD13/APN downstream promoter|aminopeptidase N intestinal epithelial promoter	15q	15	NC_000015.10	89806536	89808328	plus	0
9606	Homo sapiens	112679198	0	live	LOC112679198		ABO +5.8 intron 1 enhancer		9q	9	NC_000009.12	133267998	133270594	plus	0
9606	Homo sapiens	119266102	0	live	LOC119266102		IFNGR2 promoter region	IFNGR2 5' regulatory region	21q	21	NC_000021.9	33402361	33403538	plus	0
9606	Homo sapiens	117152610	0	live	LOC117152610		DPP4 promoter region	DPP4 5' regulatory region	2q	2	NC_000002.12	162074620	162076396	plus	0
9606	Homo sapiens	106699567	0	live	LOC106699567		CD8A intronic regulatory region			2	NC_000002.12	86786076	86789185	plus	0
9606	Homo sapiens	118966792	0	live	LOC118966792		dACE2 interferon-inducible promoter region	MIRb-ACE2 retroelement-containing promoter	Xp	X	NC_000023.11	15580397	15581220	plus	0
9606	Homo sapiens	119086083	0	live	LOC119086083		CCR9 promoter region	CCR9 5' regulatory region	3p21.31	3	NC_000003.12	45885559	45886558	plus	0
9606	Homo sapiens	117152611	0	live	LOC117152611		DPP4 -4.2 kb glucocorticoid response element		2q	2	NC_000002.12	162078687	162078798	plus	0
9606	Homo sapiens	116183087	0	live	LOC116183087		CRISPRi-validated cis-regulatory element chr7.1155		7p	7	NC_000007.14	22681862	22682474	plus	0
9606	Homo sapiens	116183086	0	live	LOC116183086		CRISPRi-validated cis-regulatory element chr7.1154		7p	7	NC_000007.14	22680564	22680961	plus	0
9606	Homo sapiens	117693187	0	live	LOC117693187		CTSL 3' regulatory element		9q	9	NC_000009.12	87731108	87732607	plus	0
9606	Homo sapiens	116158495	0	live	LOC116158495		CRISPRi-validated cis-regulatory element chr4.1814		4q	4	NC_000004.12	74057709	74057893	plus	0
9606	Homo sapiens	116158494	0	live	LOC116158494		CRISPRi-validated cis-regulatory element chr4.1813		4q	4	NC_000004.12	74056553	74057496	plus	0
9606	Homo sapiens	112590817	0	live	LOC112590817		Sharpr-MPRA regulatory region 2453		1p	1	NC_000001.11	64934306	64934600	plus	0
9606	Homo sapiens	112590816	0	live	LOC112590816		Sharpr-MPRA regulatory region 6411		1p	1	NC_000001.11	64915906	64916200	plus	0
9606	Homo sapiens	192343	0	live	NEWENTRY		Record to support submission of GeneRIFs for a gene not in Gene (human).
60711	Chlorocebus sabaeus	103231639	0	live	ACE2		angiotensin converting enzyme 2	angiotensin-converting enzyme 2|angiotensin I converting enzyme 2		Un
60711	Chlorocebus sabaeus	103219191	0	live	TMPRSS2		transmembrane serine protease 2	transmembrane protease serine 2|transmembrane protease, serine 2		Un
